# Supplementary material for: Gold-catalyzed intermolecular tandem cyclization/[4 + 3] cycloaddition of 2-(1-alkynyl)-cyclopropyl pyridines with nitrones: an efficient strategy for the synthesis of [1,2]oxazepino[5,4-a] indolizines
Source: Royal Society of Chemistry journal article supplement (doi:10.1039/d4qo00580e), 2024-01-01
Supplement: d4qo00580e1.pdf [file d4qo00580e1.pdf]

Supporting Information

**Gold-Catalyzed Intermolecular Tandem Cyclization/[4+3]  
Cycloaddition of 2-(1-Alkynyl)-cyclopropyl Pyridines with  
Nitrones: An Efficient Strategy for Synthesis of  
[1,2]Oxazepino[5,4-a] indolizines**

Fucaï Rao<sup>a</sup>, Meng Cheng<sup>a</sup>, Zhiwei Hu<sup>a</sup>, Xinyi Chen<sup>a</sup>, Suyang Zhao<sup>a</sup> and Zuliang Chen<sup>\*ab</sup>  
<sup>a</sup> College of Chemistry and Bio-engineering, Yichun University, Yichun 336000, P.R. China  
<sup>b</sup> Key Laboratory of Jiangxi University for Applied Chemistry and Chemical Biology, Yichun  
University 336000 (P.R. China)  
Email : [zai81789@163.com](mailto:zai81789@163.com) (Zuliang Chen)

**General information.**

<sup>1</sup>H NMR and <sup>13</sup>C NMR spectra were recorded on a Bruker 400 or 500 MHz spectrometer in chloroform-d<sub>3</sub>. All signals are reported in ppm with the internal TMS signal at 0 ppm as a standard. The data is being reported as (s = singlet, d = doublet, t = triplet, m = multiplet or unresolved, br = broad signal, coupling constant(s) in Hz, integration). All reactions were carried out under an atmosphere of nitrogen in flame-dried glassware with magnetic stirring. All solvents were freshly distilled from CaH<sub>2</sub> before use. Melting points were measured on a YUHUA X-4 apparatus and uncorrected. Catalysts purchased from Bidepharm Co. Ltd, J&K or Energy Chemical Company were used directly. 4 Å molecular sieves purchased from Sinopharm Chemical Reagent Co., Ltd were powdered and dried at 300 °C in a muffle furnace for 8-10 hours before use.

## 1. Substrate synthesis

2-(1-alkynyl)-cyclopropyl pyridines **1** were synthesized according to the reported method. And the spectral data of 2-(1-alkynyl)-cyclopropyl pyridines **1a-1f**, **1h**, **1i**, **1l**, **1p** and **1q** are consisted with the literature (R.-R. Liu, S.-C. Ye, C.-J. Lu, B. Xiang, J. Gao, Y.-X. Jia, *Org. Biomol. Chem.* 2015, **13**, 4855-4858).

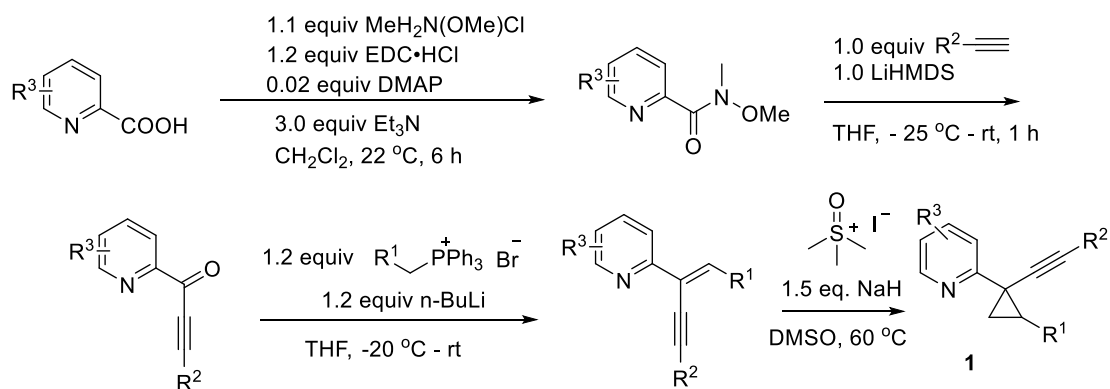

1) Weinreb's amides were prepared according to the following procedure from Picolinic acid:

Picolinic acid (1.0 eq.), DMAP (0.02 eq.), EDC (1.2 eq.), and *N,O*-dimethyl hydroxylamine hydrochloride (1.1 eq.) were weighed into a flame-dried round bottom flask and sealed with a septa. Dry  $\text{CH}_2\text{Cl}_2$  was added through a syringe, and the solution was cooled to  $0\text{ }^\circ\text{C}$  (ice bath). Triethylamine (3.0 eq.) was added through a syringe and stirring was allowed to continue at  $0\text{ }^\circ\text{C}$  for 15 min. The ice bath was removed and the mixture was stirred for an additional 6 hours at rt. The reaction was then quenched through the addition of water. After the separation of the organic layer, the aqueous layer was neutralized with a saturated aqueous solution of  $\text{NaHCO}_3$ . When a pH of 7-8 was reached, the aqueous layer was washed with  $\text{CH}_2\text{Cl}_2$  (3 x 50 mL). All organic layers were combined and washed with a saturated aqueous solution of  $\text{NaHCO}_3$  (2 x 30 mL), and a saturated aqueous solution of  $\text{NaCl}$  (2 x 30 mL), dried with  $\text{MgSO}_4$ , filtered and concentrated under reduced pressure to yield the amide as a yellow oil.

2) pyridyl-substituted alkynyl ketones:

A flame-dried round bottom flask was charged with a stir bar and sealed with septa. THF (40 mL) and phenylacetylene (1.0 eq.) were added through a syringe. The solution was cooled to  $-25\text{ }^\circ\text{C}$  upon which LiHMDS (1.0 eq.) was added dropwise by syringe. The mixture was allowed to stir at  $-25\text{ }^\circ\text{C}$  for 20 min, and a solution of Weinreb's amide (1.0 eq.) was added through a syringe. The mixture was allowed to

stir at rt for 1 h. The reaction was quenched through addition of a aqueous solution of citric acid (1%). The mixture was diluted with EtOAc (20 mL) and washed with a saturated solution of NaCl (2 x 25 mL). The aqueous layer was washed with EtOAc (2 x 30 mL) and the combined organic layers were dried over MgSO<sub>4</sub>, filtered and concentrated under reduced pressure. The resulting oil was purified by silica gel chromatography. The resulting red oil was loaded onto silica with PE:EA (10:1), to afford the pyridyl-substituted alkynyl ketones.

### 3) 2-(1-alkynyl)-2-alken-1-pyridine:

To a solution of the benzyl bromide ylide (1.2 eq.) in dry THF (50 mL) at -20 °C. n-butyllithium (1.2 eq.) was added dropwise via syringe. The white solution gradually turned red, After 15 min, pyridyl-substituted alkynyl ketones **1** (1.0 eq.) was added to the solution, and then the solution turned brown. The mixture was allowed to stir at rt, after the reaction was over, the mixture was poured into water and extracted with EtOAc (3 x 20 mL). The combined organic phase was dried over MgSO<sub>4</sub> and filtered. The solvent was removed under vacuum and the residue was purified by flash chromatography on silica gel, eluting with ethyl acetate/petroleum ether 1:10 (v/v), to afford the 2-(1-alkynyl)-2-alken-1-pyridine.

### 4) 2-(1-alkynyl)-cyclopropyl pyridines **1**:

To a solution of the trimethylsulfoxonium iodide (1.0 eq.) in dry DMSO (50 mL) at rt. And then NaH (1.5 eq.) was added portion-wise. After 10 min, 2-(1-alkynyl)-2-alken-1-pyridine (1.0 eq.) was added to the solution. The mixture was allowed to stir at 60 °C. After the reaction was complete, the mixture was poured into water and extracted with EtOAc (3 x 20 mL). The combined organic phase was dried over MgSO<sub>4</sub> and filtered. The solvent was removed under vacuum and the residue was purified by flash chromatography on silica gel, eluting with ethyl acetate/petroleum ether 1:10 (v/v), to afford 2-(1-alkynyl)-cyclopropyl pyridines **1**. The spectral data of new 2-(1-alkynyl)-cyclopropyl pyridines **1e**, **1h**, **1k**, **1l**, **1n**, **1o** and **1p** are showed below.

### 2-(1-alkynyl)-cyclopropyl pyridines **1e**

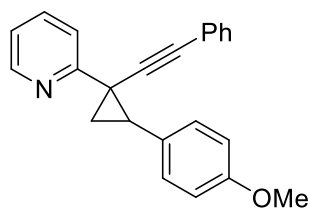

The reaction mixture was stirred for 5 hours at 60 °C until the reaction was complete (monitored by TLC, ethyl acetate:petroleum ether = 1:5). Purified by chromatography on silica gel eluting with PE/EA = 10/1; yield = 73%, white solid; m.p. 93-95 °C. <sup>1</sup>H NMR (400 MHz, CDCl<sub>3</sub>): δ 8.51-8.49 (m, 1H), 7.92 (d, *J* = 8.0 Hz, 1H), 7.64-7.60 (m, 1H), 7.26-7.19 (m, 7H), 7.09-7.08 (m, 1H), 6.89-6.86 (m, 2H), 3.80 (s, 3H), 3.10 (t, *J* = 8.0 Hz 1H), 2.37 (dd, *J* = 8.8 Hz, 4.0 Hz 1H), 1.93 (dd, *J* = 7.6 Hz, 4.4 Hz 1H); <sup>13</sup>C NMR (100 MHz, CDCl<sub>3</sub>): δ 159.5, 158.4, 149.0, 136.0, 131.5, 129.9, 129.6, 128.1, 127.7, 123.5, 121.5, 120.8, 113.3, 89.6, 83.7, 55.3, 37.2, 27.6, 25.7; HRMS-TOF-ES<sup>+</sup>: Calculated for C<sub>23</sub>H<sub>19</sub>ONH<sup>+</sup> ([M+H]<sup>+</sup>): 326.1545, Found: 326.1549.

### 2-(1-alkynyl)-cyclopropyl pyridines **1h**

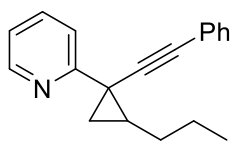

The reaction mixture was stirred for 5 hours at 60 °C until the reaction was complete (monitored by TLC, ethyl acetate:petroleum ether = 1:5). Purified by chromatography on silica gel eluting with PE/EA = 10/1; yield = 57%, yellow liquid; <sup>1</sup>H NMR (400 MHz, CDCl<sub>3</sub>): δ 8.45 (dd, *J* = 4.8, 0.8 Hz, 1H), 7.92 (d, *J* = 8.0 Hz, 1H), 7.62-7.59 (m, 1H), 7.52-7.45 (m, 2H), 7.34-7.26 (m, 3H), 7.07-7.02 (m, 1H), 1.97-1.75 (m, 1H), 1.72-1.70 (m, 1H), 1.67-1.64 (m, 1H), 1.62-1.59 (m, 1H), 1.58-1.51 (m, 2H), 1.23 (dd, *J* = 6.8 Hz, 3.8 Hz 1H), 0.98 (t, *J* = 7.2 Hz, 3H); <sup>13</sup>C NMR (100MHz, CDCl<sub>3</sub>): δ 160.7, 148.9, 135.9, 131.7, 128.3, 127.7, 123.8, 121.3, 120.5, 90.4, 82.0, 33.1, 32.7, 27.7, 23.8, 22.3, 14.0; HRMS-TOF-ES<sup>+</sup>: Calculated for C<sub>19</sub>H<sub>19</sub>NH<sup>+</sup> ([M+H]<sup>+</sup>): 262.1596, Found: 262.1589.

### 2-(1-alkynyl)-cyclopropyl pyridines **1k**

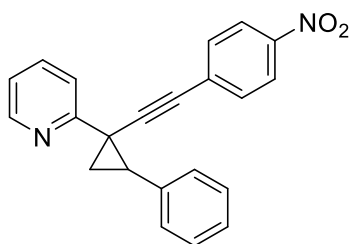

The reaction mixture was stirred for 5 hours at 60 °C until the reaction was complete (monitored by TLC, ethyl acetate:petroleum ether = 1:5). Purified by chromatography on silica gel eluting with PE/EA = 10/1; yield = 36%; brown solid, m.p. 97-99 °C; <sup>1</sup>H NMR (400 MHz, CDCl<sub>3</sub>): δ 8.54 (d, *J* = 8.0 Hz 1H), 8.08 (d, *J* = 8.0 Hz, 2H), 7.85 (d, *J* = 8.0 Hz 1H), 7.71-7.63 (m, 1H), 7.36-7.33 (m, 4H), 7.30-7.28 (m, 1H), 7.24-7.20 (m, 2H), 7.16-7.12 (m, 1H), 3.27 (t, *J* = 8.0 Hz 1H), 2.46 (dd, *J* = 8.8, 4.8 Hz, 1H), 2.08 (dd, *J* = 8.8, 4.0 Hz, 1H); <sup>13</sup>C NMR (100MHz, CDCl<sub>3</sub>): δ 158.4, 149.3, 146.6, 137.3, 136.2, 132.0, 130.4, 128.6, 127.9, 126.8, 123.4, 121.3, 121.2, 95.9, 82.1, 38.1, 27.8, 25.5; HRMS-TOF-ES<sup>+</sup>: Calculated for C<sub>22</sub>H<sub>16</sub>N<sub>2</sub>O<sub>2</sub>H<sup>+</sup> ([M+H]<sup>+</sup>): 341.1290, Found: 341.1292.

### 2-(1-alkynyl)-cyclopropyl pyridines **1l**

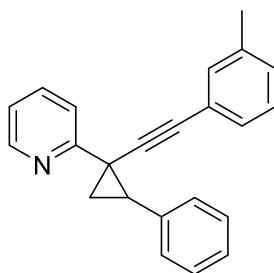

The reaction mixture was stirred for 5 hours at 60 °C until the reaction was complete (monitored by TLC, ethyl acetate:petroleum ether = 1:5). Purified by chromatography on silica gel eluting with PE/EA = 10/1; yield = 50%. yellow liquid; <sup>1</sup>H NMR (400 MHz, CDCl<sub>3</sub>): δ 8.59-8.57 (m, 1H), 8.01 (d, *J* = 8.0 Hz, 1H), 7.71-7.63 (m, 1H), 7.46-7.35 (m, 4H), 7.34-7.27 (m, 1H), 7.21-7.02 (m, 5H), 3.26 (t, *J* = 8.0 Hz, 1H), 2.48 (dd, *J* = 8.8, 4.4 Hz, 1H), 2.32 (s, 3H), 2.11-2.03 (m, 1H); <sup>13</sup>C NMR (100MHz, CDCl<sub>3</sub>): δ 159.4, 149.0, 137.7, 137.66, 136.0, 132.1, 128.6, 128.5, 128.4, 128.0, 127.7, 126.4, 123.2, 121.5, 120.8, 88.9, 83.9, 37.6, 27.7, 25.4, 21.1; HRMS-TOF-ES<sup>+</sup>: Calculated for C<sub>23</sub>H<sub>19</sub>NH ([M+H]<sup>+</sup>): 310.1596, Found: 310.1602.

### 2-(1-alkynyl)-cyclopropyl pyridines **1n**

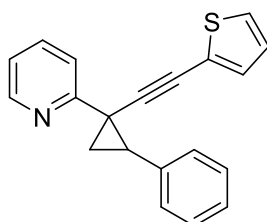

The reaction mixture was stirred for 4 hours at 60 °C until the reaction was complete (monitored by TLC, ethyl acetate:petroleum ether = 1:5). Purified by chromatography on silica gel eluting with PE/EA = 10/1; yield = 82%; yellowish solid, m.p. 62-64 °C;

$^1\text{H}$  NMR (400 MHz,  $\text{CDCl}_3$ ):  $\delta$  8.52-8.48 (m, 1H), 7.89-7.84 (m, 1H), 7.64-7.56 (m, 1H), 7.35-7.05 (m, 5H), 7.13-7.05 (m, 2H), 6.95 (d,  $J = 4.0$  Hz, 1H), 6.89-6.84 (m, 1H), 3.21-3.14 (m, 1H), 2.43-2.38 (m, 1H), 2.04-1.97 (m, 1H);  $^{13}\text{C}$  NMR (100MHz,  $\text{CDCl}_3$ ):  $\delta$  159.0, 149.1, 137.4, 136.1, 131.4, 128.5, 127.8, 126.7, 126.6, 126.3, 123.5, 121.5, 120.9, 93.4, 76.8, 38.0, 28.0, 25.6; HRMS-TOF-ES<sup>+</sup>: Calculated for  $\text{C}_{20}\text{H}_{15}\text{NSH}$  ( $[\text{M}+\text{H}]^+$ ): 302.1002, Found: 302.1003.

#### 2-(1-alkynyl)-cyclopropyl pyridines **1o**

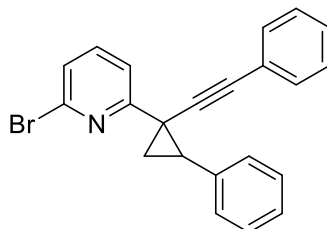

The reaction mixture was stirred for 6 hours at 60 °C until the reaction was complete (monitored by TLC, ethyl acetate:petroleum ether = 1:5). Purified by chromatography on silica gel eluting with PE/EA = 10/1; yield = 63%; yellowish solid, m.p. 61-63 °C;  $^1\text{H}$  NMR (400 MHz,  $\text{CDCl}_3$ ):  $\delta$  7.86 (dd, 8.0, 0.8 Hz, 1H), 7.46 (t,  $J = 7.6$  Hz, 1H), 7.36-7.30 (m, 4H), 7.28-7.18 (m, 5H), 7.17-7.13 (m, 2H), 3.17 (t,  $J = 8.4$  Hz, 1H), 2.41 (dd,  $J = 8.8, 4.4$  Hz, 1H), 2.02 (dd,  $J = 7.6, 4.4$  Hz, 1H);  $^{13}\text{C}$  NMR (100MHz,  $\text{CDCl}_3$ ):  $\delta$  161.4, 141.6, 138.3, 137.3, 131.4, 128.6, 128.1, 127.84, 127.8, 126.7, 125.1, 123.2, 120.3, 88.4, 84.0, 38.4, 27.6, 25.9; HRMS-TOF-ES<sup>+</sup>: Calculated for  $\text{C}_{22}\text{H}_{16}\text{NBrNa}$  ( $[\text{M}+\text{Na}]^+$ ): 396.0360, Found: 396.0364.

#### 2-(1-alkynyl)-cyclopropyl pyridines **1p**

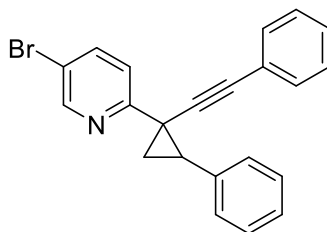

The reaction mixture was stirred for 5 hours at 60 °C until the reaction was complete (monitored by TLC, ethyl acetate:petroleum ether = 1:5). Purified by chromatography on silica gel eluting with PE/EA = 10/1; yield = 49%; yellowish solid, m.p. 77-79 °C;  $^1\text{H}$  NMR (400 MHz,  $\text{CDCl}_3$ ):  $\delta$  8.55 (d,  $J = 2.0$  Hz, 1H), 7.82 (d,  $J = 8.4$  Hz, 1H), 7.76-7.70 (m, 1H), 7.35-7.30 (m, 4H), 7.25-7.20 (m, 4H), 7.18-7.12 (m, 2H), 3.14 (t,  $J = 8.4$  Hz, 1H), 2.37 (dd,  $J = 9.2$  Hz, 4.4 Hz, 1H), 2.01 (dd,  $J = 7.6, 4.4$  Hz, 1H);  $^{13}\text{C}$  NMR (100MHz,  $\text{CDCl}_3$ ):  $\delta$  158.3, 150.0, 138.5, 137.4, 131.4, 128.6, 128.1, 127.8, 126.7, 123.2, 123.0, 117.6, 88.7, 83.9, 38.1, 27.5, 25.6; HRMS-TOF-ES<sup>+</sup>: Calculated

for C<sub>22</sub>H<sub>16</sub>NBrNa ([M+Na]<sup>+</sup>): 396.0364, Found: 396.0365.

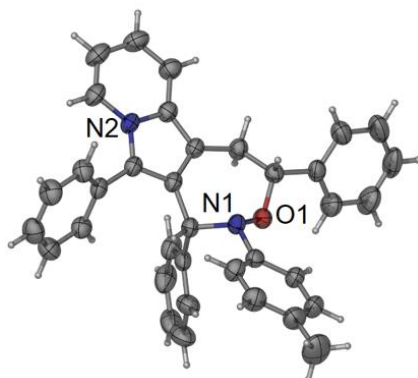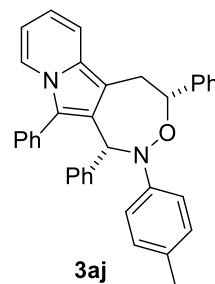

X-ray crystal structure of compound **3aj** (CCDC 2312481).

Structure factor report

### Datablock: exp\_2891

|                                                                         |                                                          |                                                  |
|-------------------------------------------------------------------------|----------------------------------------------------------|--------------------------------------------------|
| Bond precision:                                                         | C-C = 0.0021 Å                                           | Wavelength=1.54184                               |
| Cell:                                                                   | a=9.0251(3)      b=11.7442(4)      c=15.5807(4)          |                                                  |
|                                                                         | alpha=68.062(3)      beta=73.701(3)      gamma=68.609(3) |                                                  |
| Temperature:                                                            | 297 K                                                    |                                                  |
| Volume                                                                  | Calculated<br>1406.26(9)                                 | Reported<br>1406.26(9)                           |
| Space group                                                             | P -1                                                     | P -1                                             |
| Hall group                                                              | -P 1                                                     | -P 1                                             |
| Moiety formula                                                          | C <sub>36</sub> H <sub>30</sub> N <sub>2</sub> O         | C <sub>36</sub> H <sub>30</sub> N <sub>2</sub> O |
| Sum formula                                                             | C <sub>36</sub> H <sub>30</sub> N <sub>2</sub> O         | C <sub>36</sub> H <sub>30</sub> N <sub>2</sub> O |
| Mr                                                                      | 506.62                                                   | 506.62                                           |
| Dx, g cm <sup>-3</sup>                                                  | 1.196                                                    | 1.196                                            |
| Z                                                                       | 2                                                        | 2                                                |
| Mu (mm <sup>-1</sup> )                                                  | 0.556                                                    | 0.556                                            |
| F <sub>000</sub>                                                        | 536.0                                                    | 536.0                                            |
| F <sub>000</sub> '                                                      | 537.44                                                   |                                                  |
| h, k, lmax                                                              | 10, 14, 18                                               | 10, 14, 18                                       |
| Nref                                                                    | 5025                                                     | 5005                                             |
| Tmin, Tmax                                                              | 0.851, 0.885                                             | 0.911, 1.000                                     |
| Tmin'                                                                   | 0.851                                                    |                                                  |
| Correction method= # Reported T Limits: Tmin=0.911 Tmax=1.000 AbsCorr = | MULTI-SCAN                                               |                                                  |
| Data completeness= 0.996                                                | Theta(max)= 67.074                                       |                                                  |
| R(reflections)= 0.0353( 4358)                                           | WR2(reflections)= 0.0994( 5005)                          |                                                  |
| S = 1.070                                                               | Npar= 354                                                |                                                  |

The following ALERTS were generated. Each ALERT has the format  
[test-name\\_ALERT\\_alert-type\\_alert-level](#).  
Click on the hyperlinks for more details of the test.

## 2. Typical procedure for Gold-catalyzed cyclization reaction.

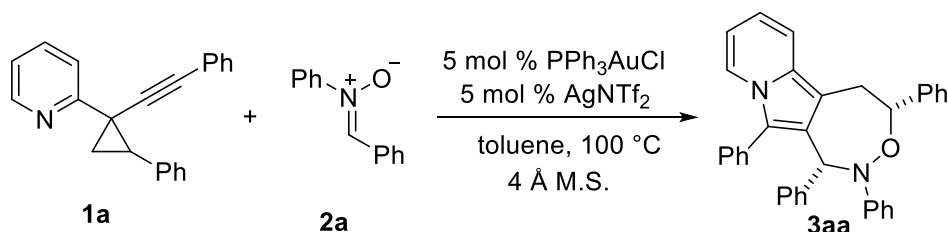

Under N<sub>2</sub>, a flame-dried vial (10 mL) was charged with 5 mol % PPh<sub>3</sub>AuCl, 5 mol % AgNTf<sub>2</sub>, dry DCM (1.5 mL), and the mixture was stirred at rt for 2 h. The resulting AgCl was filtered off, and the filtrate was collected, evaporated, and transferred into another flame-dried schlenk tube (25 mL). And then, 2-(1-alkynyl)-cyclopropyl pyridines **1a** (0.2 mmol), nitronium **2a** (0.4 mmol), 100 mg of activated 4 Å molecular sieves powder (M. S.), dry toluene (2.0 mL) was successively added to the schlenk tube (25 mL). The reaction mixture was stirred at 100 °C for 16 hours until the reaction was complete (monitored by TLC, hexanes:AcOEt = 20:1). The reaction mixture was passed over a plug of silica gel with 15 mL of CH<sub>2</sub>Cl<sub>2</sub>. The solvent was removed under reduced pressure and the residue was purified by silica gel column chromatography, eluting with (hexanes:AcOEt = 100:1 to 30:1) to afford 89 mg (90%) of **3aa** (dr = 10:1), yellow solid. m.p. 207-209 °C; <sup>1</sup>H NMR (500 MHz, CDCl<sub>3</sub>): δ 7.96 (d, *J* = 7.5 Hz, 1H), 7.46-7.31 (m, 11H), 7.25-7.19 (m, 3H), 7.17-7.11 (m, 4H), 6.86-6.83 (m, 3H), 6.72-6.68 (m, 1H), 6.43 (t, *J* = 6.5 Hz, 1H), 6.07 (s, 1H), 5.29-5.26 (m, 1H), 3.60-3.54 (m, 1H), 3.50-3.46 (m, 1H); <sup>13</sup>C NMR (125 MHz, CDCl<sub>3</sub>): δ 149.6, 141.6, 139.2, 130.9, 130.2, 129.3, 129.0, 128.7, 128.4, 128.0, 127.7, 127.6, 126.9, 126.6, 126.4, 122.3, 122.2, 120.7, 117.1, 116.7, 115.9, 110.1, 109.3, 85.5, 67.0, 34.7; HRMS *m/z* (ESI<sup>+</sup>): Calculated for C<sub>35</sub>H<sub>29</sub>N<sub>2</sub>O<sup>+</sup> ([M+H]<sup>+</sup>): 493.2274, Found: 493.2274.

### Gram synthesis of indolizine **3aa**.

Under N<sub>2</sub>, a flame-dried vial (20 mL) was charged with 5 mol % PPh<sub>3</sub>AuCl, 5 mol % AgNTf<sub>2</sub>, dry DCM (5 mL), and the mixture was stirred at rt for 2 h. The resulting AgCl was filtered off, and the filtrate was collected, evaporated, and transferred into another flame-dried schlenk tube (100 mL). And then, 2-(1-alkynyl)-cyclopropyl pyridines **1a** (3 mmol), nitronium **2a** (6 mmol), 800 mg of activated 4 Å molecular sieves powder (M. S.), dry toluene (30 mL) was successively added to the schlenk tube. The reaction mixture was stirred at 100 °C for overnight until the reaction was complete (monitored by TLC, hexanes:AcOEt = 20:1). The reaction mixture was passed over a plug of silica gel with 100 mL of CH<sub>2</sub>Cl<sub>2</sub>. The solvent was removed under reduced pressure and the residue was purified by silica gel column chromatography, eluting



with (hexanes:AcOEt = 100:1 to 30:1) to afford 1.18 g (80%).

### Synthesis of **3ba**

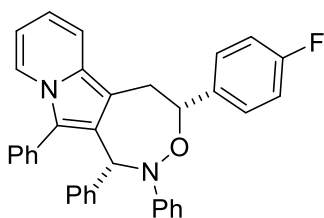

The reaction mixture was stirred for 19 hours at 100 °C until the reaction was complete (5 mol % catalyst used). Purified by chromatography on silica gel, eluting with PE/EA = 30:1 (v/v), affording 89 mg (87%) of **3ba** (dr = 9:1), light yellow solid, m.p. 184-186 °C; <sup>1</sup>H NMR (500 MHz, CDCl<sub>3</sub>): δ 7.98 (d, *J* = 7.0 Hz, 1H), 7.47-7.39 (m, 7H), 7.25-7.23 (m, 3H), 7.18 (t, *J* = 8.0 Hz, 2H), 7.15-7.12 (m, 2H), 7.09 (t, *J* = 8.5 Hz, 2H), 6.88-6.85 (m, 3H), 6.74-6.71 (m, 1H), 6.45 (t, *J* = 7.0 Hz, 1H), 6.10 (s, 1H), 5.31-5.28 (m, 1H), 3.61-3.54 (m, 1H), 3.52-3.48 (m, 1H); <sup>13</sup>C NMR (125MHz, CDCl<sub>3</sub>): δ 162.3 (d, *J* = 244.3 Hz), 149.6, 139.1, 137.4, 130.9, 130.2, 130.1, 129.3, 129.0, 128.7, 128.1 (d, *J* = 8.0 Hz), 128.0, 127.6, 126.9, 126.6, 122.3, 120.8, 117.0, 116.7, 115.9, 115.3, 115.1, 110.2, 109.0, 84.8, 67.2, 34.7; HRMS *m/z* (ESI<sup>+</sup>): Calculated for C<sub>35</sub>H<sub>28</sub>FN<sub>2</sub>O<sup>+</sup> ([M+H]<sup>+</sup>): 511.2180, Found: 511.2180.

### Synthesis of **3ca**

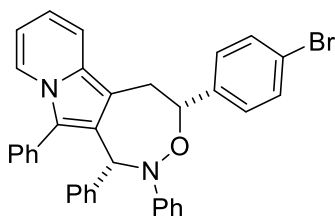

The reaction mixture was stirred for 25 hours at 100 °C until the reaction was complete (5 mol % catalyst used). Purified by chromatography on silica gel, eluting with PE/EA = 30:1 (v/v), affording 101 mg (87%) of **3ca** (dr = 7:1); yellow solid, m.p. 171-173 °C; <sup>1</sup>H NMR (500 MHz, CDCl<sub>3</sub>) δ 7.97 (d, *J* = 7.0 Hz, 1H), 7.53-7.36 (m, 7H), 7.31-7.27 (m, 3H), 7.25-7.20 (m, 3H), 7.19-7.15 (m, 2H), 7.11-7.08 (m, 2H), 6.89-6.83 (m, 3H), 6.72 (dd, *J* = 6.5, 8.5 Hz, 1H), 6.46-6.43 (m, 1H), 6.07 (s, 1H), 5.25 (dd, *J* = 3.0, 10.0 Hz, 1H), 3.56-3.45 (m, 2H); <sup>13</sup>C NMR (125 MHz, CDCl<sub>3</sub>) δ 149.6, 140.6, 139.0, 131.5, 130.9, 130.2, 129.3, 129.0, 128.7, 128.1, 128.0, 127.6, 127.0, 126.6, 122.4, 122.3, 121.6, 120.9, 117.0, 116.8, 116.0, 110.2, 108.9, 84.9, 67.4, 34.7; HRMS *m/z* (ESI<sup>+</sup>): Calculated for C<sub>35</sub>H<sub>28</sub>BrN<sub>2</sub>O<sup>+</sup> ([M+H]<sup>+</sup>): 571.1380, Found: 571.1373.

### Synthesis of **3da**

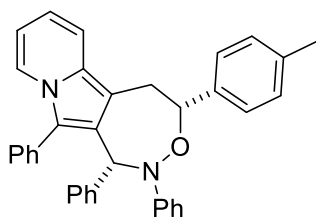

The reaction mixture was stirred for 13 hours at 100 °C until the reaction was complete (5 mol % catalyst used). Purified by chromatography on silica gel, eluting with PE/EA = 30:1 (v/v), affording 95 mg (92%) of **3da** (dr = 12:1); yellow solid, m.p. 185-187 °C;  $^1\text{H}$  NMR (500 MHz,  $\text{CDCl}_3$ )  $\delta$  8.00 (d,  $J$  = 7.0 Hz, 1H), 7.49-7.34 (m, 7H), 7.28-7.16 (m, 10H), 6.89 (d,  $J$  = 8.5 Hz, 3H), 6.75-6.71 (m, 1H), 6.46 (t,  $J$  = 6.5 Hz, 1H), 6.12 (s, 1H), 5.29 (dd,  $J$  = 2.0, 10.5 Hz, 1H), 3.65-3.59 (m, 1H), 3.53-3.48 (m, 1H), 2.42 (s, 3H);  $^{13}\text{C}$  NMR (125 MHz,  $\text{CDCl}_3$ )  $\delta$  149.5, 139.2, 138.6, 137.3, 130.8, 130.1, 129.3, 129.0, 128.9, 128.6, 127.9, 127.6, 126.9, 126.5, 126.4, 122.3, 122.2, 120.6, 117.1, 116.7, 115.8, 110.1, 109.3, 85.3, 66.8, 34.6, 21.2; HRMS  $m/z$  (ESI $^+$ ): Calculated for  $\text{C}_{36}\text{H}_{31}\text{N}_2\text{O}^+$  ( $[\text{M}+\text{H}]^+$ ): 507.2431, Found: 507.2429.

### Synthesis of **3ea**

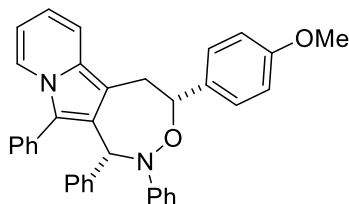

The reaction mixture was stirred for 4 hours at 100 °C until the reaction was complete (5 mol % catalyst used). Purified by chromatography on silica gel, eluting with PE/EA = 30:1 (v/v), affording 76 mg (77%) of **3ea** (dr = 7:1); yellow solid, m.p. 113-115 °C;  $^1\text{H}$  NMR (400 MHz,  $\text{CDCl}_3$ )  $\delta$  7.93 (d,  $J$  = 7.2 Hz, 1H), 7.42-7.30 (m, 7H), 7.18 (m, 2H), 7.14-7.10 (m, 5H), 7.20-7.11 (m, 2H), 6.80-9-6.76 (m, 3H), 6.68-6.62 (m, 1H), 6.42-6.35 (m, 1H), 5.83 (s, 1H), 5.18 (d,  $J$  = 10.0 Hz, 1H), 3.80 (s, 3H), 3.57-3.4 (m, 2H);  $^{13}\text{C}$  NMR (100 MHz,  $\text{CDCl}_3$ )  $\delta$  159.1, 149.5, 139.2, 133.8, 130.9, 130.7, 130.1, 129.3, 129.0, 128.7, 128.4, 128.0, 127.8, 127.6, 127.4, 126.9, 126.5, 122.3, 120.9, 120.5, 117.1, 116.7, 115.8, 113.7, 113.4, 110.1, 109.3, 85.0, 66.7, 55.3, 34.4; HRMS  $m/z$  (ESI $^+$ ): Calculated for  $\text{C}_{36}\text{H}_{31}\text{N}_2\text{O}_2^+$  ( $[\text{M}^+\text{H}]^+$ ): 523.2386, Found: 523.2381.

### Synthesis of **3fa**

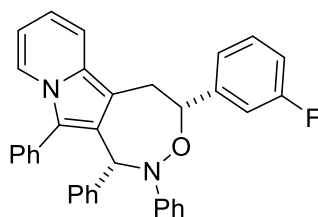

The reaction mixture was stirred for 15 hours at 100 °C until the reaction was complete (5 mol % catalyst used). Purified by chromatography on silica gel, eluting with PE/EA = 30:1 (v/v), affording 82 mg (80%) of **3fa** (dr = 7:1); yellow solid, m.p. 205-207 °C; <sup>1</sup>H NMR (500 MHz, CDCl<sub>3</sub>) δ 7.98 (d, *J* = 7.0 Hz, 1H), 7.46-7.32 (m, 6H), 7.26-7.09 (m, 10H), 7.03 (td, *J* = 2.0, 8.5 Hz, 1H), 6.90-6.84 (m, 3H), 6.75-6.71 (m, 1H), 6.45 (t, *J* = 6.5 Hz, 1H), 6.06 (s, 1H), 5.29 (dd, *J* = 3.0, 10.0 Hz, 1H), 3.58-3.47 (m, 2H); <sup>13</sup>C NMR (125 MHz, CDCl<sub>3</sub>) δ 162.7 (*J* = 237.5 Hz), 149.5, 144.0 (*J* = 7.5 Hz), 138.9, 130.8, 130.2, 129.9 (*J* = 7.5 Hz), 129.0, 128.7, 128.0, 127.6, 127.0, 126.5, 122.34, 122.26, 122.0 (*J* = 7.5 Hz), 121.0, 117.0, 116.8, 116.1, 114.6, 114.4, 113.4, 113.2, 110.2, 108.8, 84.8, 67.3, 34.8; HRMS *m/z* (ESI<sup>+</sup>): Calculated for C<sub>35</sub>H<sub>28</sub>FN<sub>2</sub>O<sup>+</sup> ([M+H]<sup>+</sup>): 511.2180, Found: 511.2180.

### Synthesis of 3ga

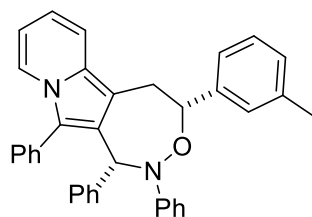

The reaction mixture was stirred for 13 hours at 100 °C until the reaction was complete (5 mol % catalyst used). Purified by chromatography on silica gel, eluting with PE/EA = 30:1 (v/v), affording 94 mg (93%) of **3ga** (dr = 8:1); yellow solid, m.p. 199-201 °C; <sup>1</sup>H NMR (500 MHz, CDCl<sub>3</sub>) δ 8.00 (d, *J* = 7.0 Hz, 1H), 7.49-7.40 (m, 5H), 7.33-7.25 (m, 7H), 7.21-7.17 (m, 5H), 6.90-6.86 (m, 3H), 6.75-6.71 (m, 1H), 6.46 (t, *J* = 6.5 Hz, 1H), 6.12 (s, 2H), 5.30-5.27 (m, 1H), 3.65-3.59 (m, 1H), 3.52-3.48 (m, 1H), 2.42 (s, 3H); <sup>13</sup>C NMR (125 MHz, CDCl<sub>3</sub>) δ 149.6, 141.5, 139.2, 137.9, 130.9, 130.2, 130.1, 129.3, 129.0, 128.7, 128.4, 128.3, 128.0, 127.6, 127.1, 126.9, 126.6, 123.5, 122.3, 122.2, 120.6, 117.1, 116.6, 115.9, 110.1, 109.4, 85.7, 66.8, 34.8, 21.5; HRMS *m/z* (ESI<sup>+</sup>): Calculated for C<sub>36</sub>H<sub>31</sub>N<sub>2</sub>O<sup>+</sup> ([M+H]<sup>+</sup>): 507.2431, Found: 507.2436.

### Synthesis of 3ha

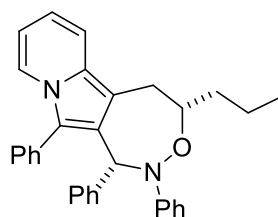

The reaction mixture was stirred for 48 hours at 100 °C until the reaction was complete (5 mol % catalyst used). Purified by chromatography on silica gel, eluting with PE/EA = 30:1 (v/v), affording 61 mg (67%) of **3ha** (dr = 6:1); yellow solid, m.p. 141-143 °C; <sup>1</sup>H NMR (500 MHz, CDCl<sub>3</sub>) δ 7.94 (d, *J* = 7.0 Hz, 1H), 7.48-7.35 (m, 5H), 7.23-7.15 (m, 6H), 6.97 (dd, *J* = 7.5, 18.0Hz, 4H), 6.90 (t, *J* = 7.0 Hz, 1H), 6.73-6.69 (m, 1H), 6.42 (t, *J* = 6.5 Hz, 1H), 5.96 (s, 1H), 4.33-4.30 (m, 1H), 3.37-3.32 (m, 1H), 3.21-3.15 (m, 1H), 1.86-1.79 (m, 1H), 1.64-1.57 (m, 2H), 1.53-1.46 (m, 1H), 0.96 (t, *J* = 7.0 Hz, 3H); <sup>13</sup>C NMR (125 MHz, CDCl<sub>3</sub>) δ 150.4, 139.0, 131.0, 130.1, 130.0, 129.5, 128.9, 128.8, 128.5, 127.8, 127.4, 126.8, 122.2, 121.9, 120.9, 117.1, 116.5, 116.3, 110.0, 109.5, 84.1, 68.4, 37.2, 32.5, 19.6, 14.1; HRMS *m/z* (ESI<sup>+</sup>): Calculated for C<sub>32</sub>H<sub>31</sub>N<sub>2</sub>O<sup>+</sup> ([M+H]<sup>+</sup>): 459.2431, Found: 459.2436.

### Synthesis of **3ia**

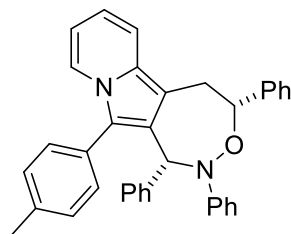

The reaction mixture was stirred for 11 hours at 100 °C until the reaction was complete (5 mol % catalyst used). Purified by chromatography on silica gel, eluting with PE/EA = 30:1 (v/v), affording 94 mg (93%) of **3ia** (dr = 20:1); yellow solid, m.p. 201-203 °C; <sup>1</sup>H NMR (500 MHz, CDCl<sub>3</sub>) δ 7.97 (d, *J* = 7.0 Hz, 1H), 7.46-7.34 (m, 7H), 7.28-7.23 (m, 6H), 7.20-7.15 (m, 4H), 6.91-6.86 (m, 3H), 6.73-6.69 (m, 1H), 6.44 (t, *J* = 6.5 Hz, 1H), 6.10 (s, 1H), 5.31 (dd, *J* = 2.0, 11.0 Hz, 1H), 3.64-3.58 (m, 1H), 3.52-3.48 (m, 1H), 2.47 (s, 3H); <sup>13</sup>C NMR (125 MHz, CDCl<sub>3</sub>) δ 149.6, 141.6, 139.2, 137.8, 130.0, 129.7, 129.3, 128.6, 128.3, 127.8, 127.6, 127.6, 126.8, 126.4, 122.4, 122.3, 120.6, 117.1, 116.5, 115.9, 110.0, 109.2, 85.6, 66.91, 34.8, 21.3; HRMS *m/z* (ESI<sup>+</sup>): Calculated for C<sub>36</sub>H<sub>31</sub>N<sub>2</sub>O<sup>+</sup> ([M+H]<sup>+</sup>): 507.2431, Found: 507.2431.

### Synthesis of **3ja**

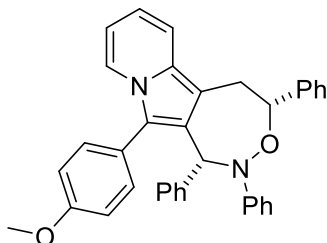

The reaction mixture was stirred for 13 hours at 100 °C until the reaction was complete (5 mol % catalyst used). Purified by chromatography on silica gel, eluting with PE/EA = 30:1 (v/v), affording 87 mg (84%) of **3ja** (dr = 20:1); yellow solid, m.p.

214-216 °C;  $^1\text{H NMR}$  (500 MHz,  $\text{CDCl}_3$ )  $\delta$  7.92 (d,  $J = 7.0$  Hz, 1H), 7.46-7.34 (m, 7H), 7.26-7.23 (m, 3H), 7.21-7.14 (m, 5H), 7.01 (s, 2H), 6.91-6.87 (m, 3H), 6.72-6.68 (m, 1H), 6.46-6.42 (m, 1H), 6.08 (s, 1H), 5.32 (dd,  $J = 2.0, 11.0$  Hz, 1H), 3.90 (s, 3H), 3.64-3.58 (m, 1H), 3.53-3.49 (m, 1H);  $^{13}\text{C NMR}$  (125 MHz,  $\text{CDCl}_3$ )  $\delta$  159.4, 149.7, 141.6, 139.3, 131.5, 129.9, 129.3, 128.6, 128.3, 127.6, 127.6, 126.9, 126.4, 126.4, 123.0, 122.3, 122.0, 120.7, 117.0, 116.4, 116.0, 114.4, 110.0, 109.0, 85.7, 67.1, 55.2, 34.8; HRMS  $m/z$  (ESI $^+$ ): Calculated for  $\text{C}_{36}\text{H}_{31}\text{N}_2\text{O}_2^+$  ([M+H] $^+$ ): 523.2380, Found: 523.2385.

### Synthesis of 3ka

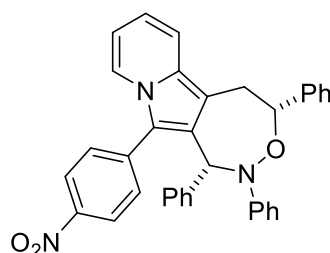

The reaction mixture was stirred for 37 hours at 100 °C until the reaction was complete (5 mol % catalyst used). Purified by chromatography on silica gel eluting with PE/EA = 30:1 (v/v), affording 57 mg (56%) of **3ka** (dr > 99:1); red solid, m.p. 240-242 °C;  $^1\text{H NMR}$  (400 MHz,  $\text{CDCl}_3$ ):  $\delta$  8.26 (d,  $J = 8$  Hz 1H), 8.04 (d,  $J = 8$  Hz 1H), 7.43-7.32 (m, 8H), 7.22-7.13 (m, 5H), 7.04 (m, 2H), 6.89-6.77 (m, 4H), 6.55-6.52 (m, 1H), 5.99 (s, 1H), 5.30-5.26 (m, 1H), 3.56 (t,  $J = 4$ Hz 2H);  $^{13}\text{C NMR}$  (100MHz,  $\text{CDCl}_3$ ):  $\delta$  149.5, 146.5, 141.2, 138.3, 137.7, 131.8, 130.0, 129.4, 128.7, 128.4, 127.8, 127.4, 126.4, 121.9, 121.3, 119.7, 118.2, 117.5, 116.3, 111.4, 110.6, 85.6, 68.1, 34.6; HRMS-TOF-ES $^+$ : Calculated for  $\text{C}_{35}\text{H}_{27}\text{N}_3\text{O}_3\text{K}^+$  ([M+K] $^+$ ) : 576.1688, Found: 576.1689.

### Synthesis of 3la

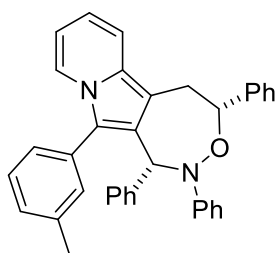

The reaction mixture was stirred for 15 hours at 100 °C until the reaction was complete (10 mol % catalyst used). Purified by chromatography on silica gel eluting with PE/EA = 30:1 (v/v), affording 80 mg (79%) of **3la** (dr = 17:1); red solid, m.p. 138-140 °C;  $^1\text{H NMR}$  (400 MHz,  $\text{CDCl}_3$ ):  $\delta$  8.35-8.32 (m, 1H), 8.20-8.18 (m, 1H), 7.56-7.49 (m, 2H), 7.43-7.32 (m, 7H), 7.21 (m, 5H), 7.12-7.09 (m, 5H), 6.85 (dd,  $J = 12$  Hz, 8Hz 4H), 6.68 (dd,  $J = 8$ Hz, 8Hz 1H), 6.43-6.40 (m, 1H), 6.04 (s, 1H),

5.30-5.27 (m, 1H), 3.61-3.55 (m, 1H), 3.49 (dd,  $J = 16$  Hz, 4Hz 1H), 2.32 (s, 3H);  $^{13}\text{C}$  NMR (100MHz,  $\text{CDCl}_3$ ):  $\delta$  149.7, 141.6, 139.2, 138.5, 129.4, 128.8, 128.7, 128.6, 128.4, 127.6, 127.5, 126.9, 126.6, 126.4, 125.5, 122.4, 120.8, 117.1, 116.6, 116.1, 110.1, 109.2, 85.7, 67.4, 34.8, 21.4; HRMS-TOF-ES $^+$ : Calculated for  $\text{C}_{36}\text{H}_{30}\text{N}_2\text{OK}^+$  ( $[\text{M}+\text{K}]^+$ ): 545.1995, Found: 545.2003.

### Synthesis of **3ma**

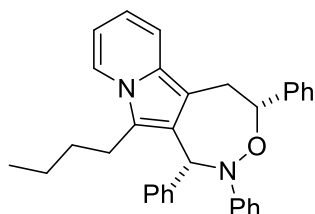

The reaction mixture was stirred for 15 hours at 100 °C until the reaction was complete (5 mol % catalyst used). Purified by chromatography on silica gel, eluting with PE/EA = 30:1 (v/v), affording 82 mg (80%) of **3ma** (dr = 10:1); yellow solid, m.p. 144-146 °C;  $^1\text{H}$  NMR (500 MHz,  $\text{CDCl}_3$ )  $\delta$  7.76 (d,  $J = 7.0$  Hz, 1H), 7.47 (d,  $J = 7.0$  Hz, 2H), 7.43-7.35 (m, 4H), 7.30 (t,  $J = 8.0$  Hz, 2H), 7.23-7.13 (m, 8H), 6.98 (t,  $J = 7.5$  Hz, 1H), 6.68-6.64 (m, 1H), 6.54 (t,  $J = 6.5$  Hz, 1H), 6.27 (s, 1H), 5.41 (dd,  $J = 3.5, 9.0$  Hz, 1H), 3.72-3.68 (m, 1H), 3.57-3.51 (m, 1H), 2.86-2.75 (m, 2H), 1.57-1.53 (m, 1H), 1.35-1.27 (m, 3H), 0.90 (t,  $J = 7.0$  Hz, 3H);  $^{13}\text{C}$  NMR (125 MHz,  $\text{CDCl}_3$ )  $\delta$  150.1, 141.7, 138.6, 129.6, 128.7, 128.3, 127.6, 127.4, 127.0, 126.5, 125.4, 121.4, 121.2, 120.8, 117.1, 116.7, 114.8, 109.8, 107.8, 86.0, 68.9, 33.9, 29.3, 24.0, 22.6, 13.8; HRMS  $m/z$  (ESI $^+$ ): Calculated for  $\text{C}_{33}\text{H}_{33}\text{N}_2\text{O}^+$  ( $[\text{M}+\text{H}]^+$ ): 473.2578, Found: 473.2590.

### Synthesis of **3na**

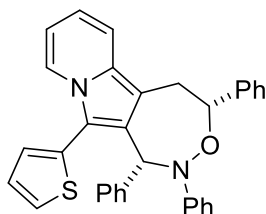

The reaction mixture was stirred for 42 hours at 100 °C until the reaction was complete (5 mol % catalyst used). Purified by chromatography on silica gel eluting with PE/EA = 30:1 (v/v), affording 59 mg (61%) of **3na** (dr = 25:1); yellow solid, m.p. 238-240 °C;  $^1\text{H}$  NMR (400 MHz,  $\text{CDCl}_3$ ):  $\delta$  8.05 (d,  $J = 8.0$  Hz 1H), 7.46 (d,  $J = 4.0$  Hz 1H), 7.37-7.32 (m, 7H), 7.19-7.16 (m, 6H), 7.12-7.11 (m, 1H), 7.06 (m, 2H), 6.94-6.92 (m, 2H), 6.85 (t,  $J = 8.0$  Hz 1H), 6.74-6.71 (m, 1H), 6.50-6.47 (m, 1H), 6.20

(s, 1H), 5.29 (q,  $J = 4.0$  Hz 1H), 3.56-3.46 (m, 2H);  $^{13}\text{C}$  NMR (100MHz,  $\text{CDCl}_3$ ):  $\delta$  149.7, 141.5, 138.9, 131.2, 131.0, 129.3, 129.1, 128.7, 128.4, 127.7, 127.5, 127.3, 126.9, 126.4, 122.9, 120.8, 117.2, 116.9, 116.0, 114.5, 110.5, 109.3, 85.6, 67.3, 34.5; HRMS-TOF-ES<sup>+</sup>: Calculated for  $\text{C}_{33}\text{H}_{26}\text{N}_2\text{OSK}^+$  ( $[\text{M}+\text{K}]^+$ ): 537.1403, Found: 537.1406.

### Synthesis of 30a (unsuccessful)

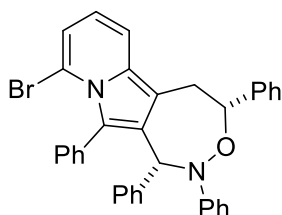

The reaction mixture was stirred for 12 hours at 100 °C until the reaction was complete (5 mol % catalyst used). Unfortunately, a complex mixture was obtained.

### Synthesis of 3pa

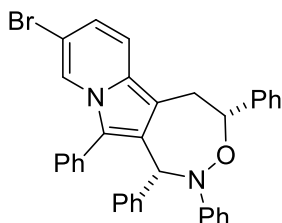

The reaction mixture was stirred for 31 hours at 100 °C until the reaction was complete (5 mol % catalyst used). Purified by chromatography on silica gel eluting with PE/EA = 30:1 (v/v), affording 72 mg (63%) of **3pa** (dr = 50:1); brown solid, m.p. 203-205 °C;  $^1\text{H}$  NMR (400 MHz,  $\text{CDCl}_3$ ):  $\delta$  8.03 (s, 1H), 7.43-7.31 (m, 9H), 7.25 (m, 2H), 7.18 (m, 3H), 7.16-7.12 (m, 2H), 7.05 (t,  $J = 4.0$  Hz 2H), 6.84 (t,  $J = 4.0$  Hz 3H), 6.75-6.72 (m, 1 H), 6.01 (s, 1H), 5.27 (q,  $J = 4.0$  Hz 1H), 3.55 (dd,  $J = 16.0$  Hz, 12.0 Hz 1H), 3.46 (dd,  $J = 16.0$  Hz, 4.0 Hz 1H);  $^{13}\text{C}$  NMR (100MHz,  $\text{CDCl}_3$ ):  $\delta$  149.5, 141.3, 138.8, 130.2, 129.3, 129.2, 128.7, 128.5, 128.4, 127.7, 127.6, 127.2, 127.0, 126.4, 122.9, 122.1, 120.9, 119.9, 117.9, 116.0, 110.7, 105.5, 85.4, 67.2, 34.7; HRMS-TOF-ES<sup>+</sup>: Calculated for  $\text{C}_{35}\text{H}_{27}\text{N}_2\text{OBrK}^+$  ( $[\text{M}+\text{K}]^+$ ): 609.0941, Found: 609.0944.

### Synthesis of **3qa**

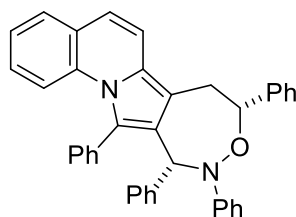

The reaction mixture was stirred for 12 hours at 100 °C until the reaction was complete (5 mol % catalyst used). Purified by chromatography on silica gel, eluting with PE/EA = 30:1 (v/v), affording 103 mg (95%) of **3qa** (dr = 20:1); yellow solid, m.p. 231-233 °C; <sup>1</sup>H NMR (500 MHz, CDCl<sub>3</sub>) δ 7.59-7.65 (m, 3H), 7.55-7.37 (m, 8H), 7.27-7.04 (m, 12H), 6.89-6.82 (m, 3H), 5.93 (s, 1H), 5.35 (dd, *J* = 2.5, 10.5 Hz, 1H), 3.64-3.52 (m, 2H); <sup>13</sup>C NMR (125 MHz, CDCl<sub>3</sub>) δ 149.6, 141.5, 139.2, 134.4, 134.3, 131.0, 130.5, 129.2, 129.1, 128.9, 128.8, 128.7, 128.5, 128.43, 128.38, 127.7, 127.52, 127.48, 126.8, 126.6, 126.5, 126.4, 125.3, 123.1, 120.6, 118.7, 117.0, 116.8, 115.6, 112.6, 85.5, 66.8, 34.8; HRMS *m/z* (ESI<sup>+</sup>): Calculated for C<sub>39</sub>H<sub>31</sub>N<sub>2</sub>O<sup>+</sup> ([M+H]<sup>+</sup>): 543.2431, Found: 543.2442.

### Synthesis of **3ra**

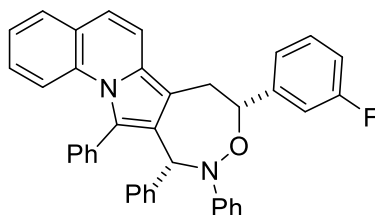

The reaction mixture was stirred for 12 hours at 100 °C until the reaction was complete (5 mol % catalyst used). Purified by chromatography on silica gel, eluting with PE/EA = 30:1 (v/v), affording 95 mg (87%) of **3ra** (dr = 11:1); yellow solid, m.p. 221-223 °C; <sup>1</sup>H NMR (500 MHz, CDCl<sub>3</sub>) δ 7.62 (t, *J* = 8.0 Hz, 3H), 7.53-7.50 (m, 1H), 7.39-7.34 (m, 3H), 7.26-7.16 (m, 9H), 7.09-7.04 (m, 6H), 6.88 (t, *J* = 7.5 Hz, 1H), 6.81 (d, *J* = 8.0 Hz, 2H), 5.88 (s, 1H), 5.34 (t, *J* = 6.5 Hz, 1H), 3.55-3.53 (m, 2H); <sup>13</sup>C NMR (125 MHz, CDCl<sub>3</sub>): δ 162.8 (d, *J* = 245.0 Hz), 149.5, 143.9 (d, *J* = 7.5 Hz), 139.0, 134.3 (d, *J* = 7.5 Hz), 131.0, 130.5, 129.9 (d, *J* = 7.5 Hz), 129.2, 129.1, 128.9, 128.8, 128.7, 128.52, 128.45, 127.6, 127.4, 126.9, 126.7, 126.6, 125.2, 123.1, 122.0 (d, *J* = 2.5 Hz), 120.8, 118.8, 116.8 (d, *J* = 48.8 Hz), 115.8, 114.5 (d, *J* = 21.3 Hz), 113.3 (d, *J* = 16.2 Hz), 112.2, 84.9, 67.2, 34.8; HRMS *m/z* (ESI<sup>+</sup>): Calculated for C<sub>39</sub>H<sub>30</sub>FN<sub>2</sub>O<sup>+</sup> ([M+H]<sup>+</sup>): 561.2337, Found: 561.2351.

### Synthesis of **3ab**



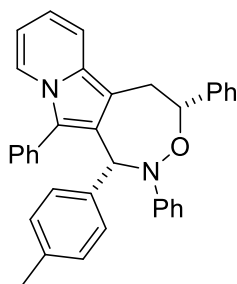

The reaction mixture was stirred for 36 hours at 100 °C until the reaction was complete (10 mol % catalyst used). Purified by chromatography on silica gel, eluting with PE/EA = 30:1 (v/v), affording 96 mg (95%) of **3ab** (dr = 20:1); yellow solid, m.p. 195-197 °C; <sup>1</sup>H NMR (500 MHz, CDCl<sub>3</sub>) δ 8.01 (d, *J* = 7.0 Hz, 1H), 7.49-7.35 (m, 11H), 7.19 (t, *J* = 8.0 Hz, 2H), 7.07 (s, 4H), 6.92-6.87 (m, 3H), 6.75-6.71 (m, 1H), 6.46 (t, *J* = 6.5 Hz, 1H), 6.10 (s, 1H), 5.33 (dd, *J* = 2.0, 11.0 Hz, 1H), 3.68-3.61 (m, 1H), 3.55-3.50 (m, 1H), 2.37 (s, 3H); <sup>13</sup>C NMR (125 MHz, CDCl<sub>3</sub>) δ 149.7, 141.6, 136.3, 136.2, 131.0, 130.2, 130.1, 129.2, 128.9, 128.6, 128.4, 127.9, 127.6, 126.9, 126.4, 122.3, 122.2, 120.6, 117.1, 116.6, 115.9, 110.1, 109.3, 85.7, 77.3, 77.0, 76.8, 66.8, 34.8, 21.1; HRMS *m/z* (ESI<sup>+</sup>): Calculated for C<sub>36</sub>H<sub>31</sub>N<sub>2</sub>O<sup>+</sup> ([M+H]<sup>+</sup>): 507.2431, Found: 507.2444.

### Synthesis of **3ac**

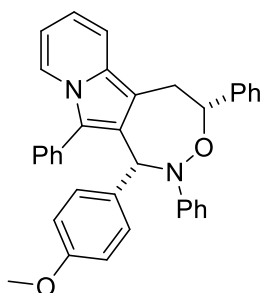

The reaction mixture was stirred for 19 hours at 100 °C until the reaction was complete (5 mol % catalyst used). Purified by chromatography on silica gel, eluting with PE/EA = 30:1 (v/v), affording 94 mg (89%) of **3ac** (dr = 12:1); yellow solid, m.p. 193-195 °C; <sup>1</sup>H NMR (500 MHz, CDCl<sub>3</sub>) δ 8.00 (d, *J* = 7.0 Hz, 1H), 7.49-7.35 (m, 11H), 7.19 (t, *J* = 8.0 Hz, 2H), 7.07 (d, *J* = 8.5 Hz, 2H), 6.92-6.87 (m, 3H), 6.79 (d, *J* = 8.5 Hz, 2H), 6.74-6.70 (m, 1H), 6.45 (t, *J* = 6.5 Hz, 1H), 6.07 (s, 1H), 5.34 (d, *J* = 9.0 Hz, 1H), 3.82 (s, 3H), 3.67-3.52 (m, 2H); <sup>13</sup>C NMR (125 MHz, CDCl<sub>3</sub>) δ 158.5, 149.8, 141.7, 131.5, 131.0, 130.4, 130.2, 128.9, 128.6, 128.3, 127.9, 127.6, 127.0, 126.4, 122.3, 122.1, 120.7, 117.1, 116.6, 116.1, 113.0, 110.1, 109.2, 85.7, 66.9, 55.0, 34.8; HRMS *m/z* (ESI<sup>+</sup>): Calculated for C<sub>36</sub>H<sub>31</sub>N<sub>2</sub>O<sub>2</sub><sup>+</sup> ([M+H]<sup>+</sup>): 523.2380, Found: 523.2395.

### Synthesis of **3ad**

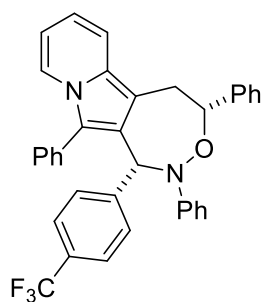

The reaction mixture was stirred for 13 hours at 100 °C until the reaction was complete (5 mol % catalyst used). Purified by chromatography on silica gel, eluting with PE/EA = 30:1 (v/v), affording 100 mg (88%) of **3ad** (dr = 10:1); yellow solid, m.p. 208-210 °C; <sup>1</sup>H NMR (500 MHz, CDCl<sub>3</sub>) δ 7.94 (d, *J* = 7.0 Hz, 1H), 7.48-7.35 (m, 12H), 7.25-7.16 (m, 5H), 6.91-6.86 (m, 3H), 6.75-6.71 (m, 1H), 6.46 (t, *J* = 6.5 Hz, 1H), 6.11 (s, 1H), 5.32 (t, *J* = 6.5 Hz, 1H), 3.55 (d, *J* = 6.5 Hz, 2H); <sup>13</sup>C NMR (125 MHz, CDCl<sub>3</sub>) δ 149.3, 143.3, 141.3, 130.8, 130.3, 130.1, 129.6, 129.2, 129.20, 129.1, 129.0, 128.8, 128.7, 128.5, 128.2, 127.8, 126.4, 125.8, 125.4, 124.6 (q, *J* = 3.8 Hz), 123.2, 122.4, 121.2, 117.1, 116.9, 116.0, 110.4, 109.0, 85.7, 66.9, 34.4; HRMS *m/z* (ESI<sup>+</sup>): Calculated for C<sub>36</sub>H<sub>28</sub>F<sub>3</sub>N<sub>2</sub>O<sup>+</sup> ([M+H]<sup>+</sup>): 561.2148, Found: 561.2159.

### Synthesis of **3ae**

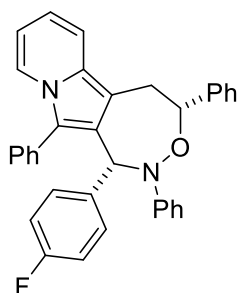

The reaction mixture was stirred for 13 hours at 100 °C until the reaction was complete (10 mol % catalyst used). Purified by chromatography on silica gel, eluting with PE/EA = 30:1 (v/v), affording 82 mg (80%) of **3ae** (dr = 20:1); yellow solid, m.p. 216-218 °C; <sup>1</sup>H NMR (500 MHz, CDCl<sub>3</sub>) δ 7.94 (d, *J* = 7.0 Hz, 1H), 7.49-7.32 (m, 10H), 7.16 (t, *J* = 8.0 Hz, 2H), 7.07-7.03 (m, 2H), 6.90-6.83 (m, 5H), 6.73-6.69 (m, 1H), 6.44 (t, *J* = 6.5 Hz, 1H), 6.01 (s, 1H), 5.31-5.27 (m, 1H), 3.55-3.50 (m, 2H); <sup>13</sup>C NMR (125 MHz, CDCl<sub>3</sub>) δ 161.9 (d, *J* = 263.8 Hz), 149.5, 141.5, 135.0 (d, *J* = 2.5 Hz), 130.93, 130.87, 130.2, 130.1, 129.0, 128.7, 128.4, 128.1, 127.7, 126.5, 126.4, 122.3, 122.2, 121.0, 117.1, 116.8, 116.2, 114.4 (d, *J* = 21.3 Hz), 110.3, 109.0, 85.6, 66.9, 34.6; HRMS *m/z* (ESI<sup>+</sup>): Calculated for C<sub>35</sub>H<sub>28</sub>FN<sub>2</sub>O<sup>+</sup> ([M+H]<sup>+</sup>): 511.2180, Found: 511.2182.

### Synthesis of **3af**

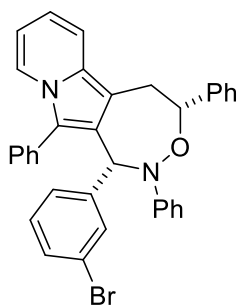

The reaction mixture was stirred for 22 hours at 100 °C until the reaction was complete (5 mol % catalyst used). Purified by chromatography on silica gel, eluting with PE/EA = 30:1 (v/v), affording 85 mg (74%) of **3af** (dr = 10:1); yellow solid, m.p. 178-180 °C; <sup>1</sup>H NMR (500 MHz, CDCl<sub>3</sub>) δ 7.96 (d, *J* = 7.0 Hz, 1H), 7.49-7.31 (m, 13H), 7.18 (t, *J* = 8.0 Hz, 2H), 7.07 (t, *J* = 8.0 Hz, 1H), 7.02 (d, *J* = 7.5 Hz, 1H), 6.90-6.85 (m, 3H), 6.75-6.71 (m, 1H), 6.46 (t, *J* = 6.5 Hz, 1H), 6.03 (s, 1H), 5.31 (dd, *J* = 3.5, 9.0 Hz, 1H), 3.61-3.51 (m, 2H); <sup>13</sup>C NMR (125 MHz, CDCl<sub>3</sub>) δ 149.3, 141.5, 141.4, 132.4, 130.8, 130.2, 130.0, 129.1, 129.0, 128.7, 128.4, 128.2, 127.8, 127.8, 126.4, 125.8, 122.3, 121.8, 121.1, 117.2, 116.8, 116.1, 110.3, 109.0, 85.5, 66.9, 34.5; HRMS *m/z* (ESI<sup>+</sup>): Calculated for C<sub>35</sub>H<sub>28</sub>BrN<sub>2</sub>O<sup>+</sup> ([M+H]<sup>+</sup>): 571.1380, Found: 571.1373.

### Synthesis of **3ag**

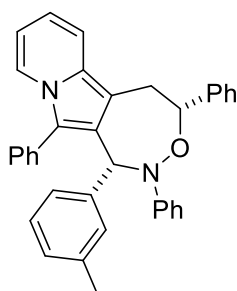

The reaction mixture was stirred for 19 hours at 100 °C until the reaction was complete (5 mol % catalyst used). Purified by chromatography on silica gel, eluting with PE/EA = 30:1 (v/v), affording 87 mg (86%) of **3ag** (dr = 10:1); yellow solid; m.p. 197-199 °C. <sup>1</sup>H NMR (500 MHz, CDCl<sub>3</sub>) δ 8.02 (d, *J* = 7.0 Hz, 1H), 7.50-7.36 (m, 11H), 7.21-7.14 (m, 3H), 7.10 (d, *J* = 7.5 Hz, 1H), 7.02-6.97 (m, 2H), 6.91-6.87 (m, 3H), 6.75-6.71 (m, 1H), 6.47 (t, *J* = 6.5 Hz, 1H), 6.10 (s, 1H), 5.34-5.31 (m, 1H), 3.68-3.61 (m, 1H), 3.55-3.51 (m, 1H), 2.31 (s, 3H); <sup>13</sup>C NMR (125 MHz, CDCl<sub>3</sub>) δ 149.6, 141.6, 139.1, 136.9, 131.0, 130.2, 130.1, 128.9, 128.6, 128.3, 127.9, 127.7, 127.5, 126.8, 126.4, 122.3, 120.6, 117.1, 116.6, 115.9, 110.1, 109.4, 85.4, 66.8, 34.7, 21.5; HRMS *m/z* (ESI<sup>+</sup>): Calculated for C<sub>36</sub>H<sub>31</sub>N<sub>2</sub>O<sup>+</sup> ([M+H]<sup>+</sup>): 507.2431, Found: 507.2443.

### Synthesis of **3ah**

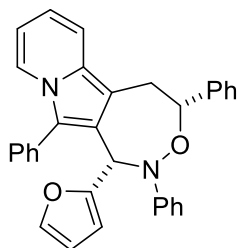

The reaction mixture was stirred for 11 hours at 100 °C until the reaction was complete (5 mol % catalyst used). Purified by chromatography on silica gel, eluting with PE/EA = 30:1 (v/v), affording 86 mg (86%) of **3ah** (dr = 12:1); yellow solid, m.p. 180-182 °C; <sup>1</sup>H NMR (500 MHz, CDCl<sub>3</sub>) δ 7.99 (d, *J* = 7.5 Hz, 1H), 7.56-7.35 (m, 12H), 7.21 (t, *J* = 8.0 Hz, 2H), 6.97-6.94 (m, 2H), 6.92 (t, *J* = 7.5 Hz, 1H), 6.73-6.69 (m, 1H), 6.45 (t, *J* = 6.5 Hz, 1H), 6.32 (s, 1H), 6.05 (s, 2H), 5.32 (d, *J* = 10.0 Hz, 1H), 3.68 (dd, *J* = 11.0, 15.5 Hz, 1H), 3.48 (dd, *J* = 2.0, 15.5 Hz, 1H); <sup>13</sup>C NMR (125 MHz, CDCl<sub>3</sub>) δ 153.2, 150.0, 141.8, 141.6, 130.7, 130.1, 129.1, 128.5, 128.4, 128.1, 127.7, 127.2, 126.4, 125.0, 122.4, 122.1, 121.3, 117.2, 116.7, 116.2, 110.2, 109.9, 109.5, 109.3, 86.4, 62.0, 34.5; HRMS *m/z* (ESI<sup>+</sup>): Calculated for C<sub>33</sub>H<sub>27</sub>N<sub>2</sub>O<sub>2</sub><sup>+</sup> ([M+H]<sup>+</sup>): 483.2067, Found: 483.2078.

#### Synthesis of **3ai** (unsuccessful)

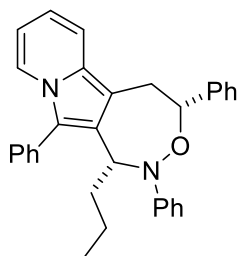

The reaction mixture was stirred for 12 hours at 100 °C until the reaction was complete (5 mol % catalyst used). Unfortunately, no desired product was detected.

#### Synthesis of **3aj**

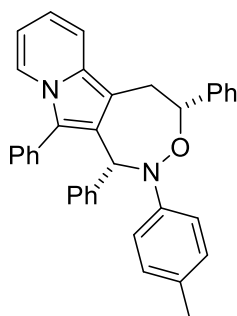

The reaction mixture was stirred for 7 hours at 100 °C until the reaction was complete (5 mol % catalyst used). Purified by chromatography on silica gel, eluting with PE/EA = 30:1 (v/v), affording 91 mg (90%) of **3aj** (dr = 10:1); yellow solid, m.p. 183-185 °C;

$^1\text{H}$  NMR (500 MHz,  $\text{CDCl}_3$ )  $\delta$  7.98 (d,  $J = 7.0$  Hz, 1H), 7.46-7.33 (m, 11H), 7.26-7.24 (m, 3H), 7.16-7.14 (m, 2H), 6.99 (d,  $J = 8.0$  Hz, 2H), 6.79 (d,  $J = 8.5$  Hz, 2H), 6.73-6.69 (m, 1H), 6.44 (t,  $J = 6.5$  Hz, 1H), 6.02 (s, 1H), 5.32 (dd,  $J = 2.0, 10.5$  Hz, 1H), 3.64-3.58 (m, 1H), 3.55-3.50 (m, 1H), 2.27 (s, 3H);  $^{13}\text{C}$  NMR (125 MHz,  $\text{CDCl}_3$ )  $\delta$  147.4, 141.7, 139.2, 131.0, 130.2, 129.5, 129.2, 128.9, 128.3, 127.9, 127.6, 127.5, 126.8, 126.4, 122.3, 122.2, 117.1, 116.6, 116.4, 110.1, 109.3, 85.3, 67.5, 34.7, 20.5; HRMS  $m/z$  (ESI $^+$ ): Calculated for  $\text{C}_{36}\text{H}_{31}\text{N}_2\text{O}^+$  ( $[\text{M}+\text{H}]^+$ ): 507.2431, Found: 507.2443.

### Synthesis of **3ak**

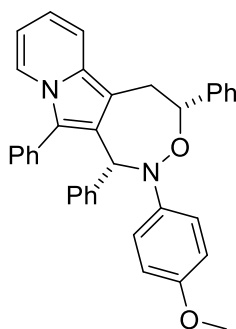

The reaction mixture was stirred for 18 hours at 100 °C until the reaction was complete (5 mol % catalyst used). Purified by chromatography on silica gel, eluting with PE/EA = 30:1 (v/v), affording 89 mg (85%) of **3ak** (dr = 8:1); yellow solid, m.p. 98-100 °C;  $^1\text{H}$  NMR (500 MHz,  $\text{CDCl}_3$ )  $\delta$  7.97 (d,  $J = 7.0$  Hz, 1H), 7.46-7.32 (m, 11H), 7.24-7.21 (m, 3H), 7.07 (d,  $J = 6.5$  Hz, 2H), 6.83 (d,  $J = 9.0$  Hz, 2H), 6.75-6.71 (m, 3H), 6.44 (t,  $J = 6.5$  Hz, 1H), 5.85 (s, 1H), 5.38-5.34 (m, 1H), 3.75 (s, 3H), 3.66-3.55 (m, 2H);  $^{13}\text{C}$  NMR (125 MHz,  $\text{CDCl}_3$ )  $\delta$  154.6, 143.8, 141.9, 138.8, 131.0, 130.2, 129.8, 128.8, 128.3, 127.9, 127.5, 127.4, 127.0, 126.8, 126.3, 122.3, 122.0, 118.5, 117.1, 116.6, 113.8, 110.1, 109.2, 85.7, 77.3, 77.0, 76.8, 69.3, 55.4, 34.9; HRMS  $m/z$  (ESI $^+$ ): Calculated for  $\text{C}_{36}\text{H}_{31}\text{N}_2\text{O}_2^+$  ( $[\text{M}+\text{H}]^+$ ): 523.2380, Found: 523.2390.

### Synthesis of **3al**

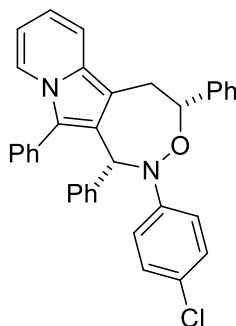

The reaction mixture was stirred for 43 hours at 100 °C until the reaction was complete (5 mol % catalyst used). Purified by chromatography on silica gel, eluting with PE/EA = 30:1 (v/v), affording 85 mg (81%) of **3al** (dr = 7:1); yellow solid, m.p. 192-194 °C;  $^1\text{H}$  NMR (500 MHz,  $\text{CDCl}_3$ )  $\delta$  7.98 (d,  $J = 7.0$  Hz, 1H), 7.49-7.35 (m,

10H), 7.28-7.24 (m, 4H), 7.15-7.10 (m, 4H), 6.78 (d,  $J = 9.0$  Hz, 2H), 6.74-6.70 (m, 1H), 6.45 (t,  $J = 6.5$  Hz, 1H), 6.01 (s, 1H), 5.29-5.26 (m, 1H), 3.63-3.57 (m, 1H), 3.53-3.48 (m, 1H);  $^{13}\text{C}$  NMR (125 MHz,  $\text{CDCl}_3$ )  $\delta$  148.3, 141.3, 138.8, 130.8, 130.2, 129.3, 129.0, 128.6, 128.4, 128.1, 127.8, 127.7, 127.1, 126.4, 126.3, 125.7, 122.37, 122.3, 117.3, 117.1, 116.8, 110.3, 109.1, 85.7, 67.3, 34.6; HRMS  $m/z$  (ESI $^+$ ): Calculated for  $\text{C}_{35}\text{H}_{28}\text{N}_2\text{ClO}^+$  ( $[\text{M}+\text{H}]^+$ ): 527.1885, Found: 527.1892.

### Synthesis of **3am**

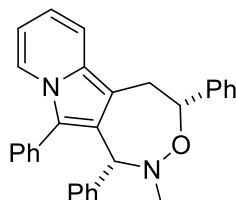

The reaction mixture was stirred for 14 hours at 100 °C until the reaction was complete (5 mol % catalyst used). Purified by chromatography on silica gel eluting with PE/EA = 30:1 (v/v), affording 68 mg (79%) of **3am** (dr > 99:1); brown solid, m.p. 140-142 °C;  $^1\text{H}$  NMR (400 MHz,  $\text{CDCl}_3$ ):  $\delta$  7.61 (d,  $J = 4.0$  Hz, 1H), 7.32 (s, 4H), 7.19 (m, 4H), 7.10-7.05 (m, 7H), 6.98-6.96 (m, 3H), 6.48 (t,  $J = 4.0$  Hz, 1H), 6.27-6.23 (m, 1H), 5.43 (d,  $J = 4.0$  Hz, 1H), 5.05 (s, 1H), 2.59 (s, 3H);  $^{13}\text{C}$  NMR (100 MHz,  $\text{CDCl}_3$ ):  $\delta$  141.8, 131.7, 130.9, 129.2, 128.8, 128.6, 128.5, 128.1, 127.8, 127.7, 127.6, 127.0, 126.9, 121.8, 121.5, 116.6, 115.7, 109.4, 82.5, 44.3, 30.2; HRMS-TOF-ES $^+$ : Calcd for  $\text{C}_{30}\text{H}_{26}\text{N}_2\text{OH}$  ( $[\text{M}+\text{H}]^+$ ): 430.2050, Found: 431.2100.

### The reaction of enantioenriched 2-(1-alkynyl)-cyclopropyl pyridines **1a** and nitrene **2a**.

Optical resolution of racemic 2-(1-alkynyl)-cyclopropyl pyridines **1a** with (2R,3R)-2,3-dibenzoyloxybutanedioic acid (DBTA) to afford chiral 2-(1-alkynyl)-cyclopropyl pyridines **1a**, ee = 96%.

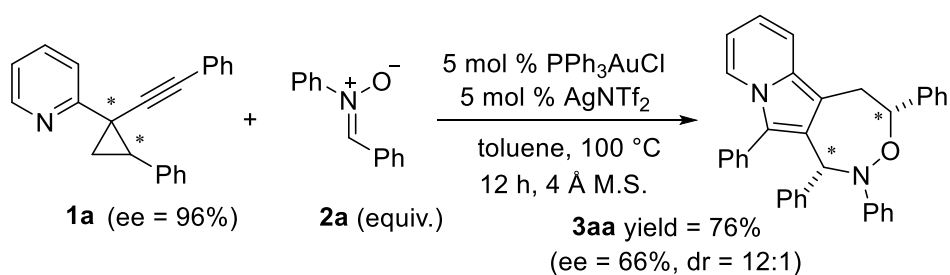

$\mathbf{3aa}$ , determined by HPLC, IA, Hexane/*i*-PrOH = 98/2, 0.5 mL/min, 254 nm;  $t_{\text{major}} = 10.26\text{ min}$ ,  $t_{\text{minor}} = 12.5\text{ min}$ ).

### Synthesis of 4

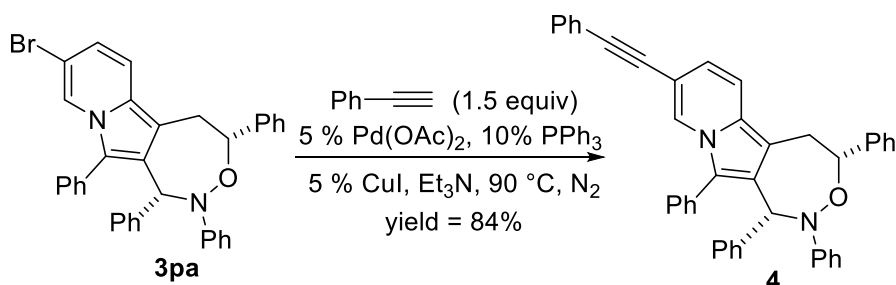

In a 25 mL tube, 5 mol% Pd(OAc)<sub>2</sub>, 10 mol% PPh<sub>3</sub>, the cycloadduct  $\mathbf{3pa}$  (0.2 mmol) and 5 mol% CuI were added, and the tube was evacuated and refilled with N<sub>2</sub> for 3 times. After that, degassed triethylamine (2 mL) and phenylacetylene (1.5 equiv.) were added via syringe, and the mixture was stirred at 90 °C for 17 hours until the reaction was complete (monitored by TLC, PE:EA = 20:1). Purified by chromatography on silica gel eluting with PE/EA = 100/1; yield = 84% (99 mg); yellow solid, m.p. 226-228 °C; <sup>1</sup>H NMR (400 MHz, CDCl<sub>3</sub>): δ 8.19 (s, 1H), 7.55-7.31 (m, 16H), 7.24-7.07 (m, 7H), 6.89-6.78 (m, 4H), 6.07 (s, 1H), 5.30 (dd, *J* = 10.4, 2.4 Hz, 1H), 3.62-3.46 (m, 2H); <sup>13</sup>C NMR (100 MHz, CDCl<sub>3</sub>): δ 149.5, 141.3, 138.8, 131.4, 130.2, 129.3, 129.1, 128.8, 128.7, 128.4, 128.3, 128.1, 127.8, 127.7, 127.65, 127.0, 126.4, 125.9, 123.1, 122.9, 120.9, 119.2, 116.8, 116.0, 110.5, 106.5, 89.2, 87.3, 85.4, 67.2, 34.7; HRMS-TOF-ES<sup>+</sup> : [M+H]<sup>+</sup> Calcd for C<sub>43</sub>H<sub>33</sub>N<sub>2</sub>O: 593.2590, Found: 593.2593.

### Synthesis of 5

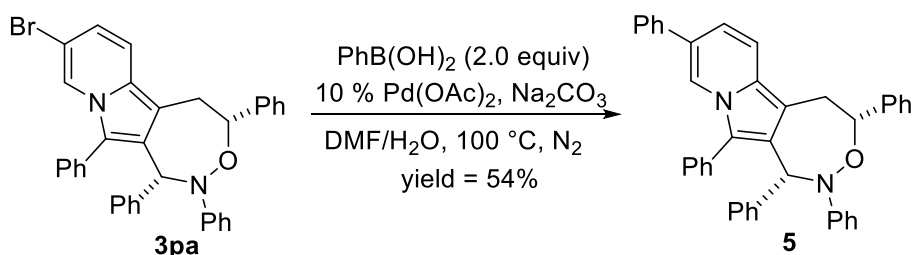

In a 25 mL tube, 10 mol% Pd(OAc)<sub>2</sub>, the cycloadduct **3pa** (0.2 mmol), phenylboric acid (2.0 equiv.) and Na<sub>2</sub>CO<sub>3</sub> (2.0 equiv.) were added, and the tube was evacuated and refilled with N<sub>2</sub> for 3 times. After that, degassed 3 mL of DMF/H<sub>2</sub>O (2/1) was added via syringe, and the mixture was stirred at 100 °C for 10 hours until the reaction was complete (monitored by TLC, PE:EA = 20:1). The reaction mixture was quenched with water (5 mL) and extracted with EA (3×5 mL), the organic phase was combined and washed with saturated NaCl(aq), and then dried over anhydrous MgSO<sub>4</sub>, concentrated via evaporator and purified by chromatography on silica gel eluting with PE/EA = 80/1; yield = 54% (61 mg); yellow solid, m.p. 220-222 °C; <sup>1</sup>H NMR (400 MHz, CDCl<sub>3</sub>): δ 8.15 (s, 1H), 7.52-7.28 (m, 16H), 7.25-7.20 (m, 3H), 7.17-7.09 (m, 4H), 7.03-6.96 (m, 1H), 6.88-6.80 (m, 3H), 6.06 (s, 1H), 5.29 (dd, *J* = 10.0, 2.0 Hz, 1H), 3.64-3.45 (m, 2H); <sup>13</sup>C NMR (100 MHz, CDCl<sub>3</sub>): δ 149.5, 141.5, 139.1, 138.6, 130.7, 130.1, 129.4, 129.3, 129.1, 128.8, 128.7, 128.4, 128.1, 127.7, 127.6, 127.2, 127.1, 126.9, 126.6, 126.4, 124.5, 122.8, 120.7, 119.8, 117.6, 117.2, 115.9, 109.5, 85.5, 67.0, 34.8; HRMS-TOF-ES<sup>+</sup> : [M+H]<sup>+</sup> Calcd for C<sub>41</sub>H<sub>33</sub>N<sub>2</sub>O: 569.2590, Found: 569.2593.

### Synthesis of 6

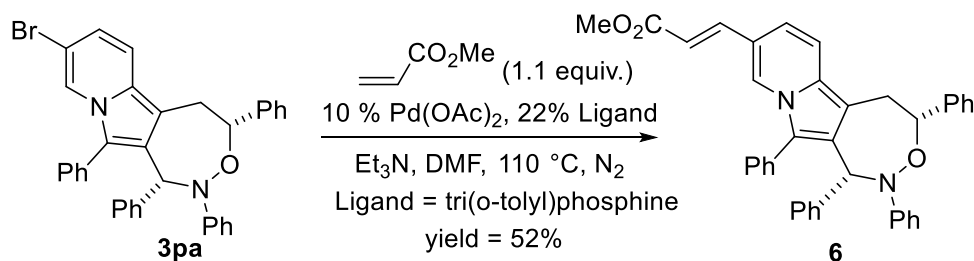

In a 25 mL tube, 10 mol% Pd(OAc)<sub>2</sub>, 22% tri(*o*-tolyl)phosphine and the cycloadduct **3pa** (0.2 mmol) were added, and the tube was evacuated and refilled with N<sub>2</sub> for 3 times. After that, methyl acrylate (1.1 equiv.), degassed Et<sub>3</sub>N (5.0 equiv.) and



degassed 2 mL of dry DMF was added via syringe, and the mixture was stirred at 110 °C for 13 hours until the reaction was complete (monitored by TLC, PE:EA = 20:1). The reaction mixture was quenched with water (5 mL) and extracted with EA (3×5 mL), the organic phase was combined and washed with saturated NaCl(aq), and then dried over anhydrous MgSO<sub>4</sub>, concentrated via evaporator and purified by chromatography on silica gel eluting with PE/EA = 80/1; yield = 52% (60 mg); red solid, m.p. 220-222 °C; <sup>1</sup>H NMR (400 MHz, CDCl<sub>3</sub>): δ 8.01 (s, 1H), 7.50-7.44 (m, 4H), 7.40-7.30 (m, 7H), 7.23-7.11 (m, 6H), 7.07-7.05 (m, 2H), 6.91 (d, *J* = 9.2 Hz, 1H), 6.87-6.80 (m, 3H), 6.29 (d, *J* = 16.0 Hz 1H), 6.02 (s, 1H), 5.25 (dd, *J* = 10.0, 2.8 Hz, 1H), 3.78 (s, 3H), 3.56-3.44 (m, 2H); <sup>13</sup>C NMR (100MHz, CDCl<sub>3</sub>): δ 167.5, 149.4, 142.3, 141.2, 138.7, 129.9, 129.5, 129.2, 129.18, 128.7, 128.6, 128.4, 128.2, 127.8, 127.7, 127.1, 126.4, 126.2, 123.9, 120.9, 118.7, 117.6, 116.0, 115.5, 113.6, 111.6, 85.3, 67.1, 51.6, 34.7; HRMS-TOF-ES<sup>+</sup>: [M+H]<sup>+</sup> Calcd for C<sub>39</sub>H<sub>33</sub>N<sub>2</sub>O<sub>3</sub>: 577.2485, Found: 577.2491.

$^1\text{H}$  and  $^{13}\text{C}$  NMR spectra of new 2-(1-alkynyl)-cyclopropyl pyridines.

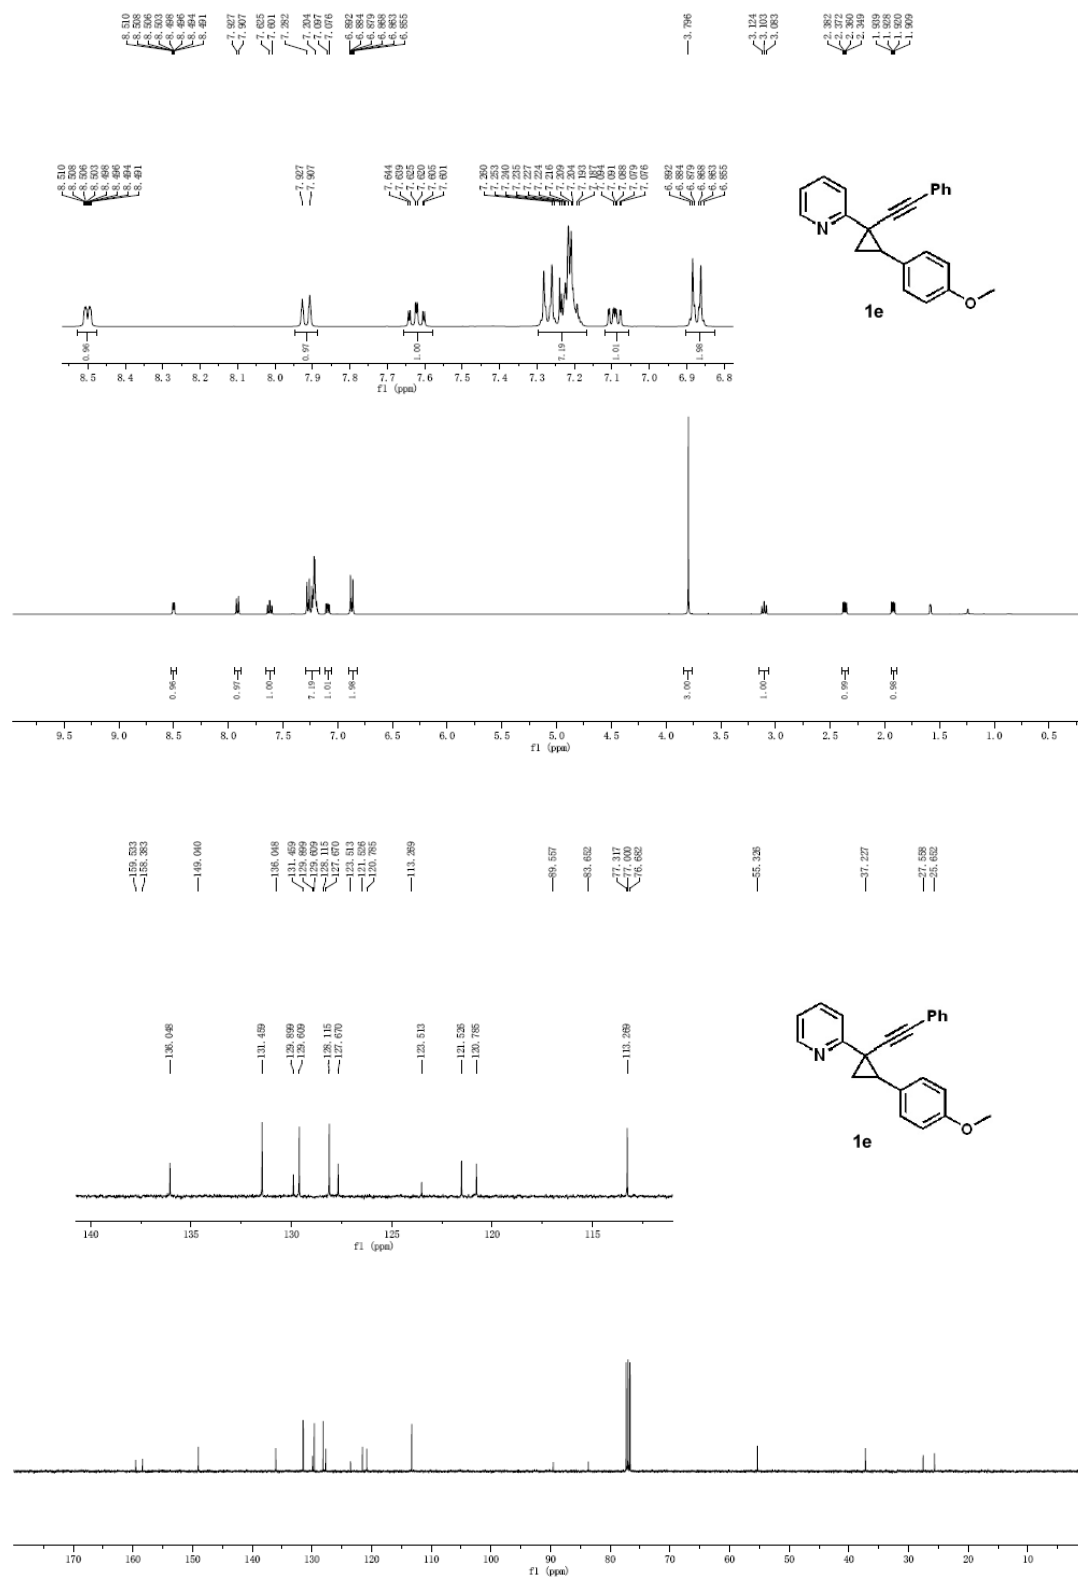

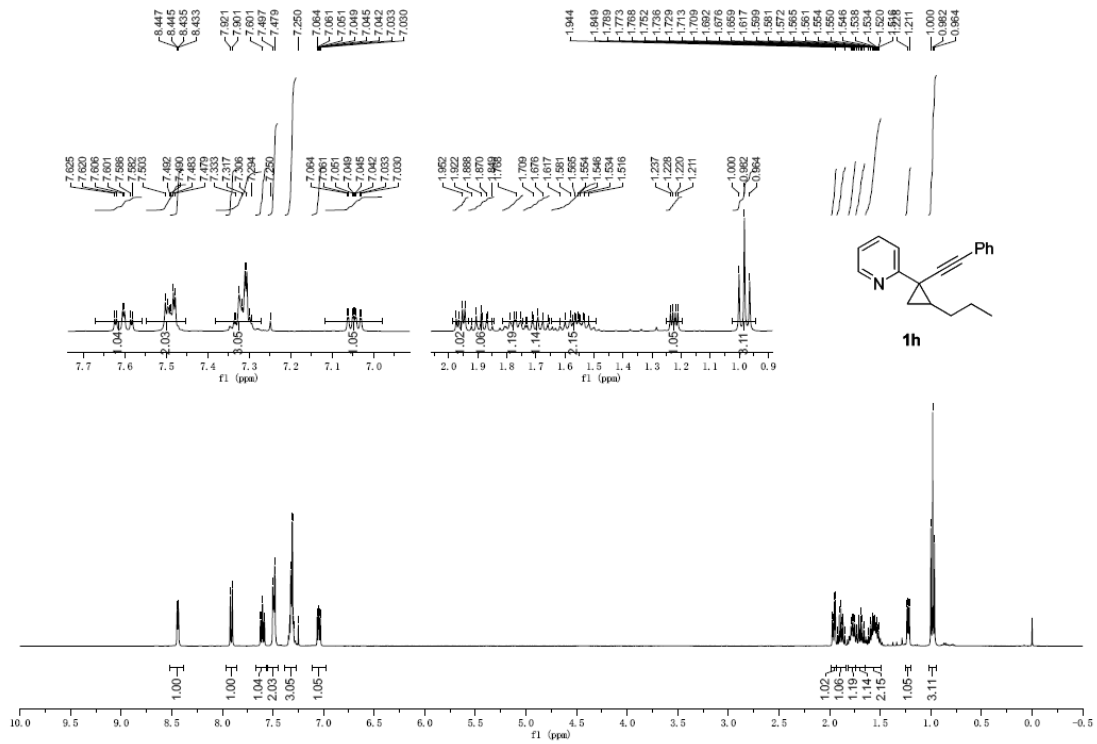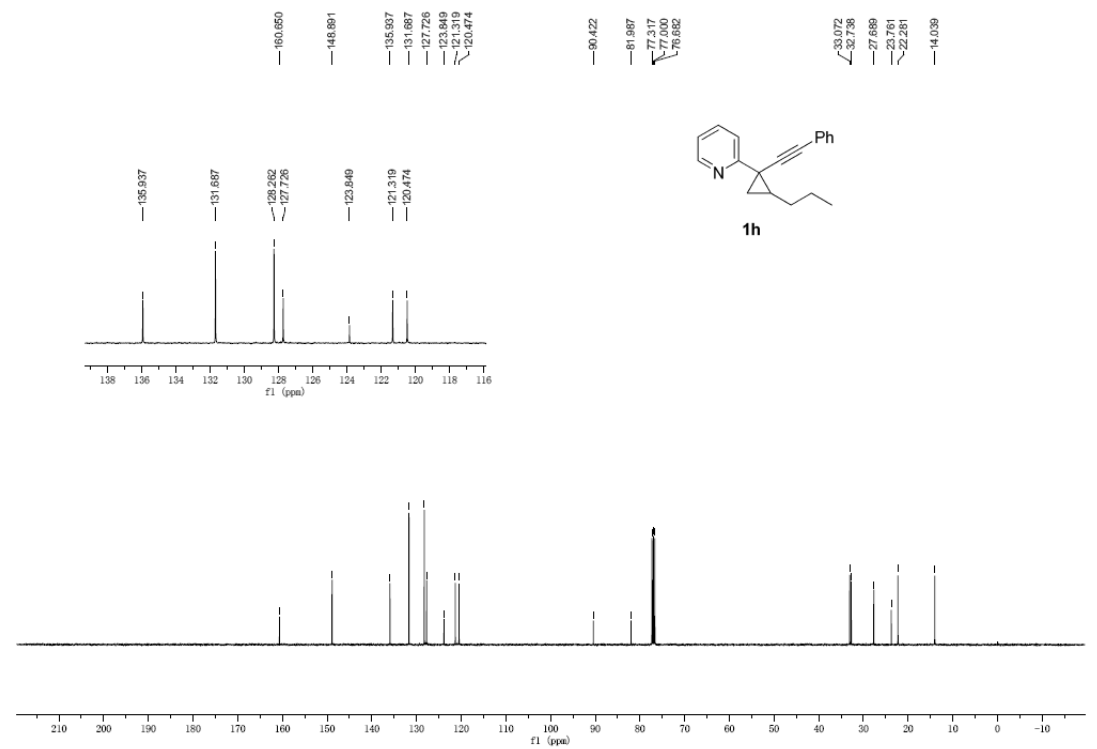

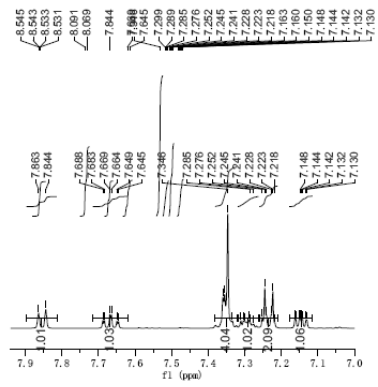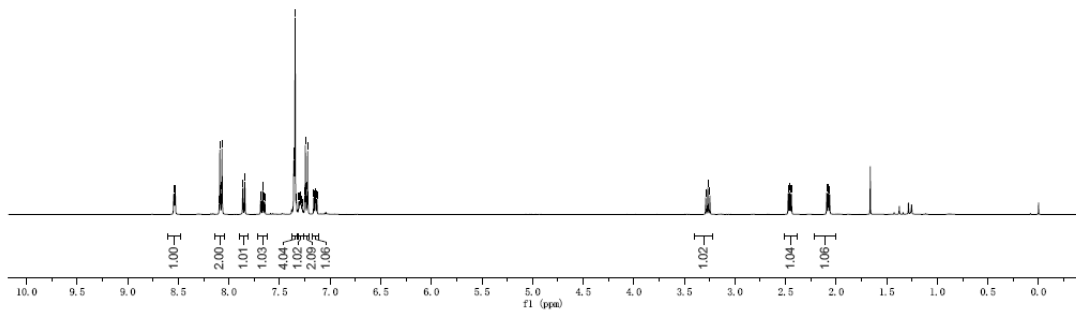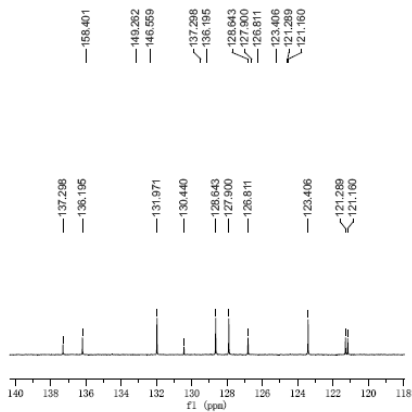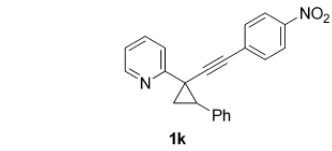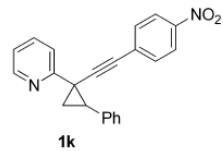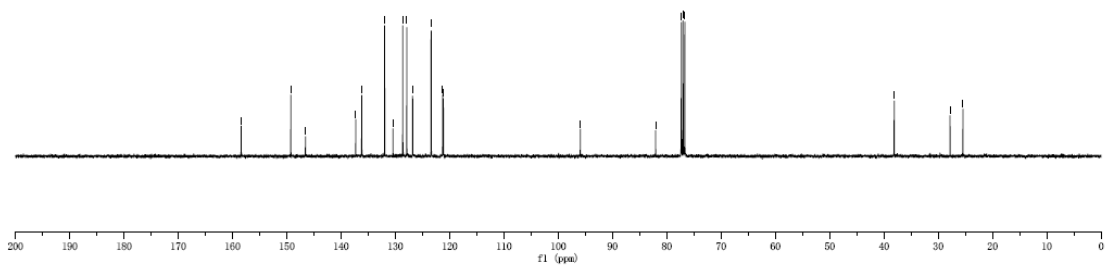

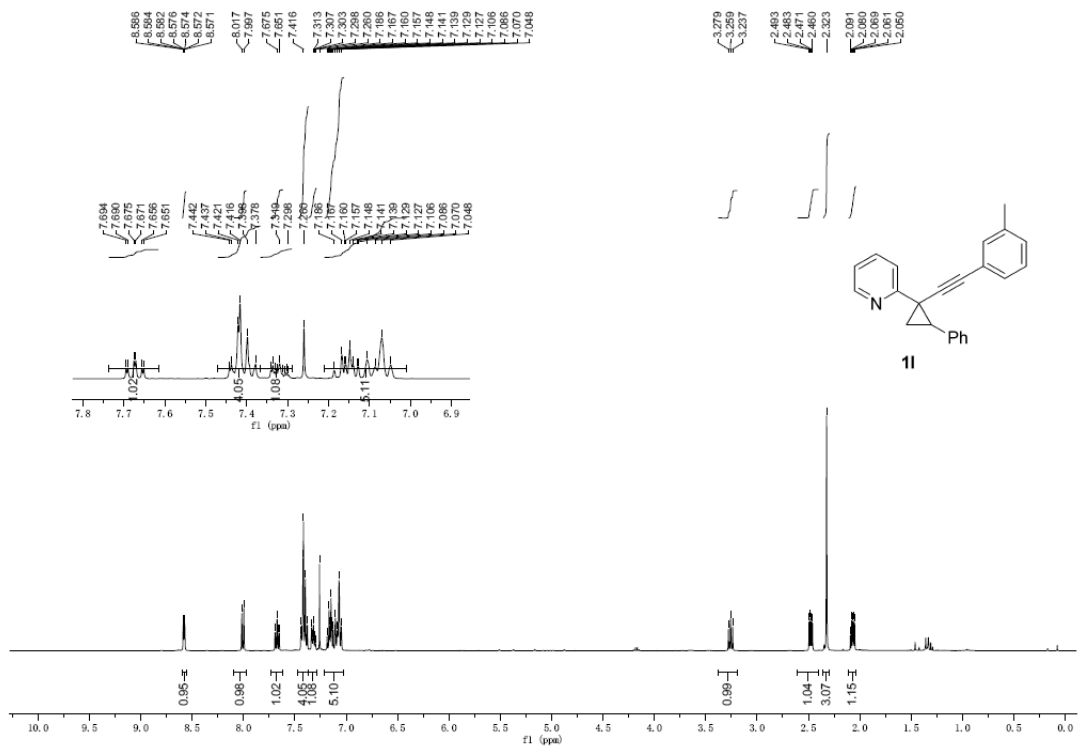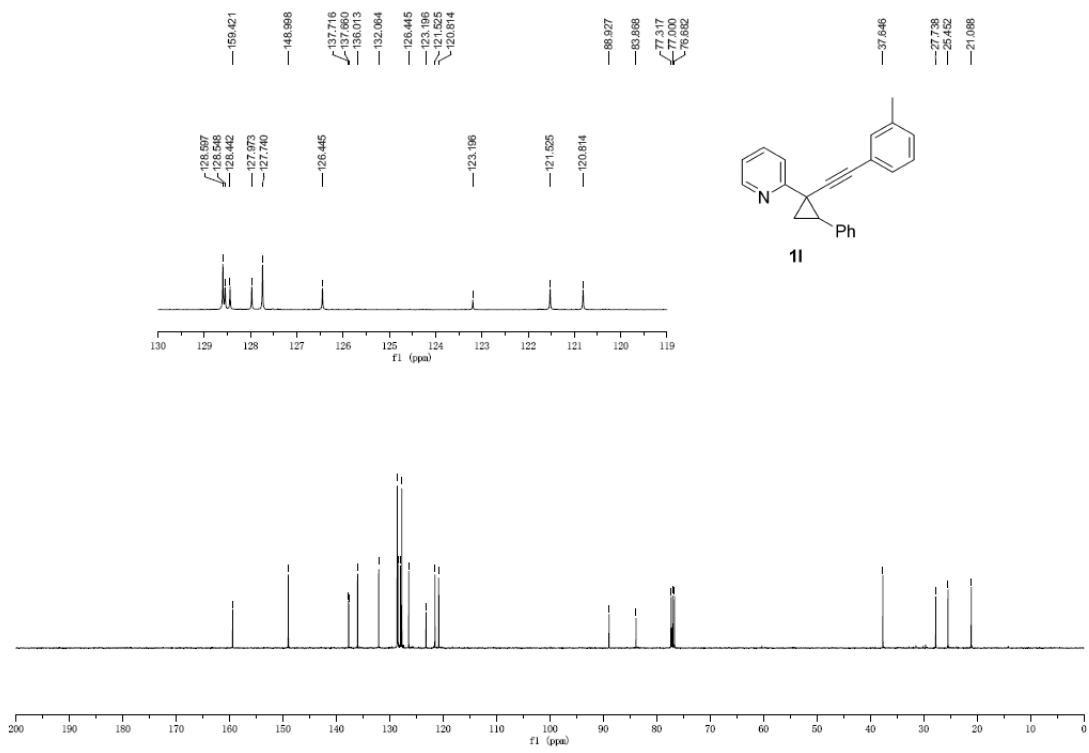

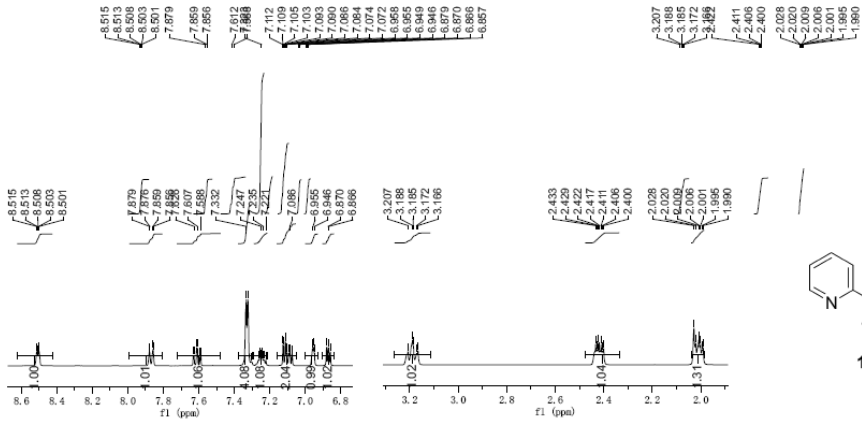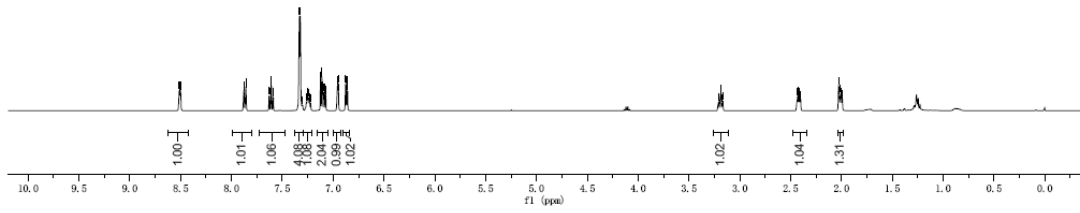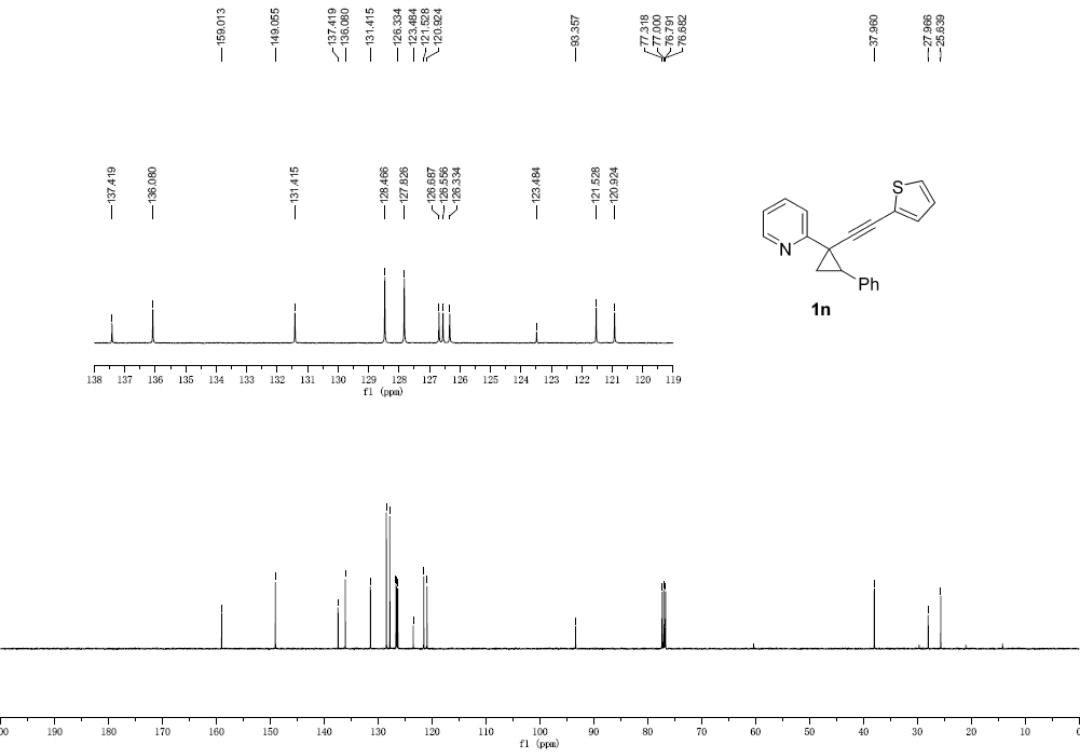



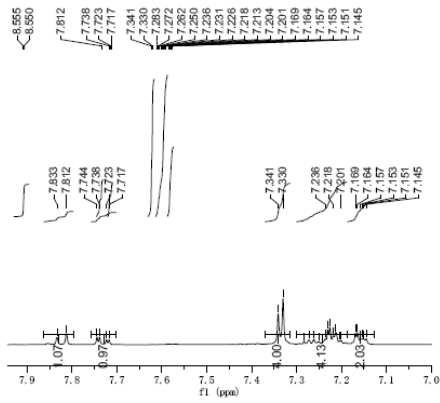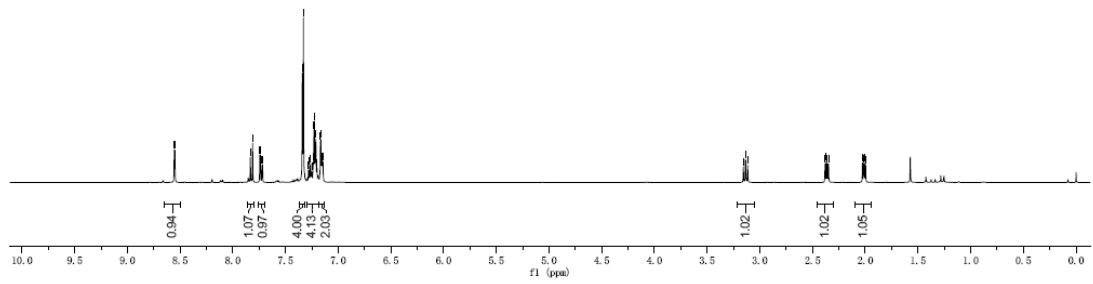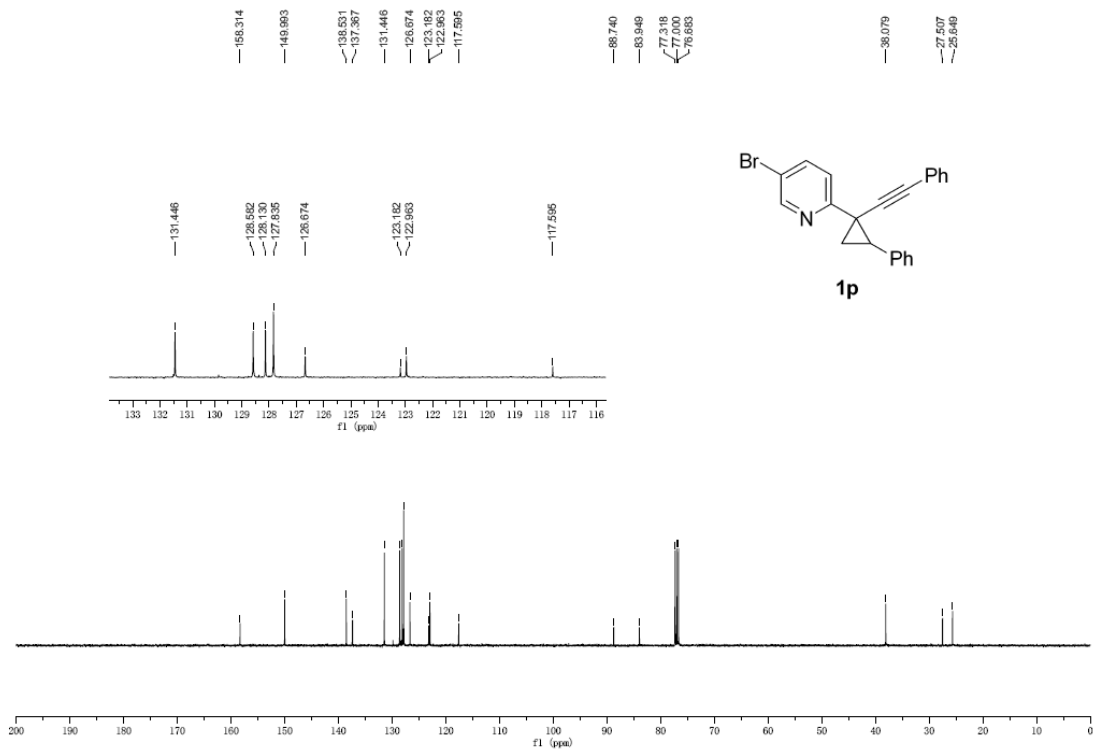



# $^1\text{H}$ and $^{13}\text{C}$ NMR spectra of products

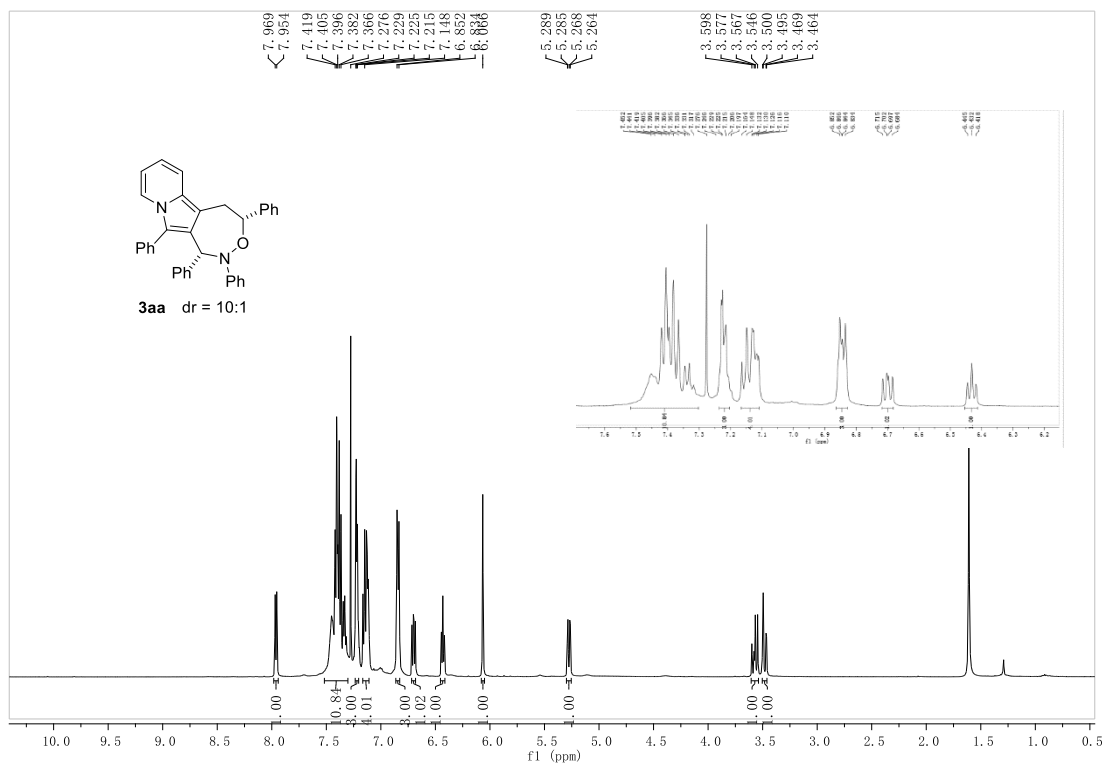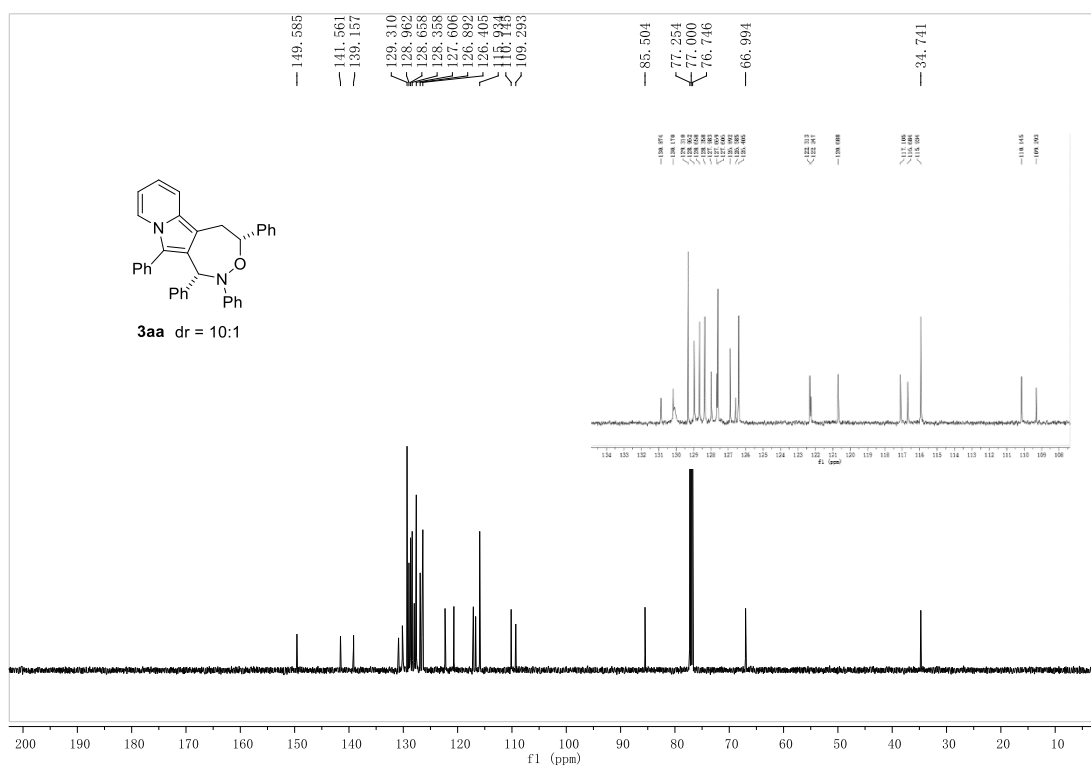

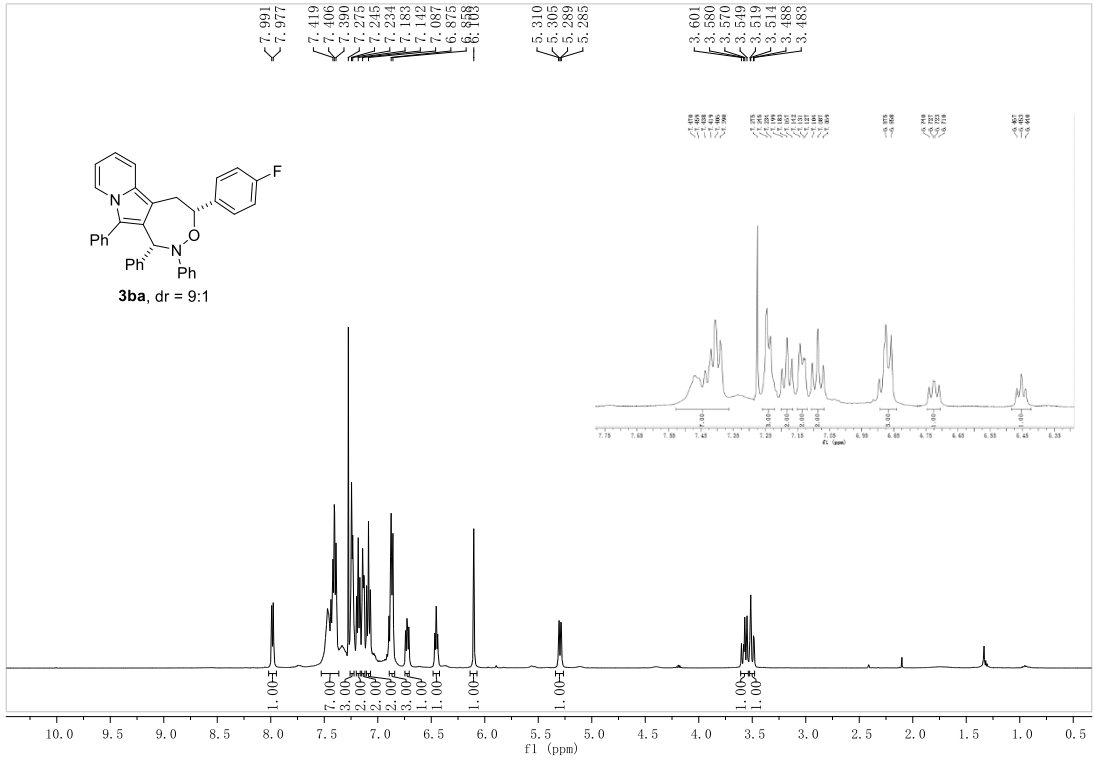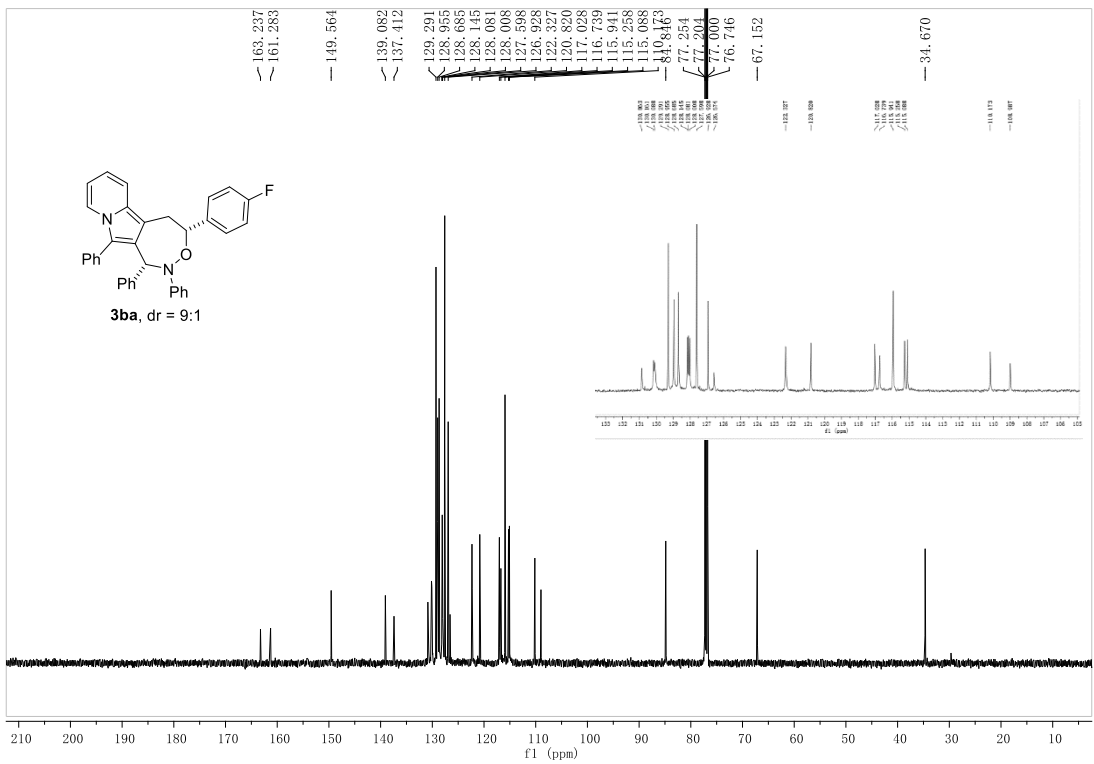

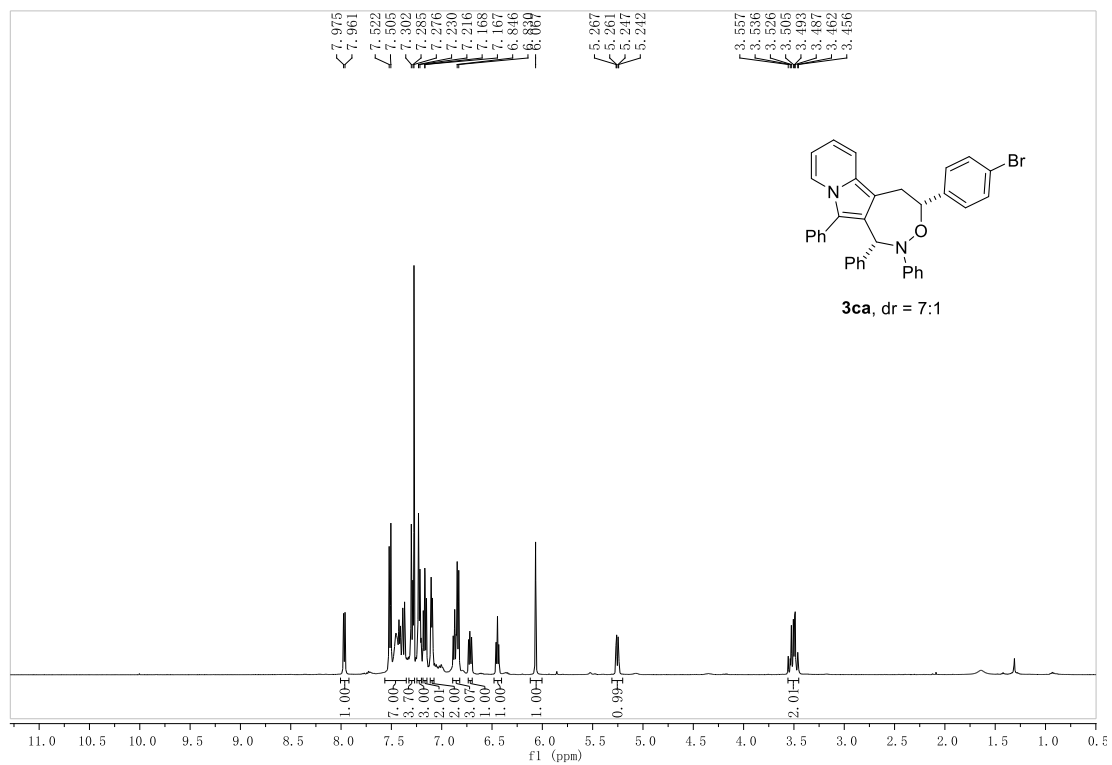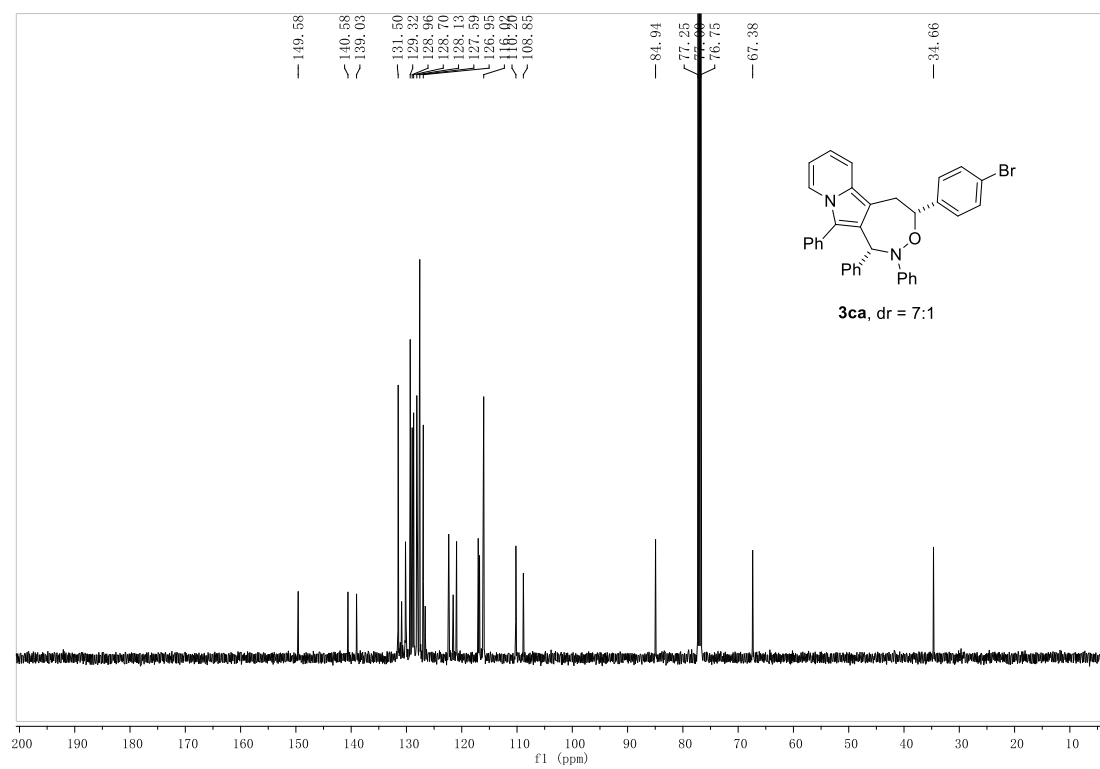

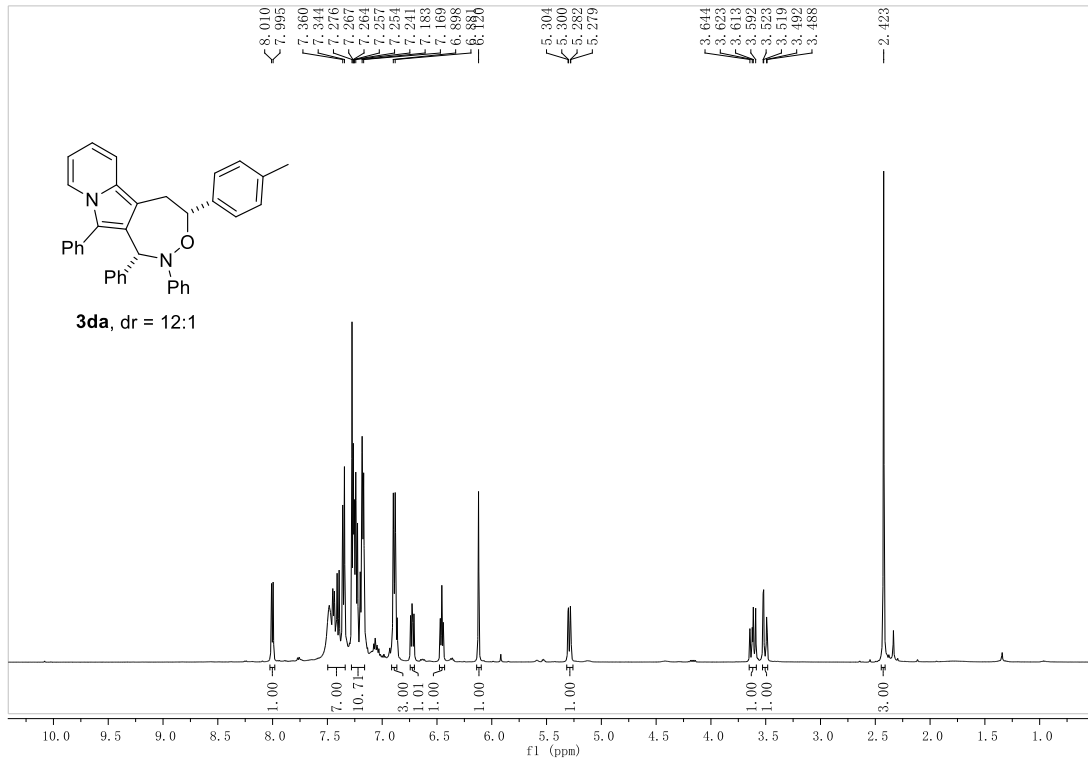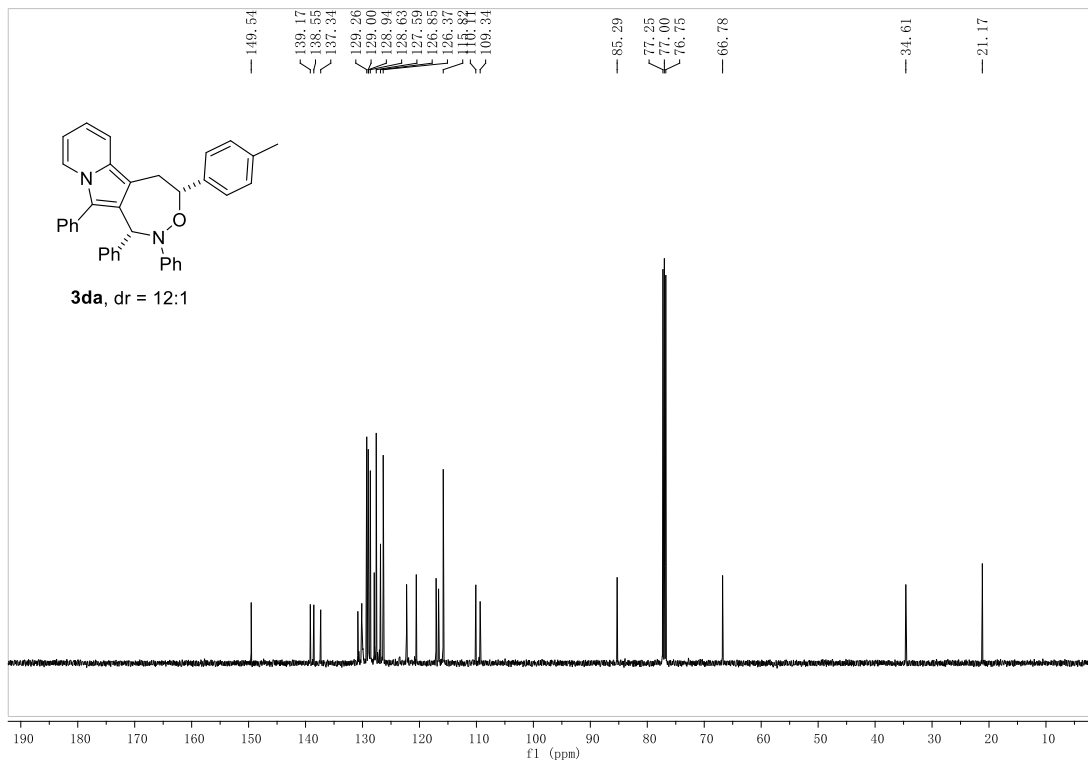

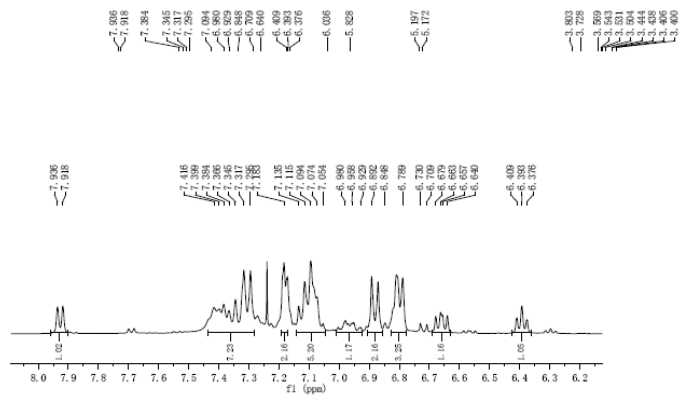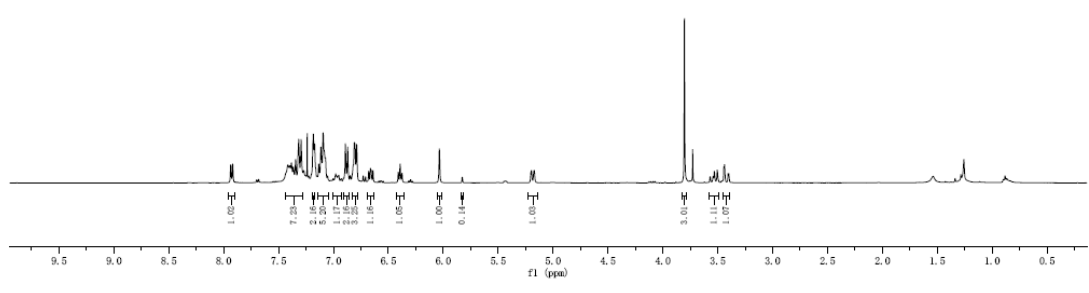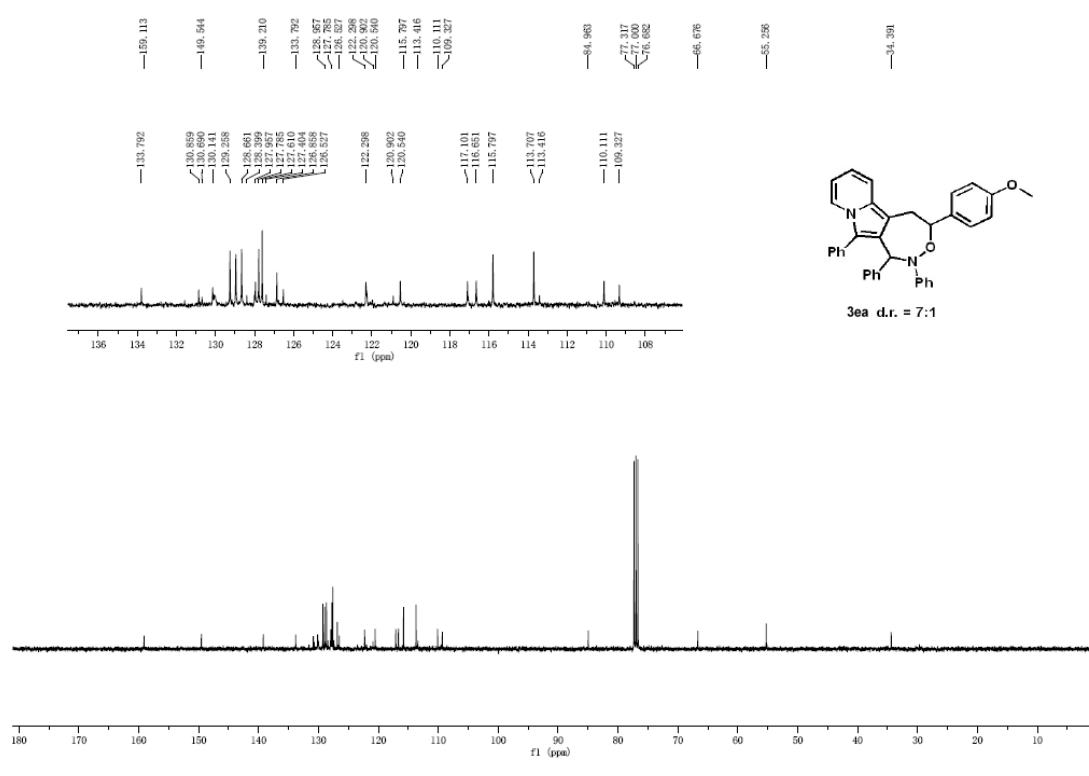

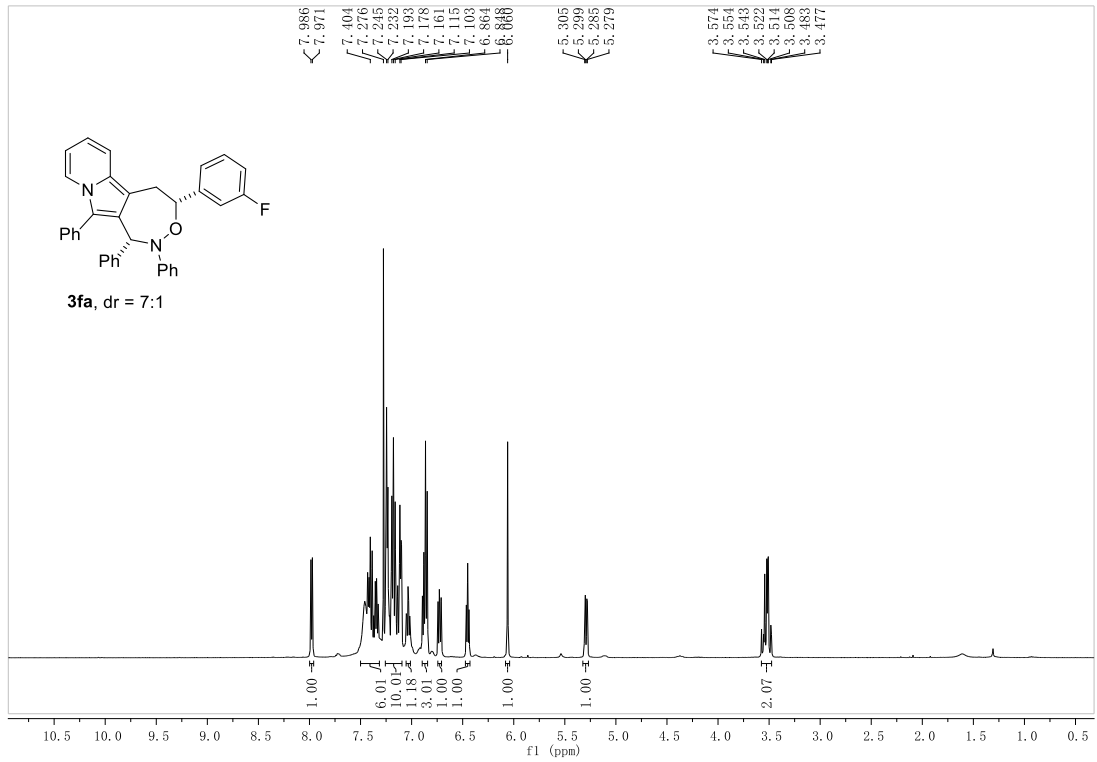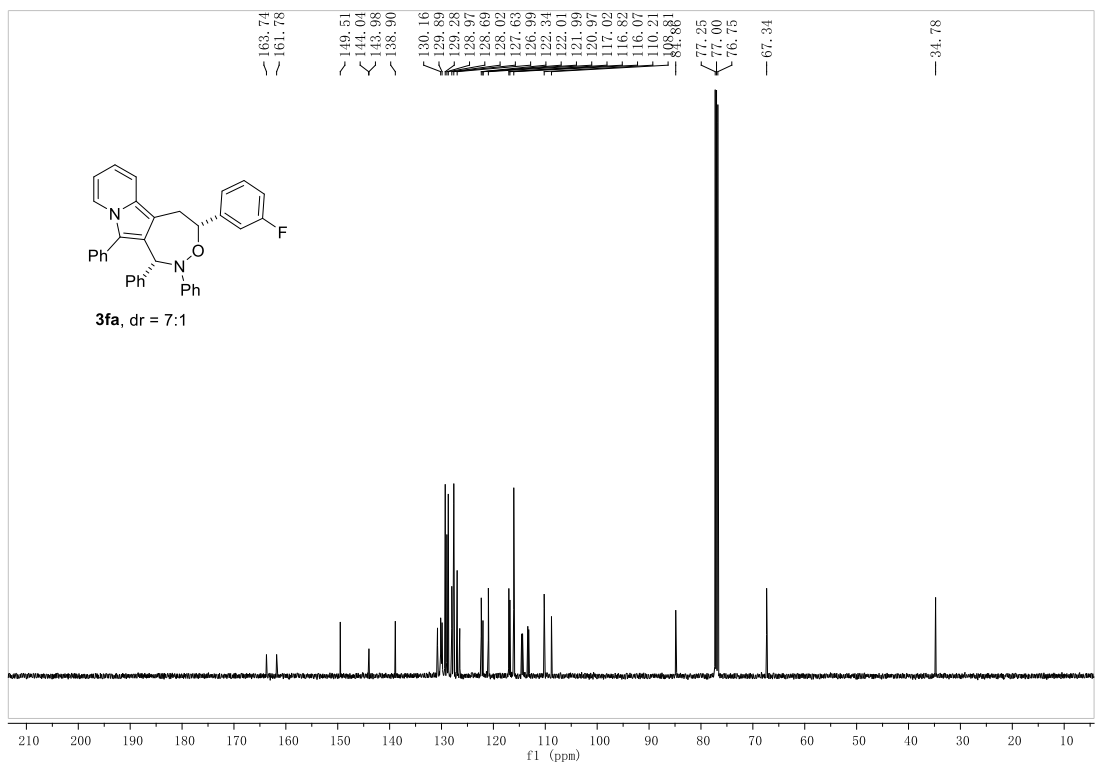

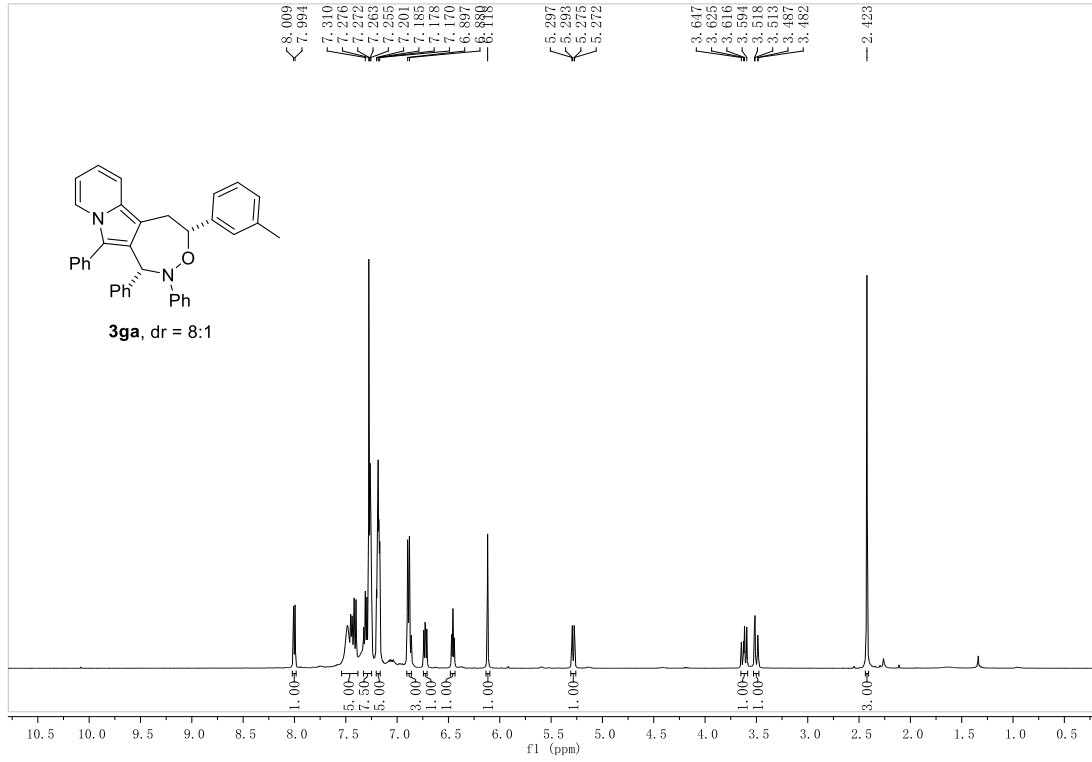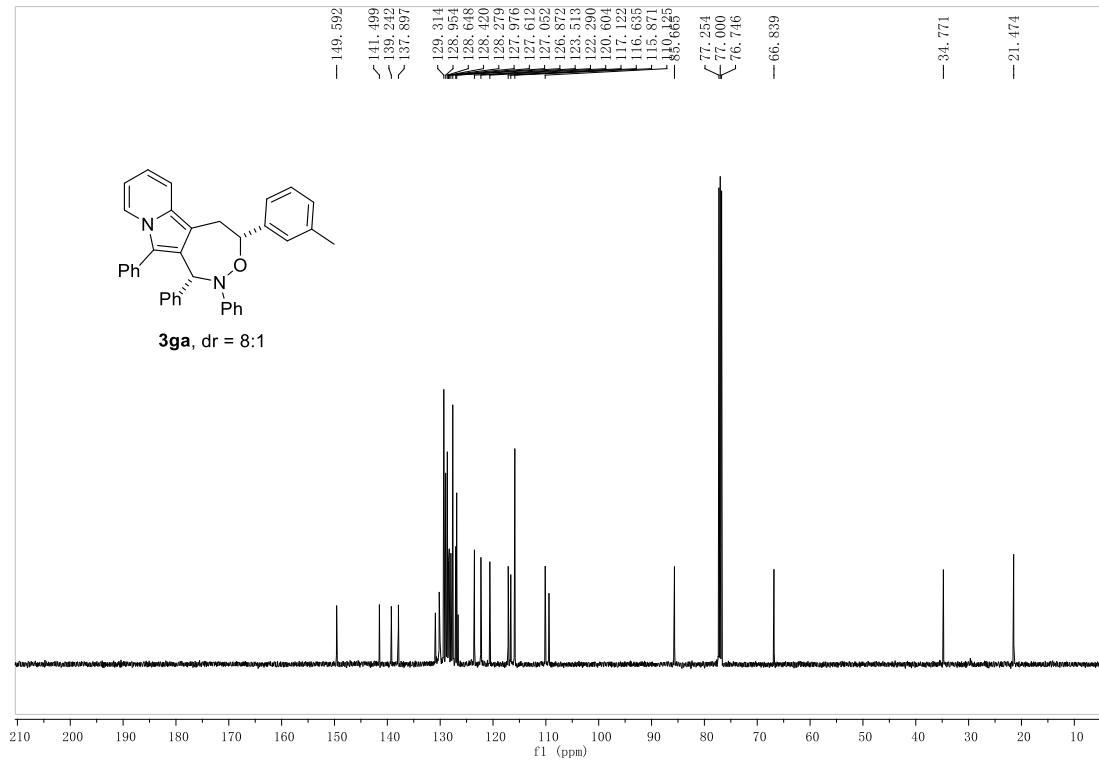

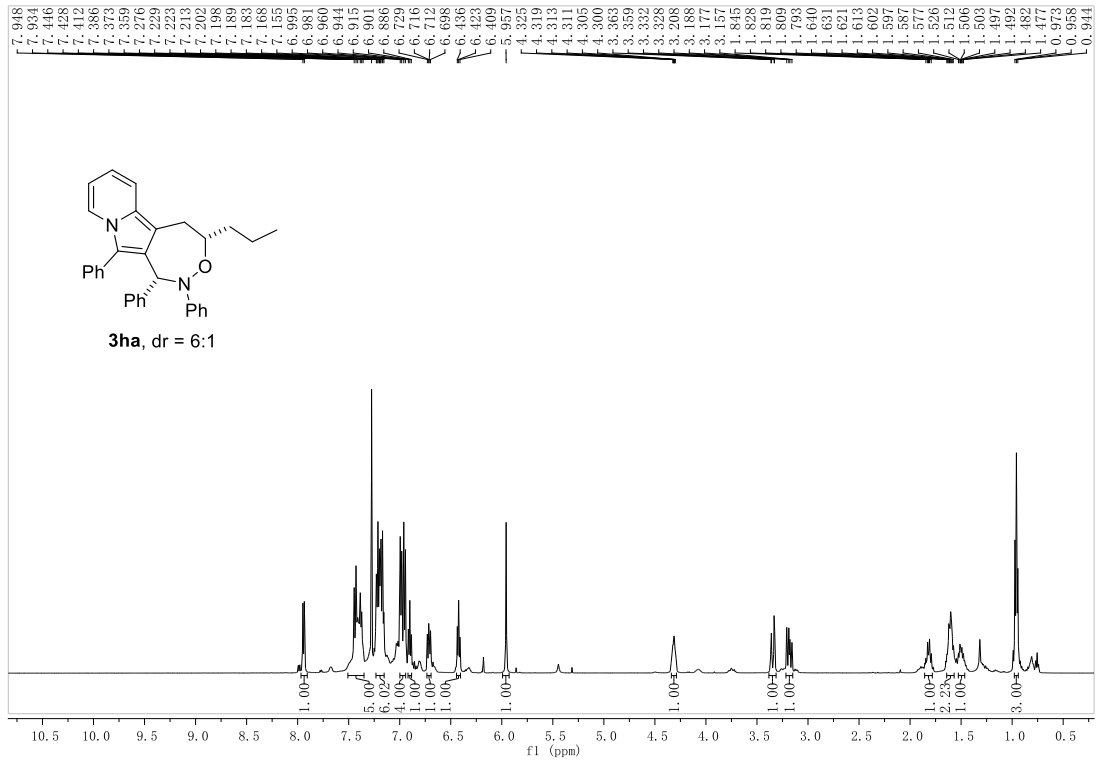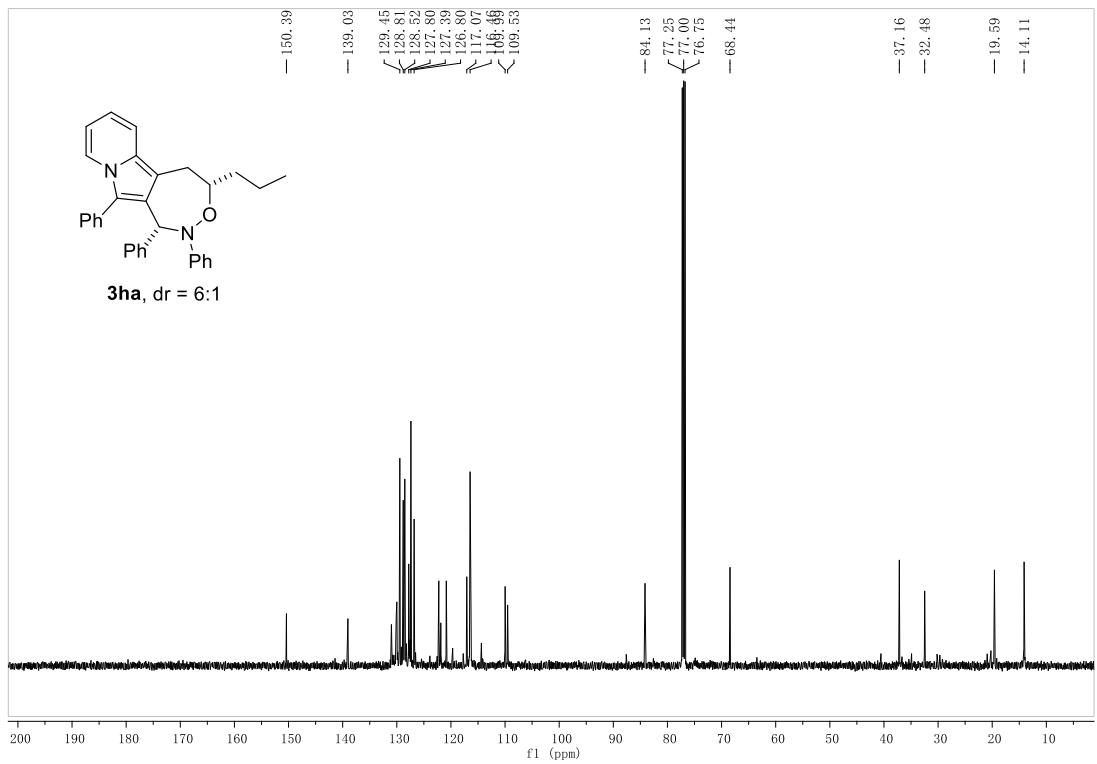



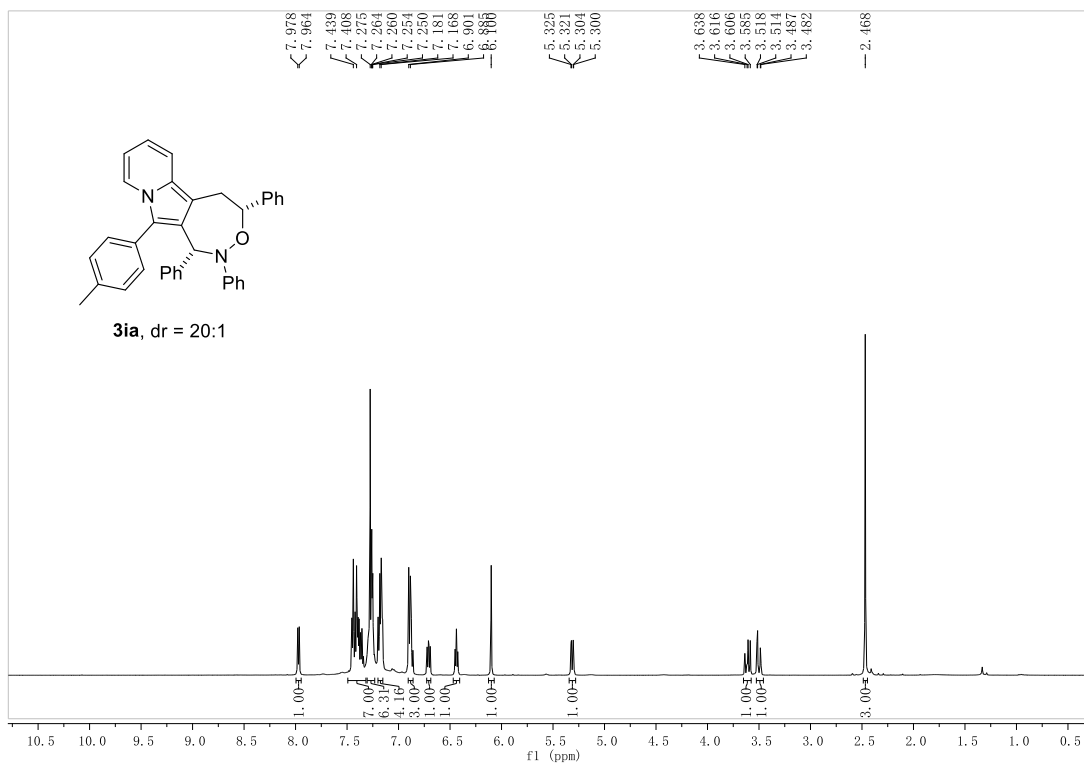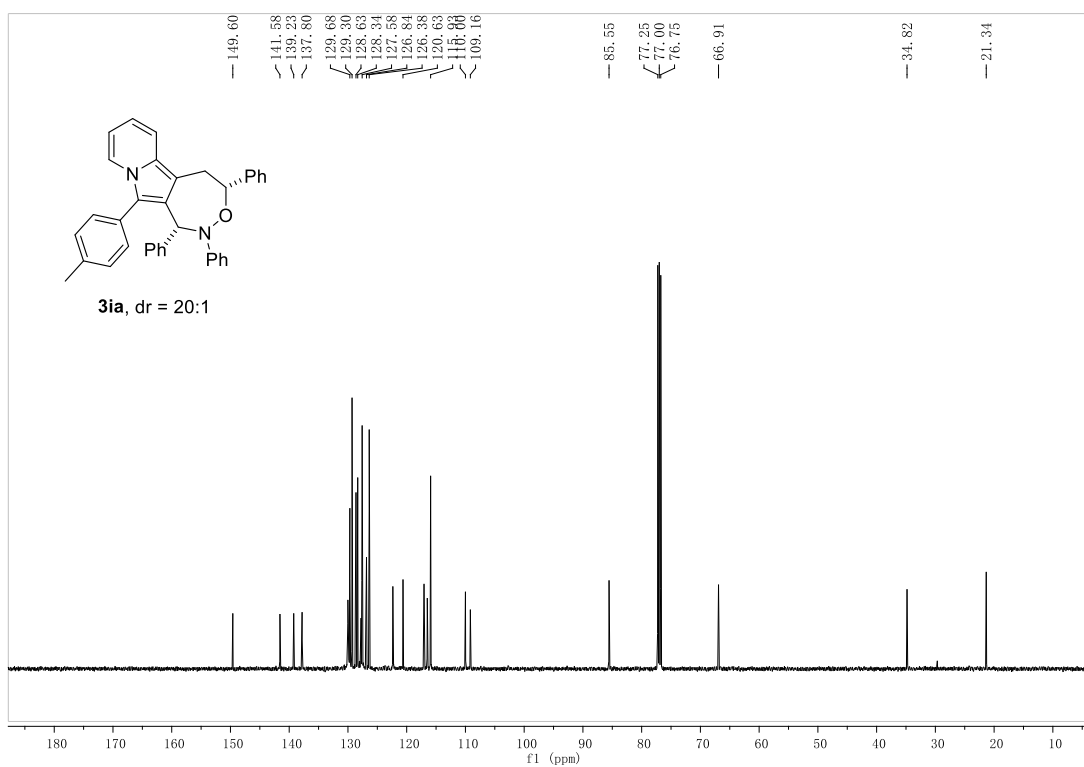

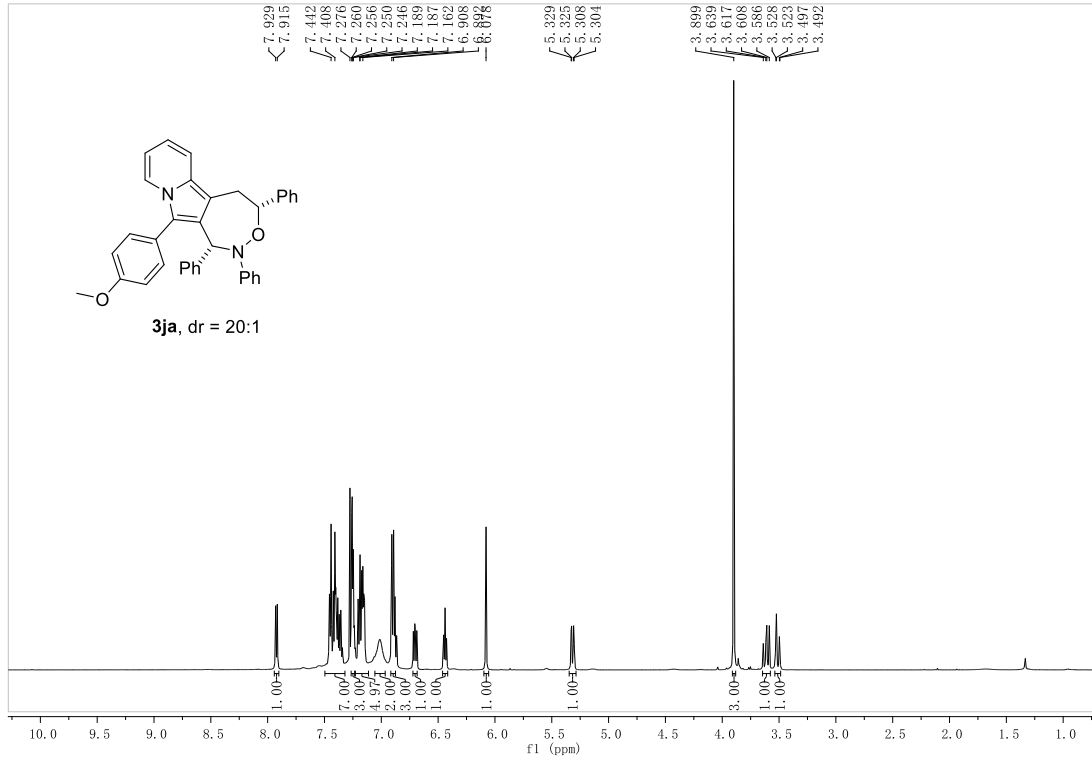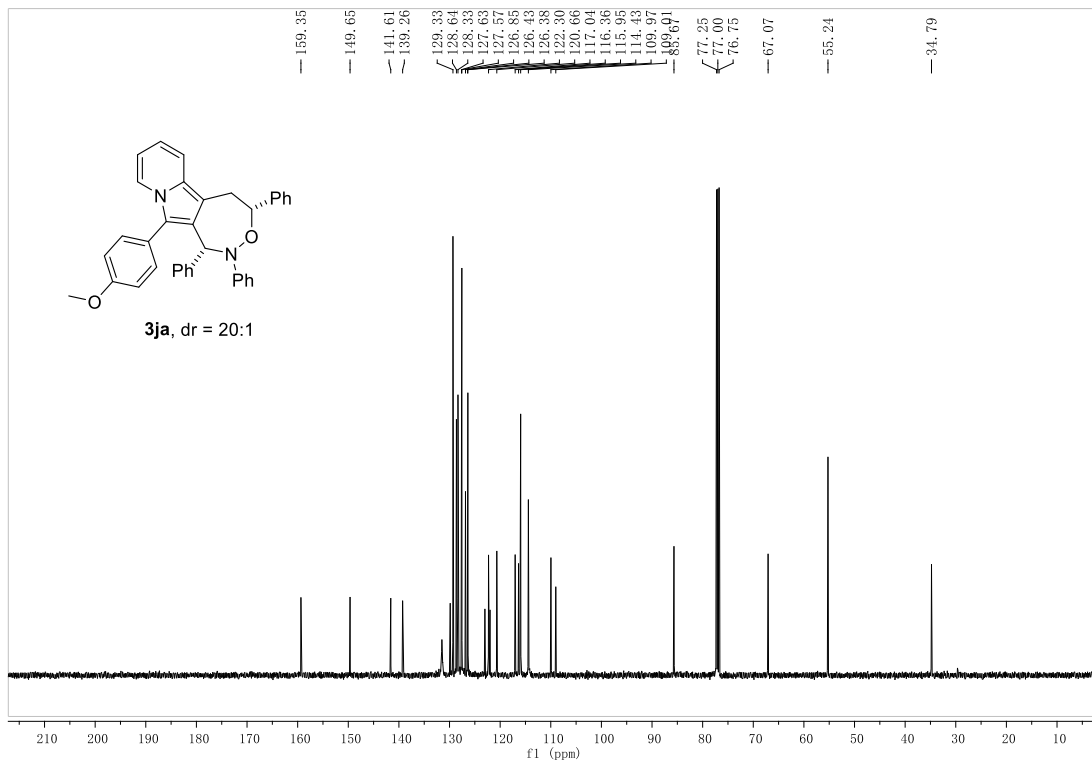

8.37, 8.35, 8.05, 8.03, 7.41, 7.37, 7.34, 7.33, 7.32, 7.27, 7.17, 7.15, 7.04, 6.91, 6.89, 6.88, 6.87, 6.85, 6.83, 6.82, 6.81, 6.80, 6.72, 6.55, 6.53, 6.52, 3.55, 3.53, 3.52

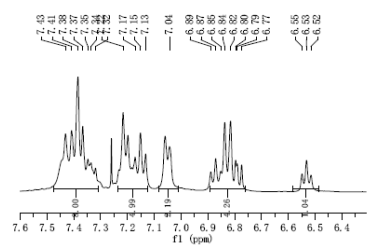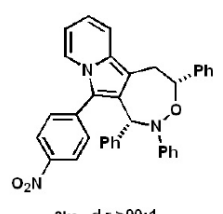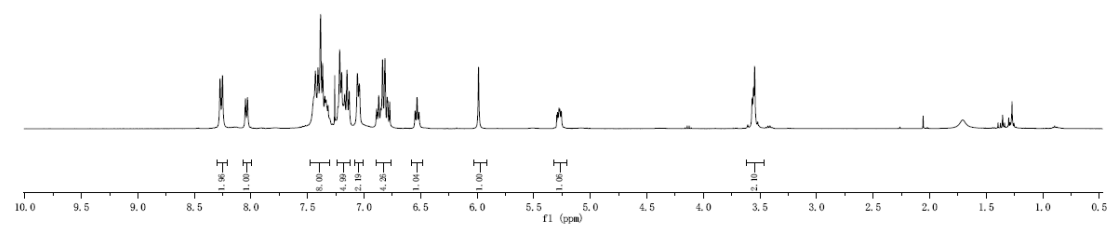

119.52, 116.53, 111.25, 109.72, 109.71, 103.83, 102.73, 102.68, 102.67, 102.66, 102.65, 102.64, 102.63, 102.62, 102.61, 102.60, 102.59, 102.58, 102.57, 102.56, 102.55, 102.54, 102.53, 102.52, 102.51, 102.50, 102.49, 102.48, 102.47, 102.46, 102.45, 102.44, 102.43, 102.42, 102.41, 102.40, 102.39, 102.38, 102.37, 102.36, 102.35, 102.34, 102.33, 102.32, 102.31, 102.30, 102.29, 102.28, 102.27, 102.26, 102.25, 102.24, 102.23, 102.22, 102.21, 102.20, 102.19, 102.18, 102.17, 102.16, 102.15, 102.14, 102.13, 102.12, 102.11, 102.10, 102.09, 102.08, 102.07, 102.06, 102.05, 102.04, 102.03, 102.02, 102.01, 102.00, 98.57, 77.32, 77.00, 76.68, 68.14, 31.55

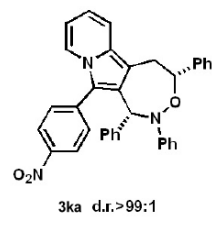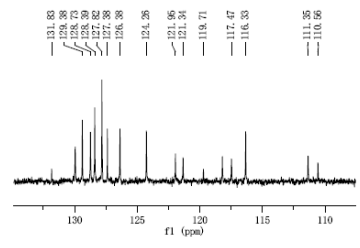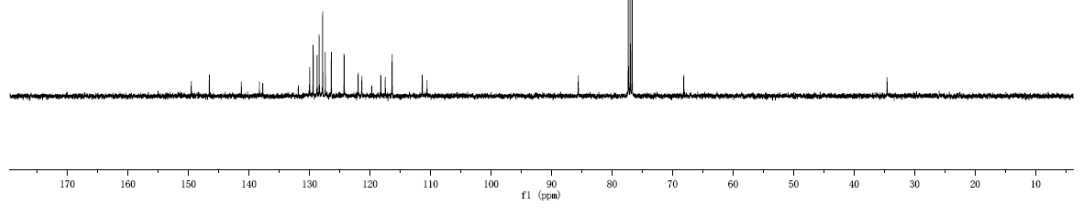

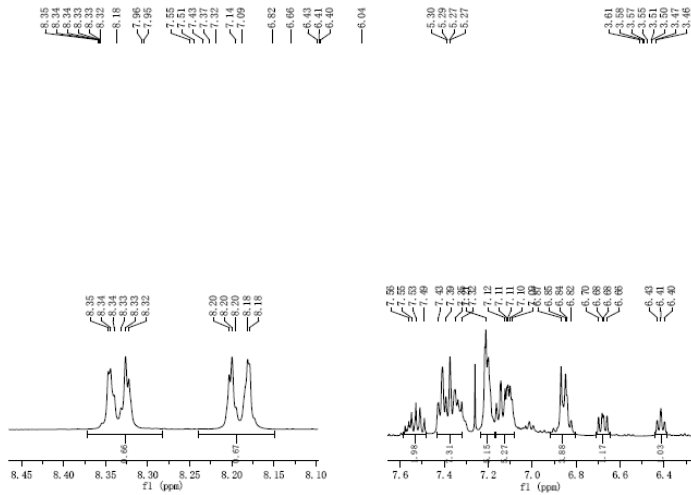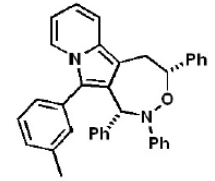

3a d.r.=17:1

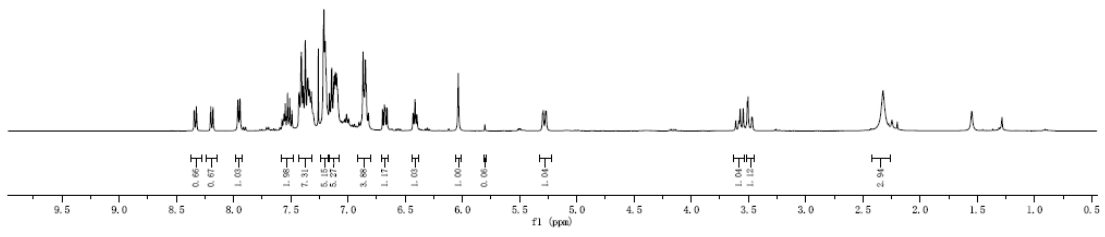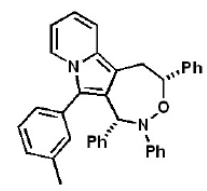

3a d.r.=17:1

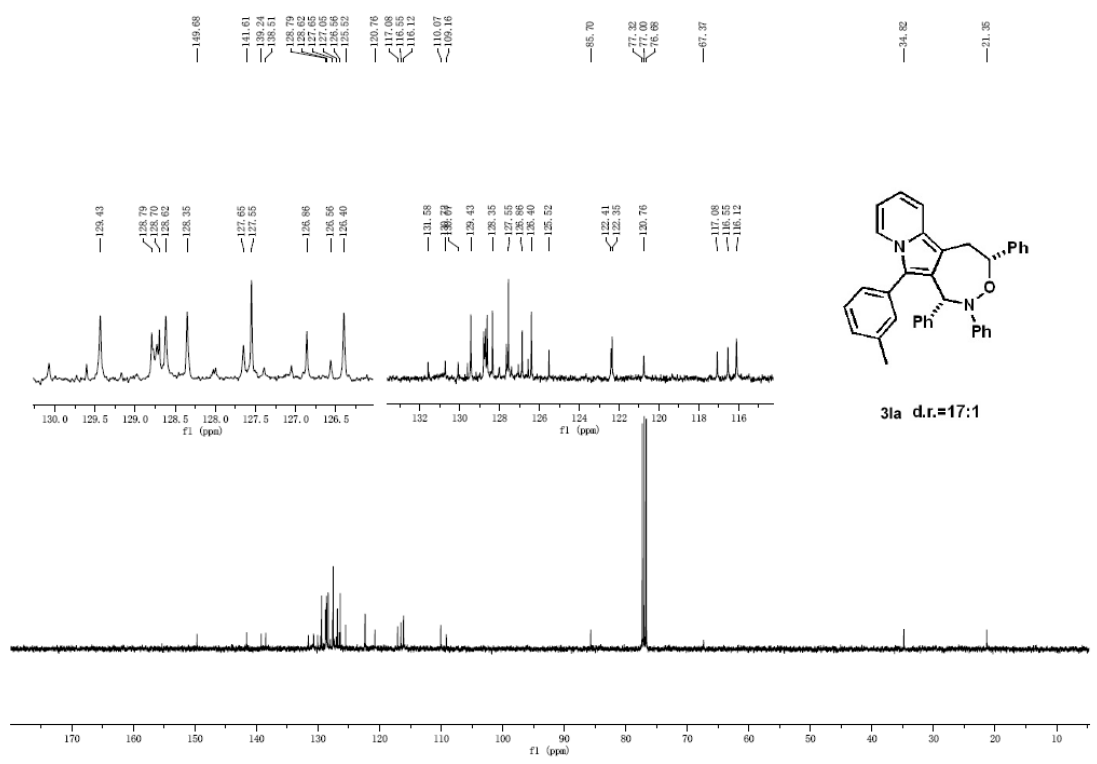

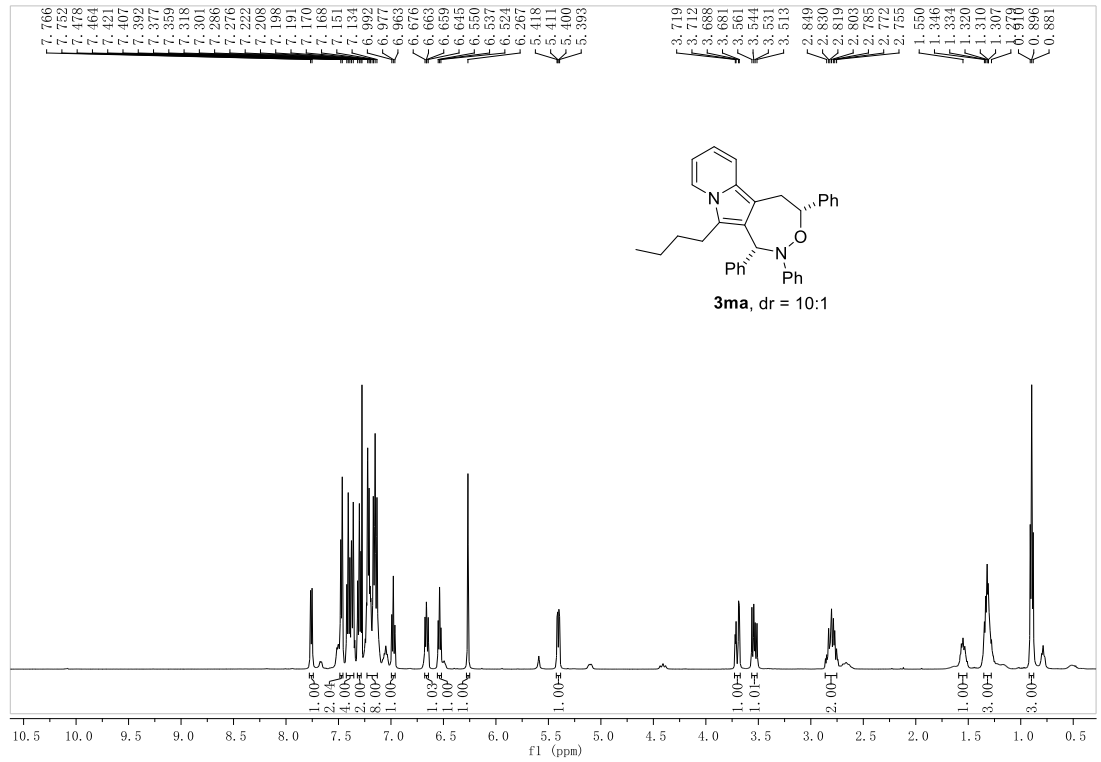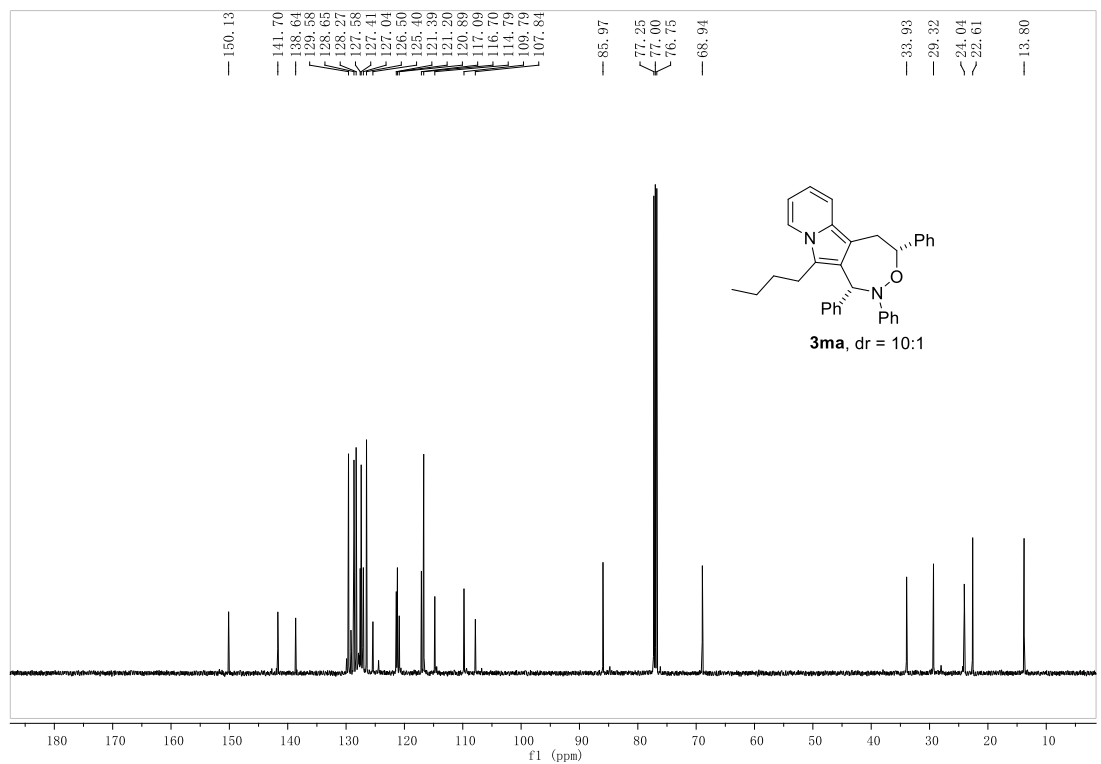

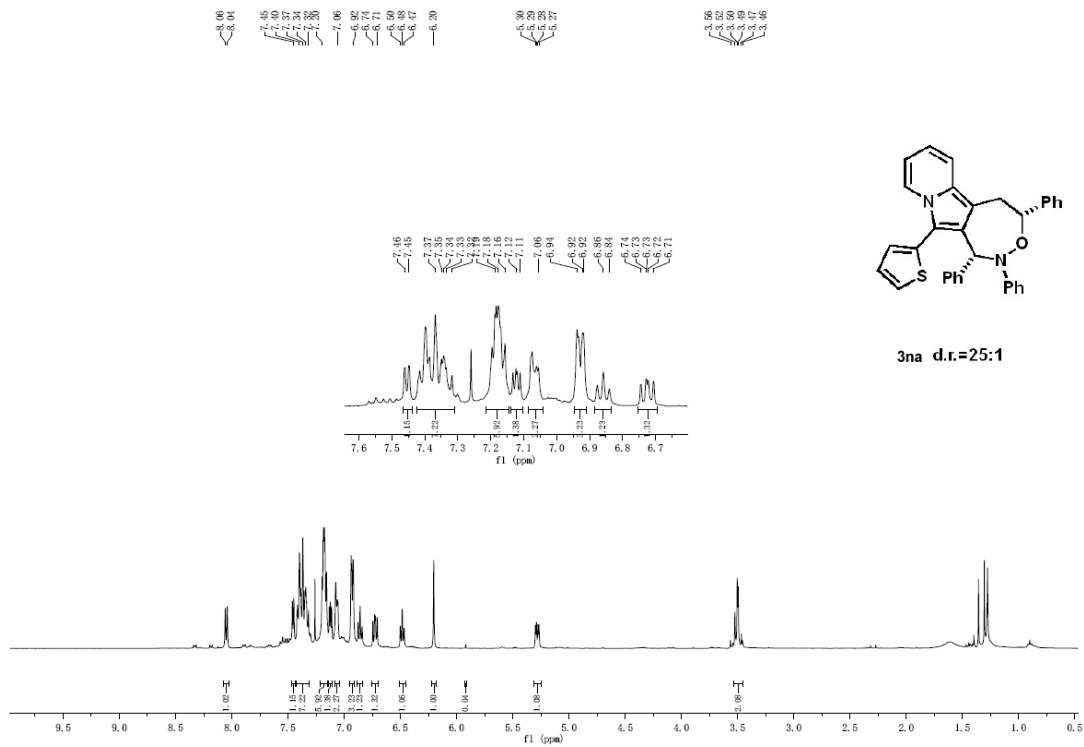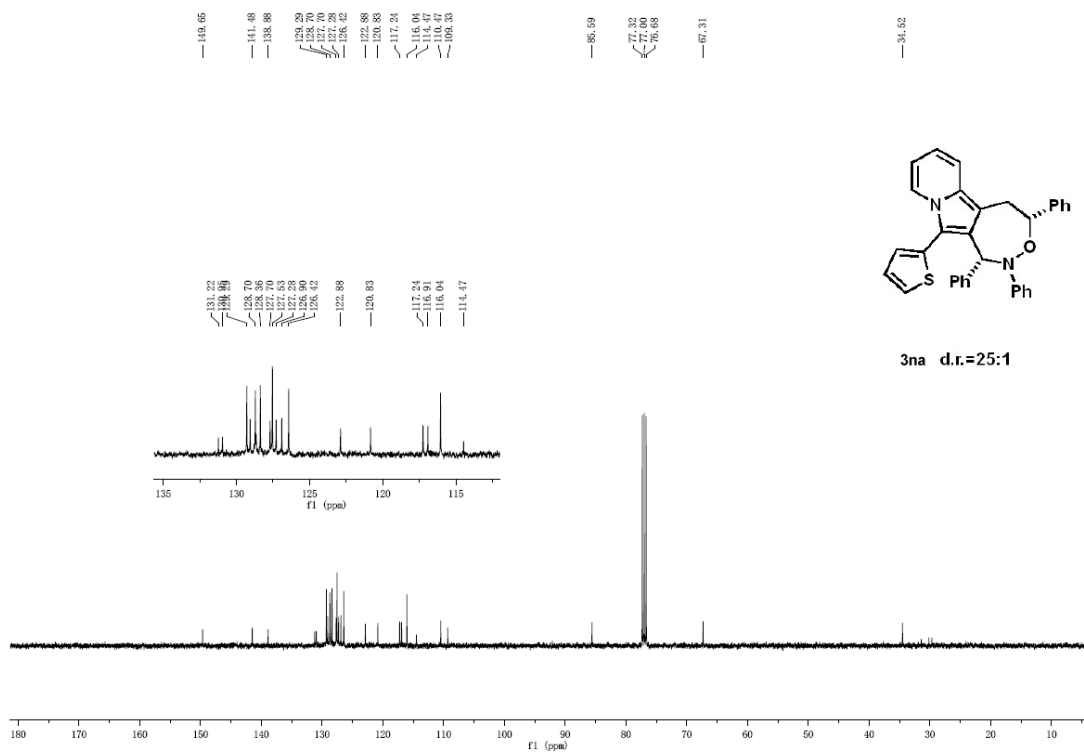

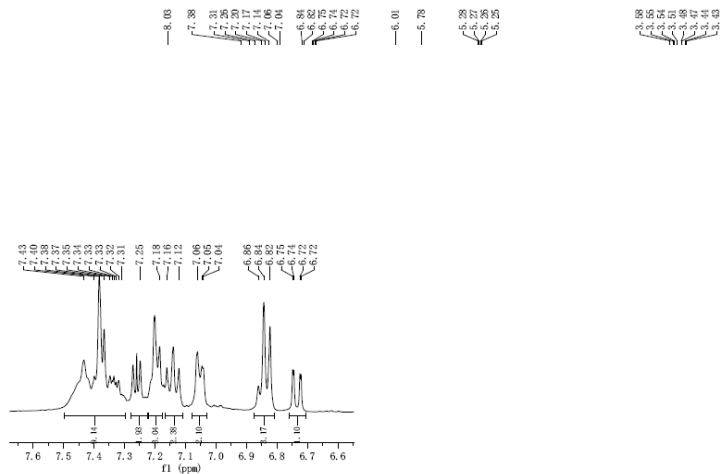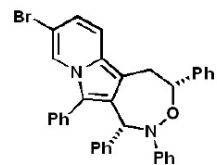

**3pa d.r.=50:1**

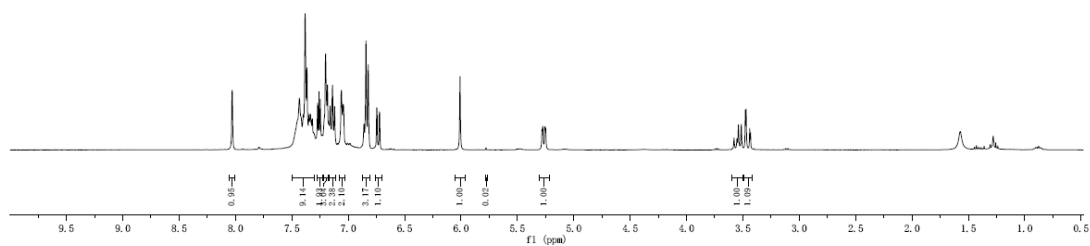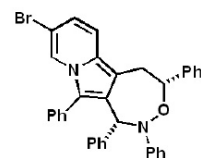

**3pa d.r.=50:1**

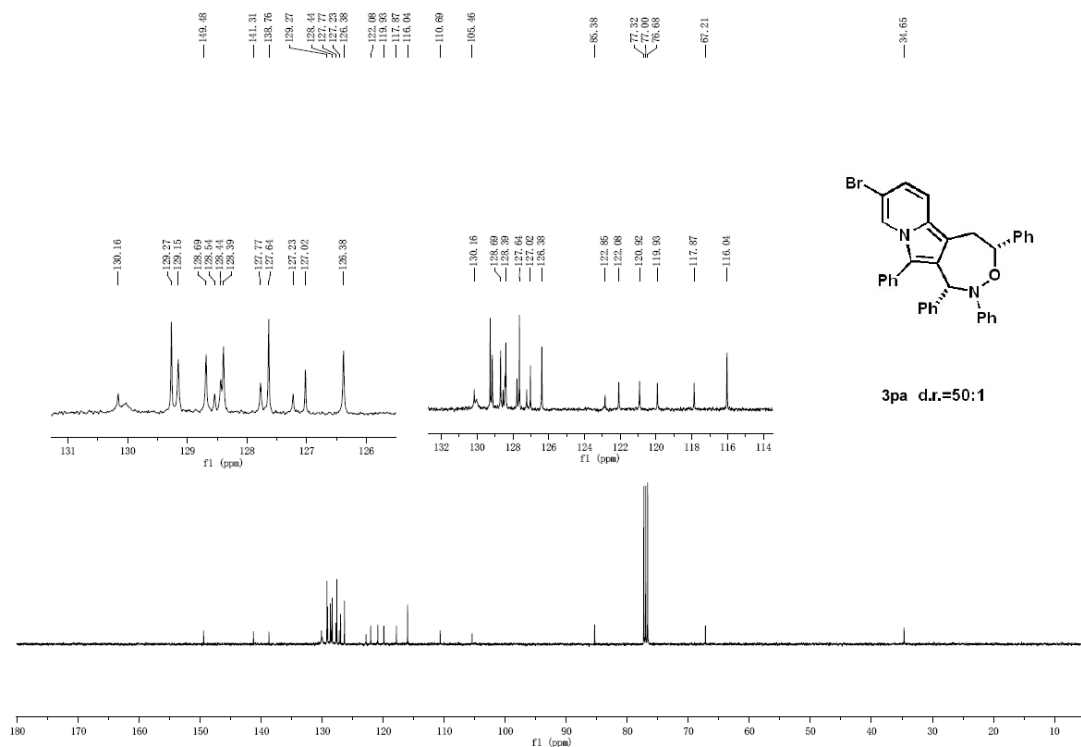

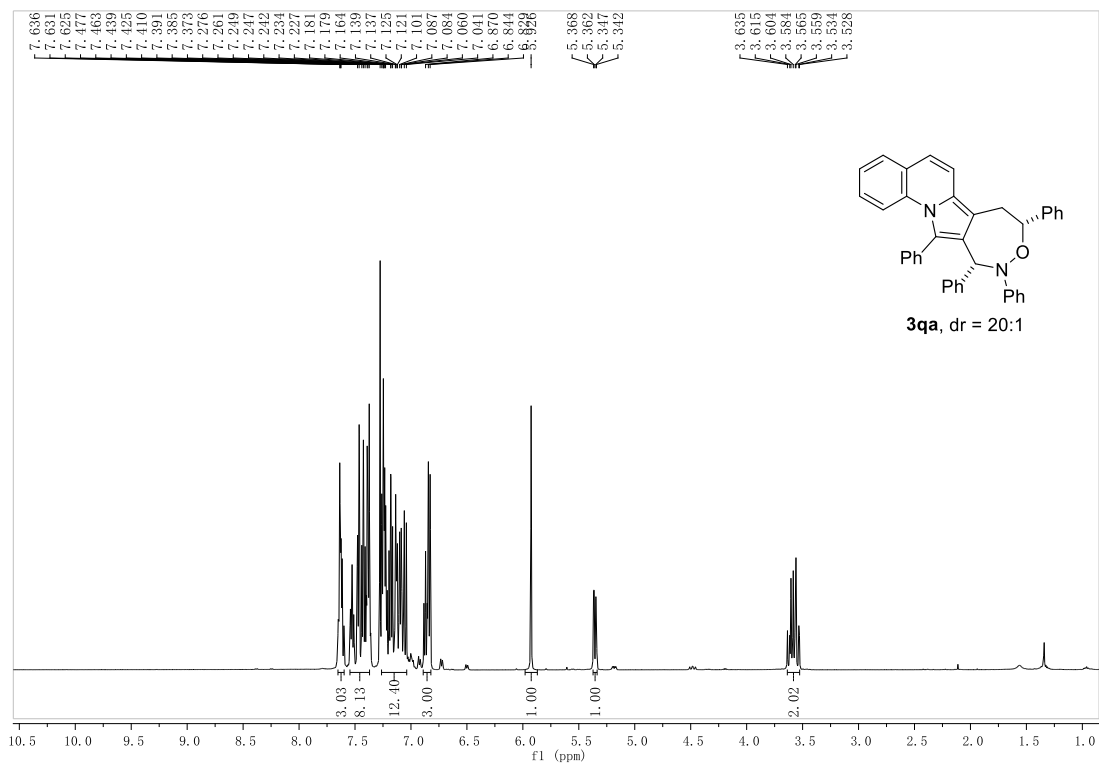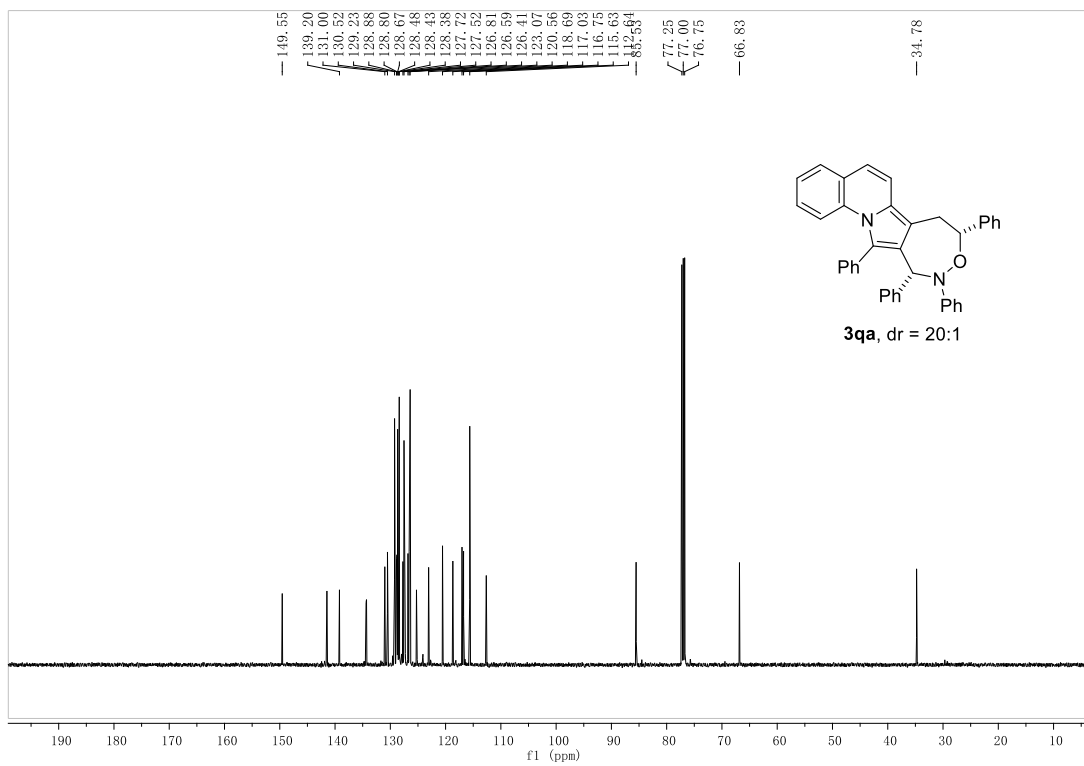



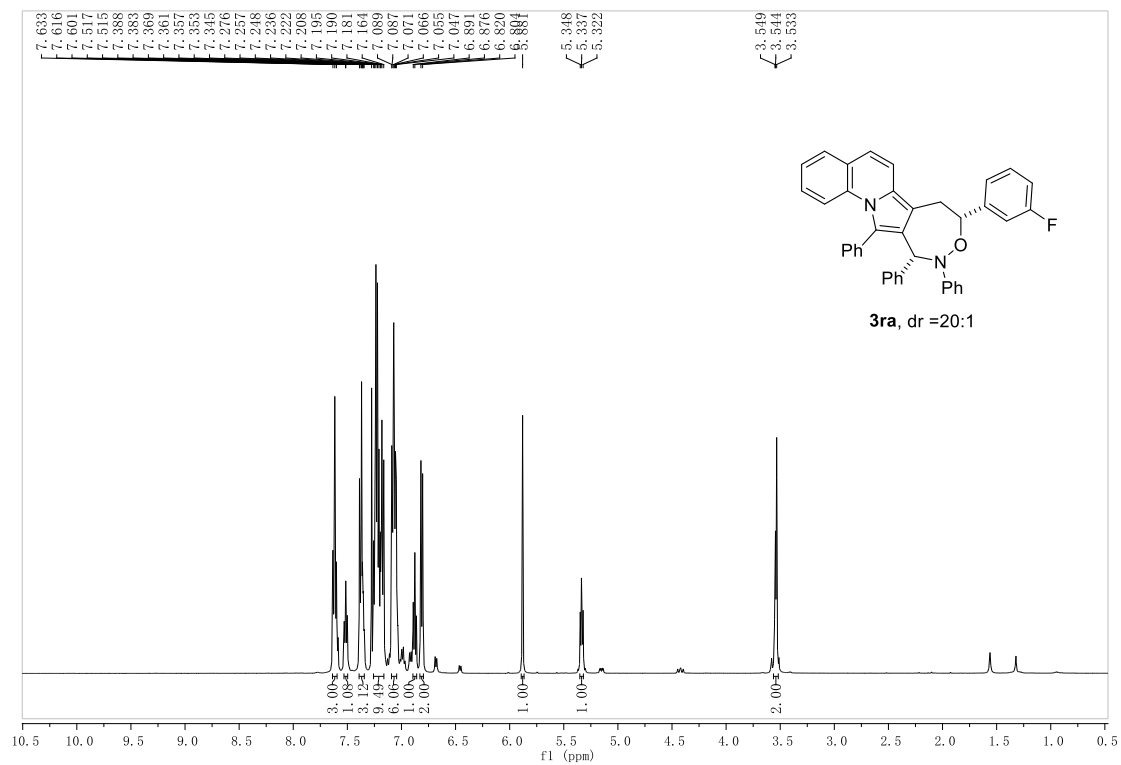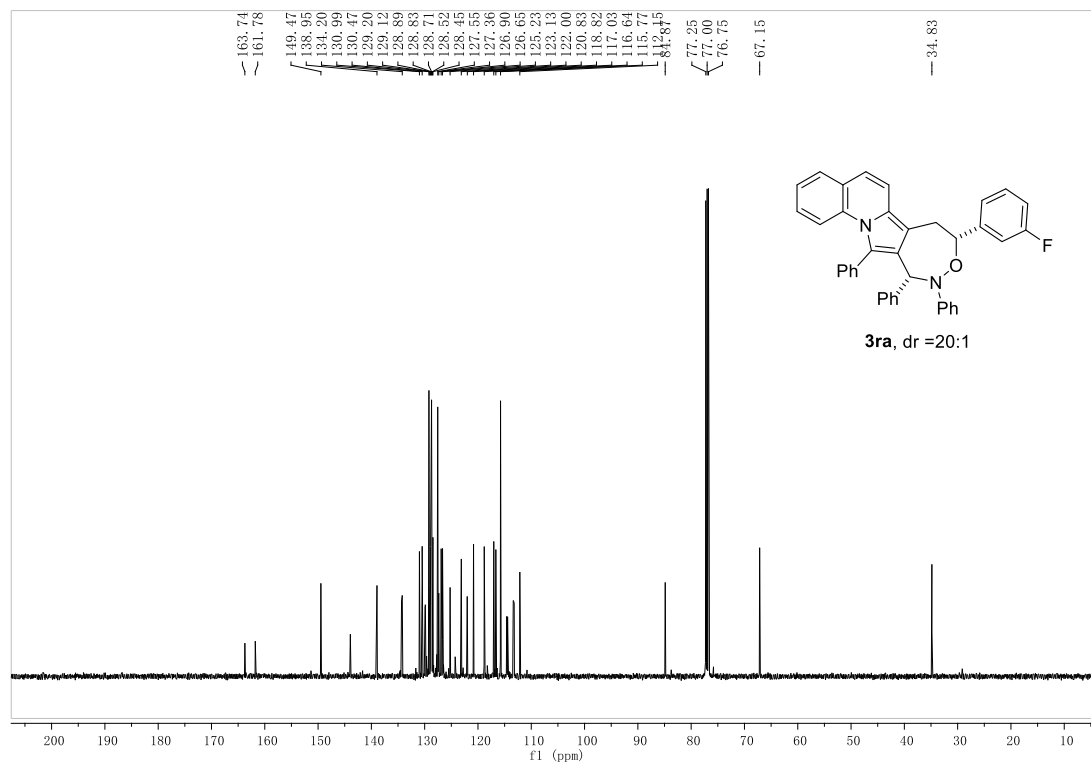

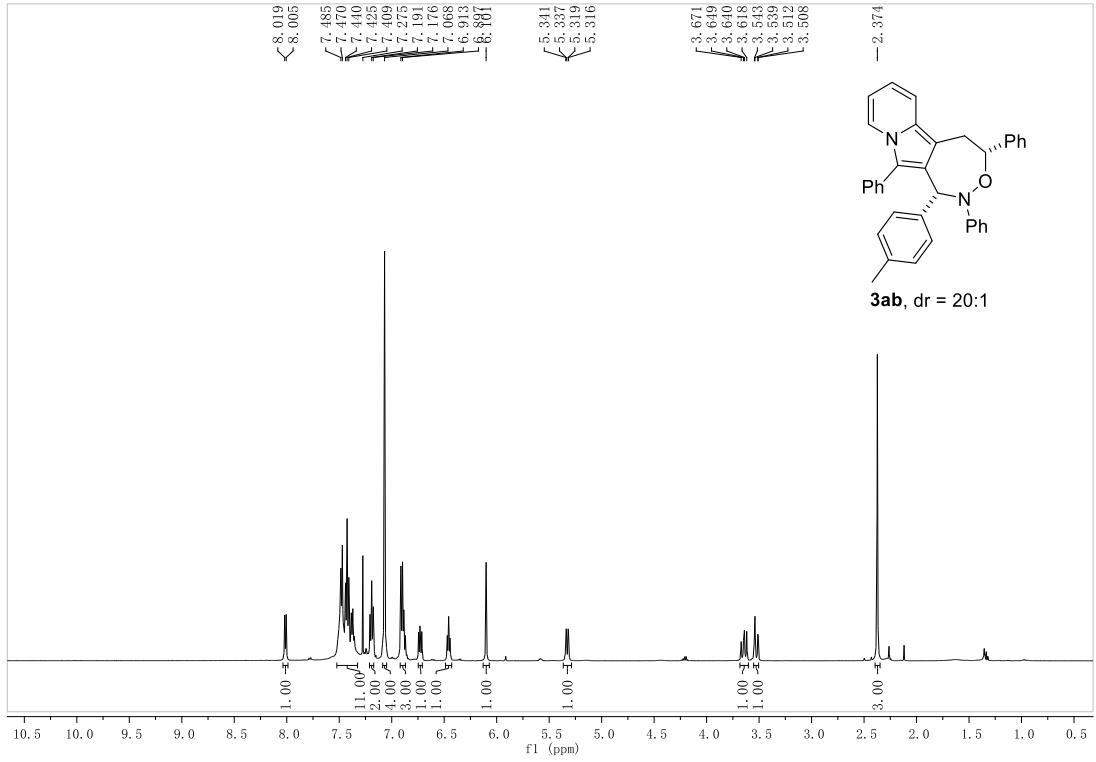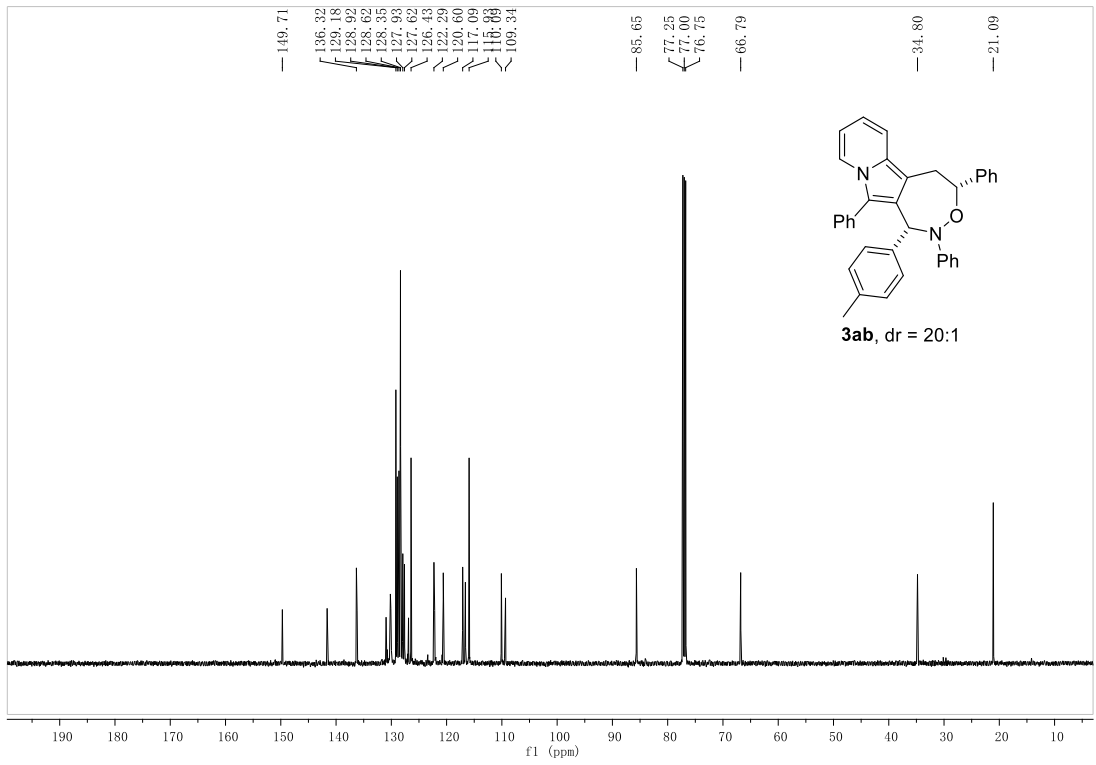

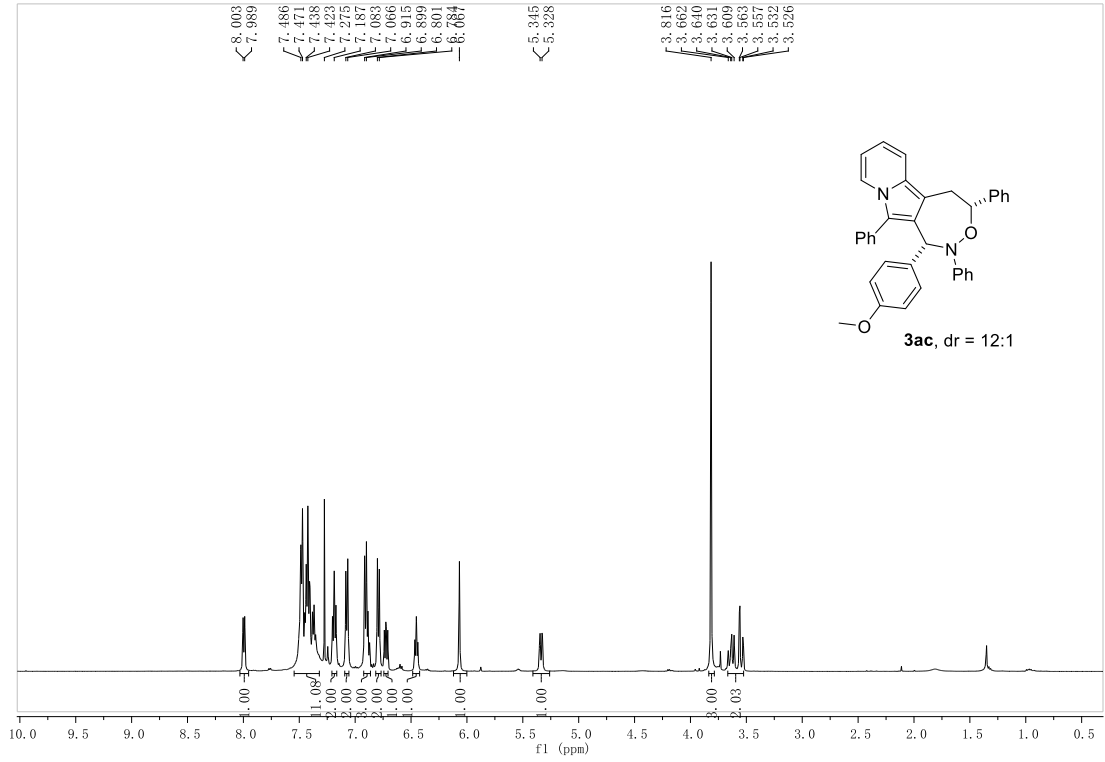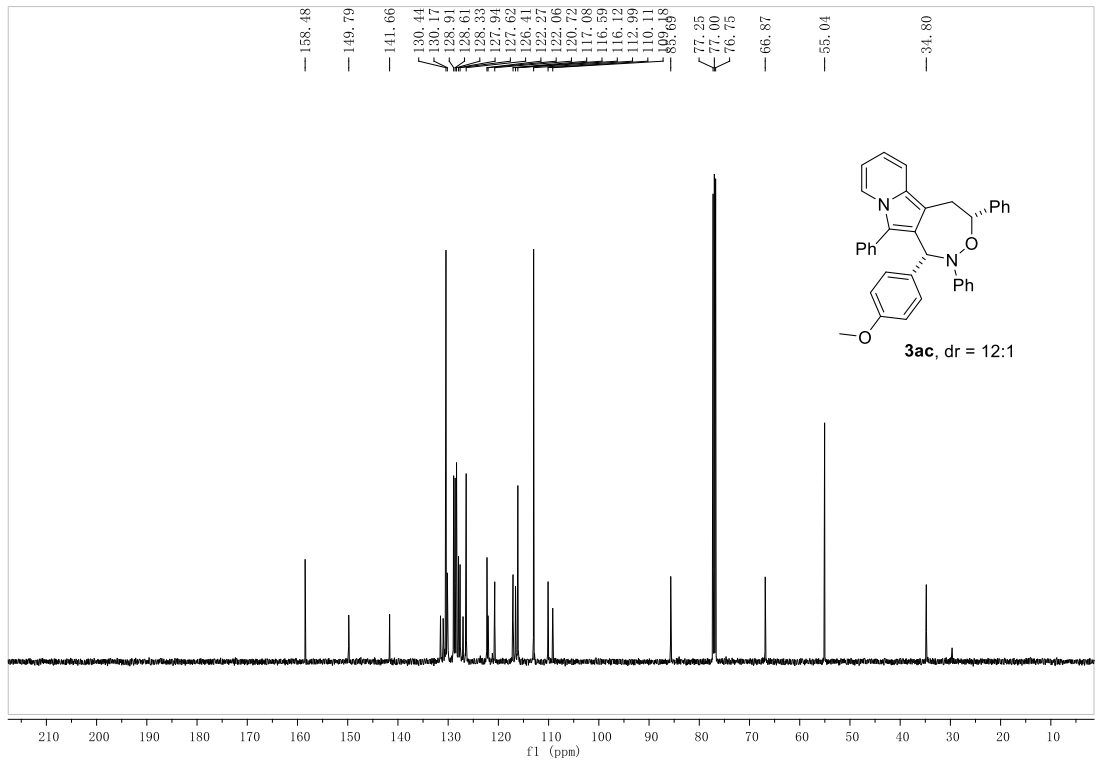

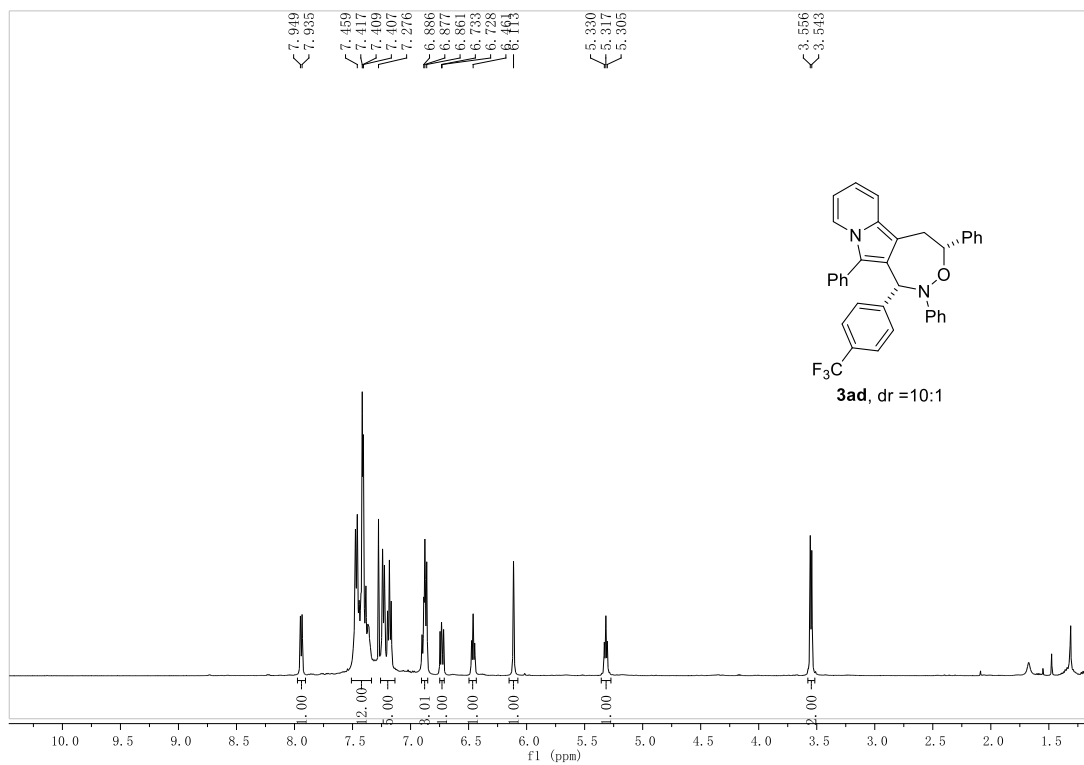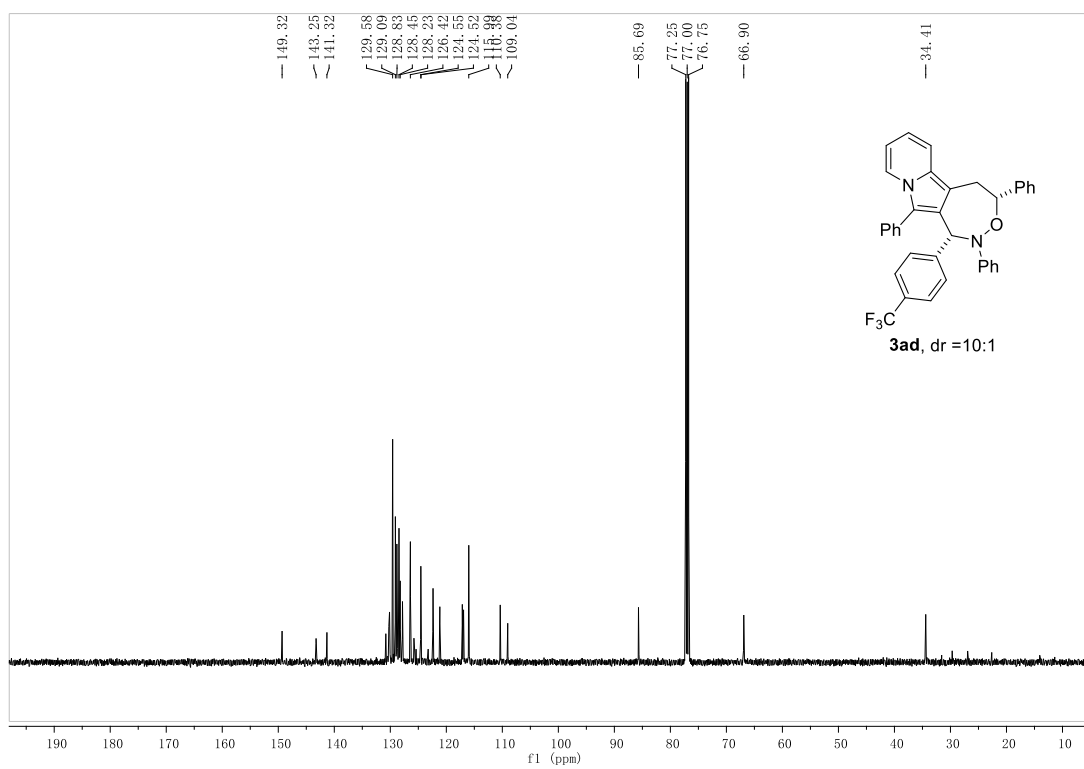

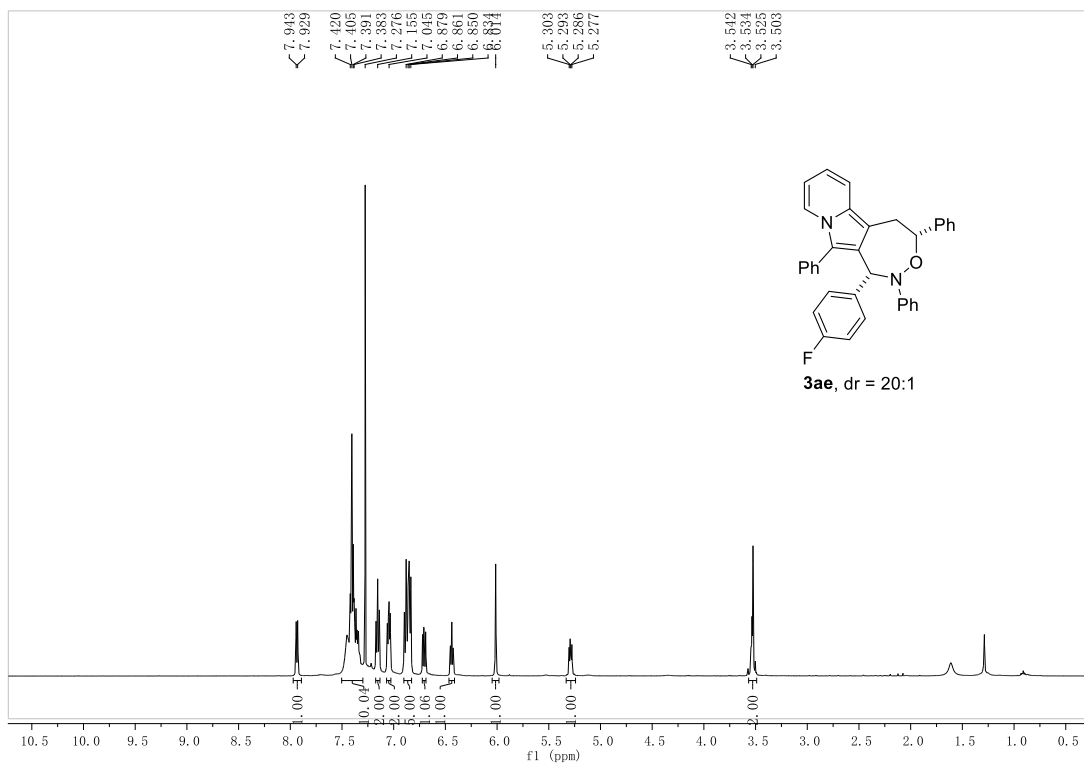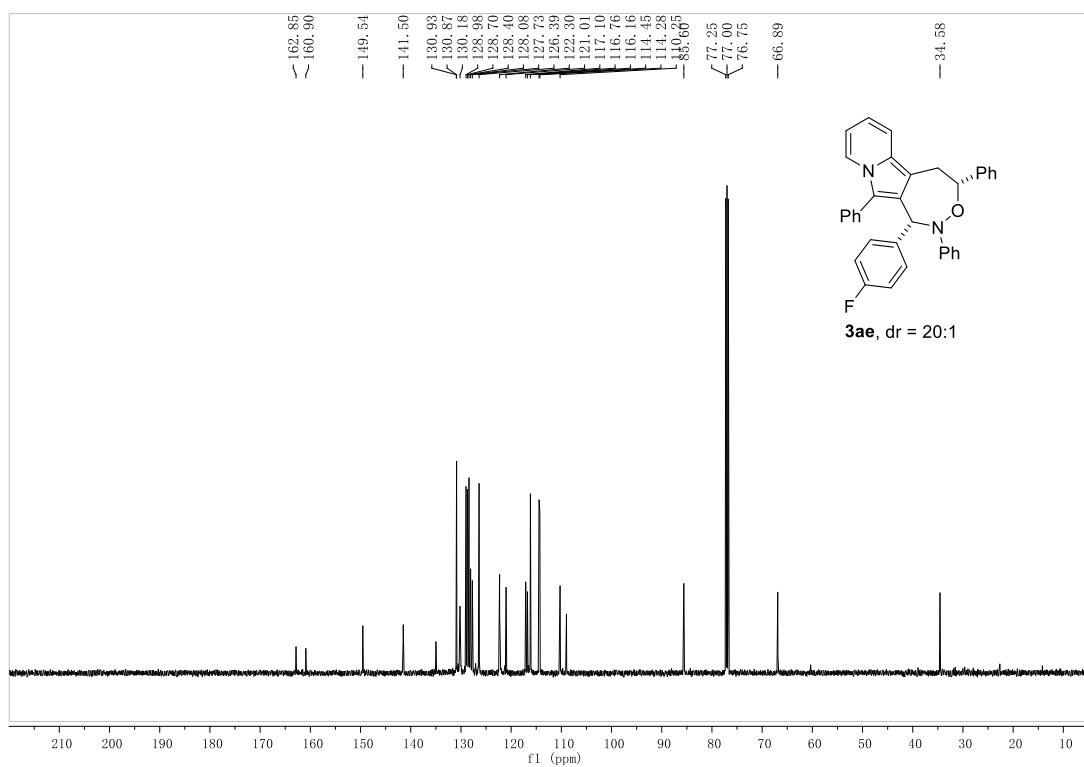

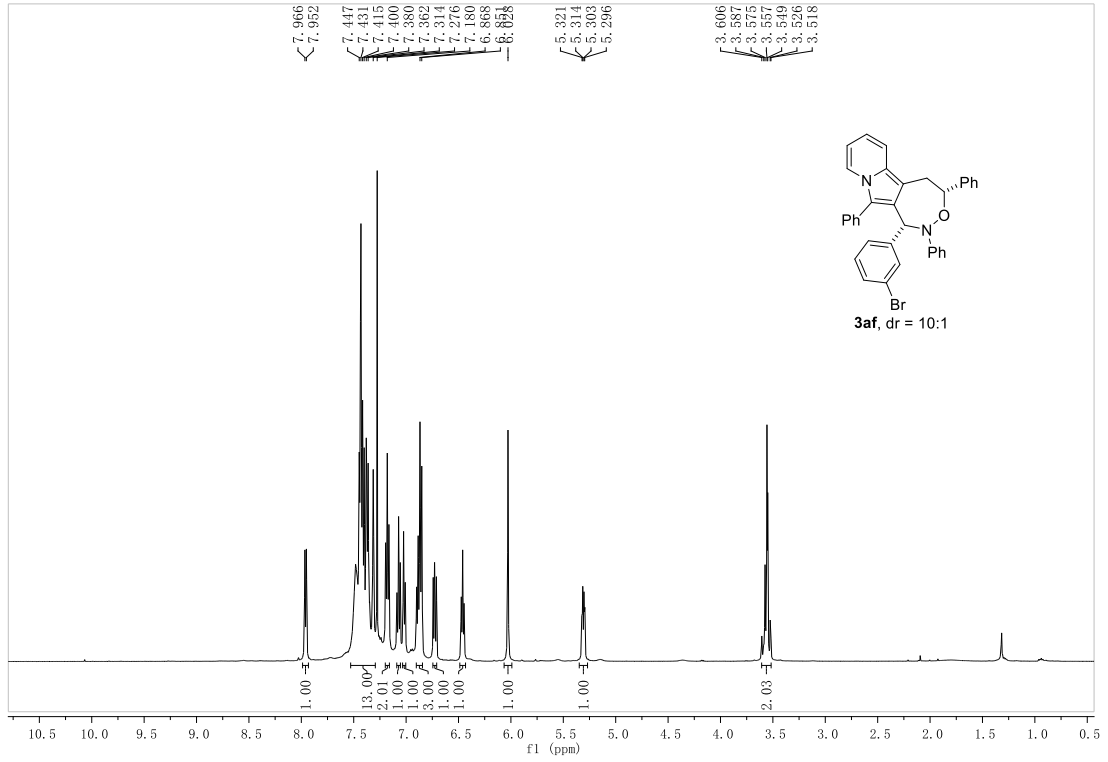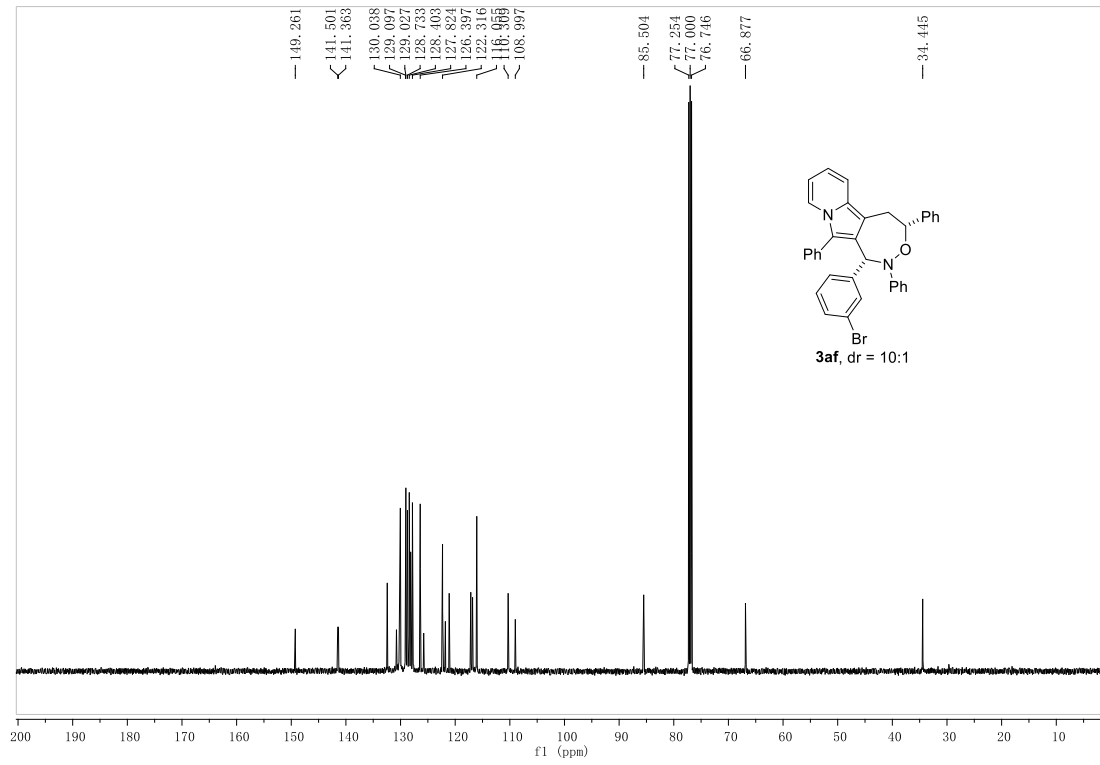

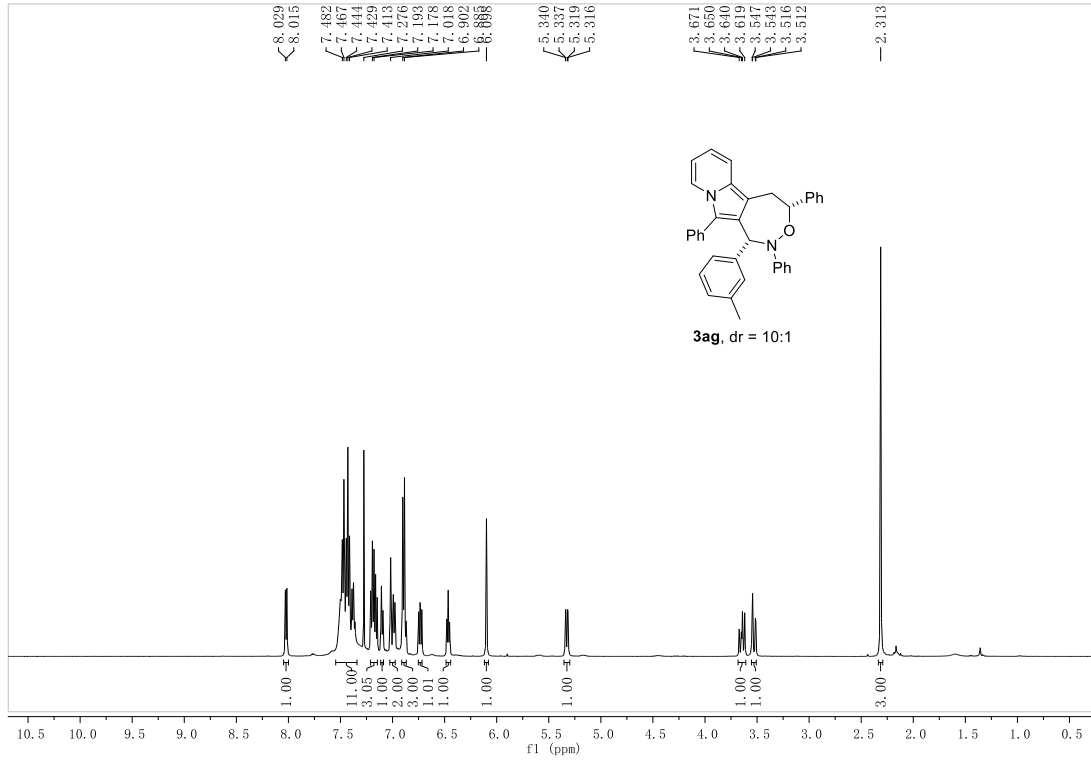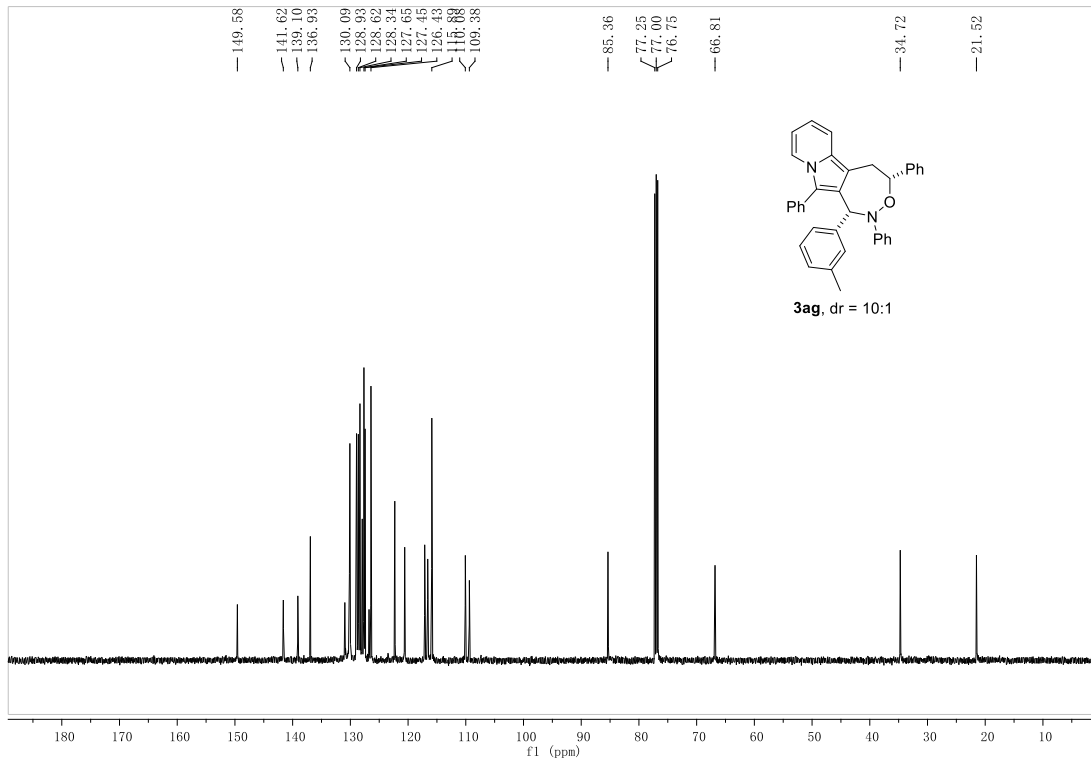

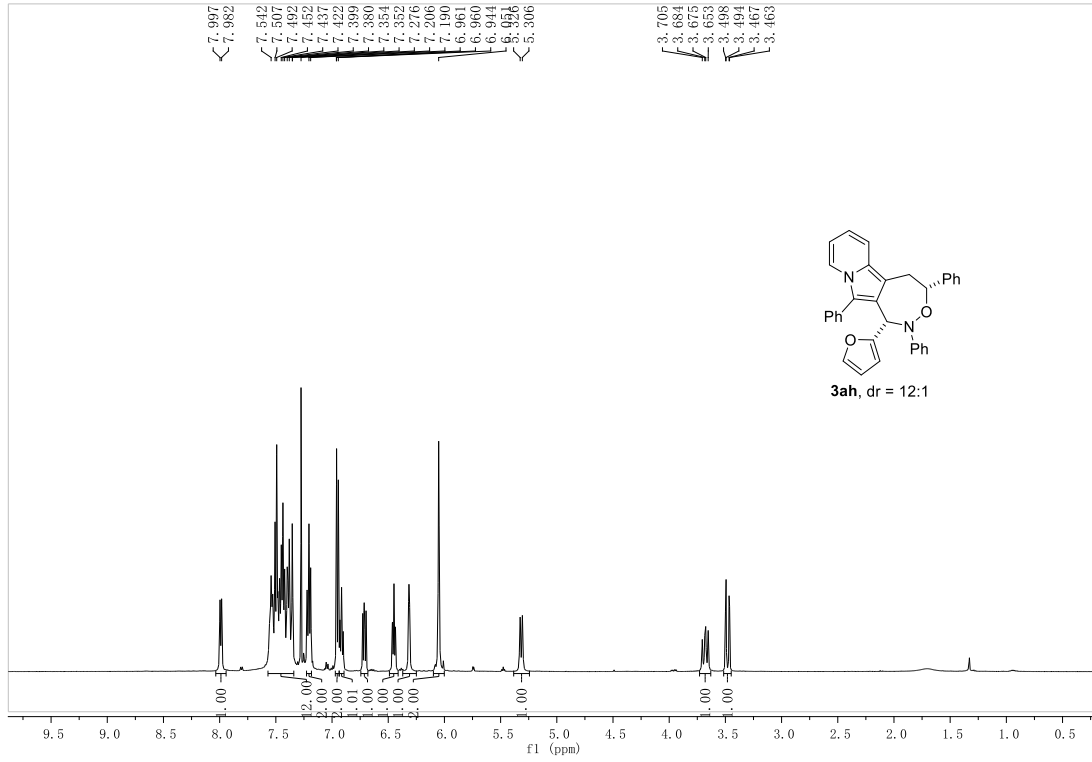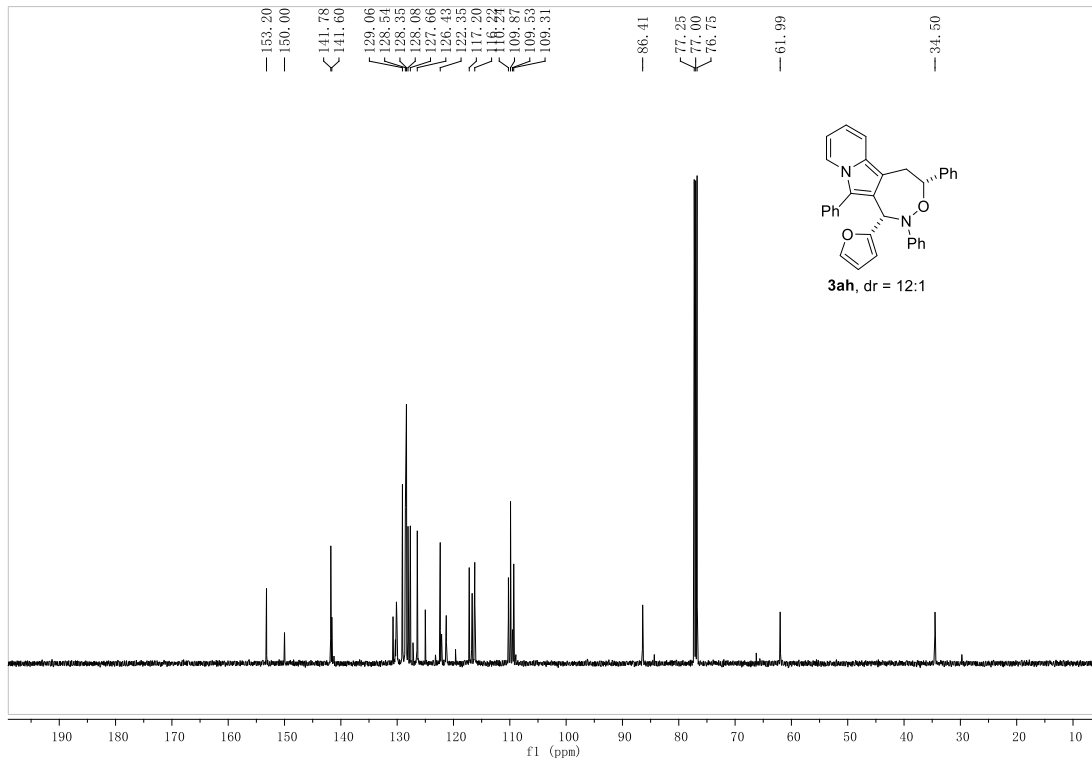



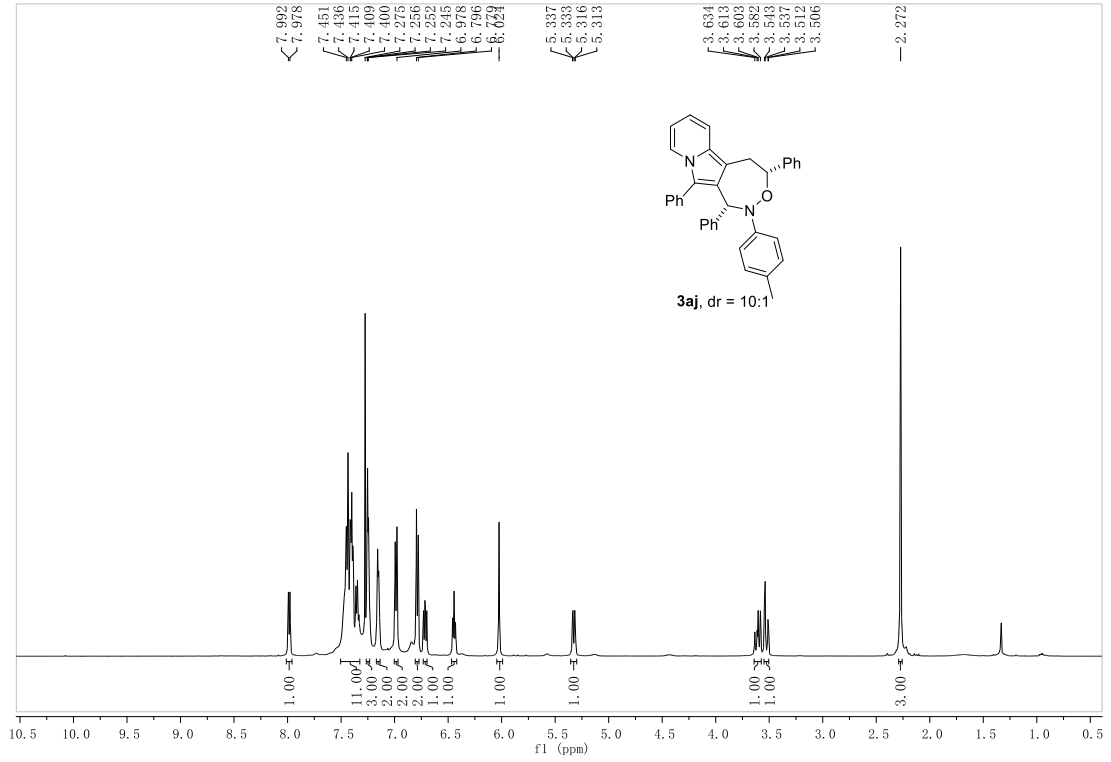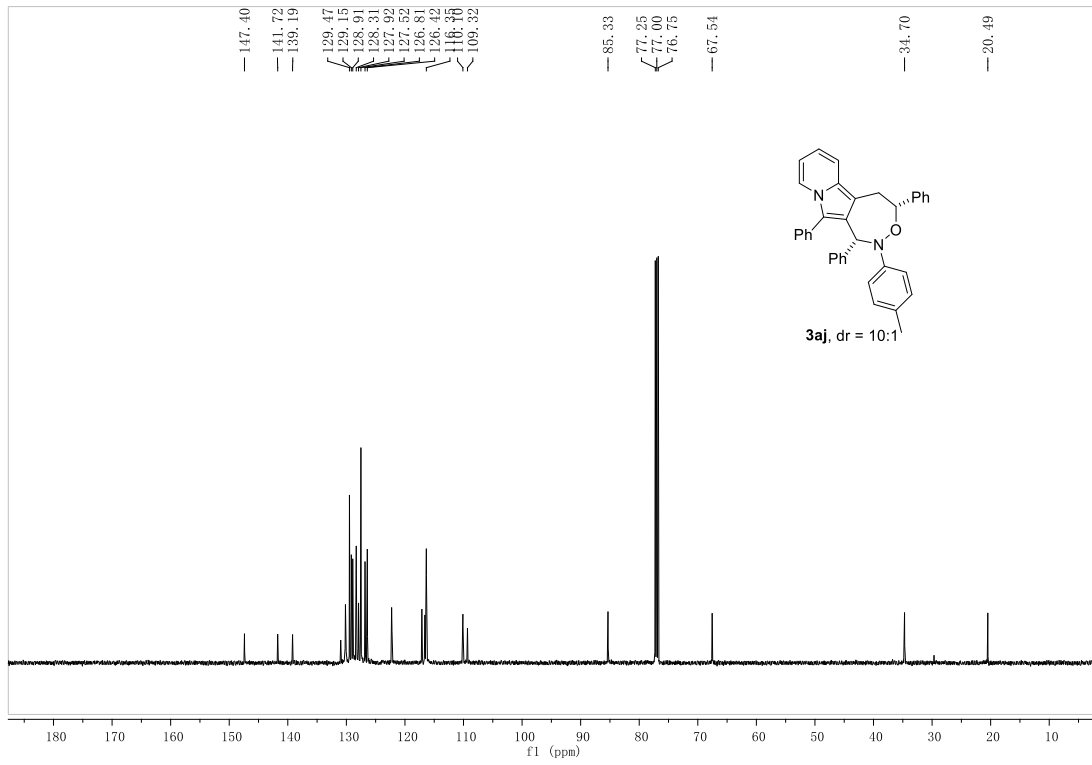

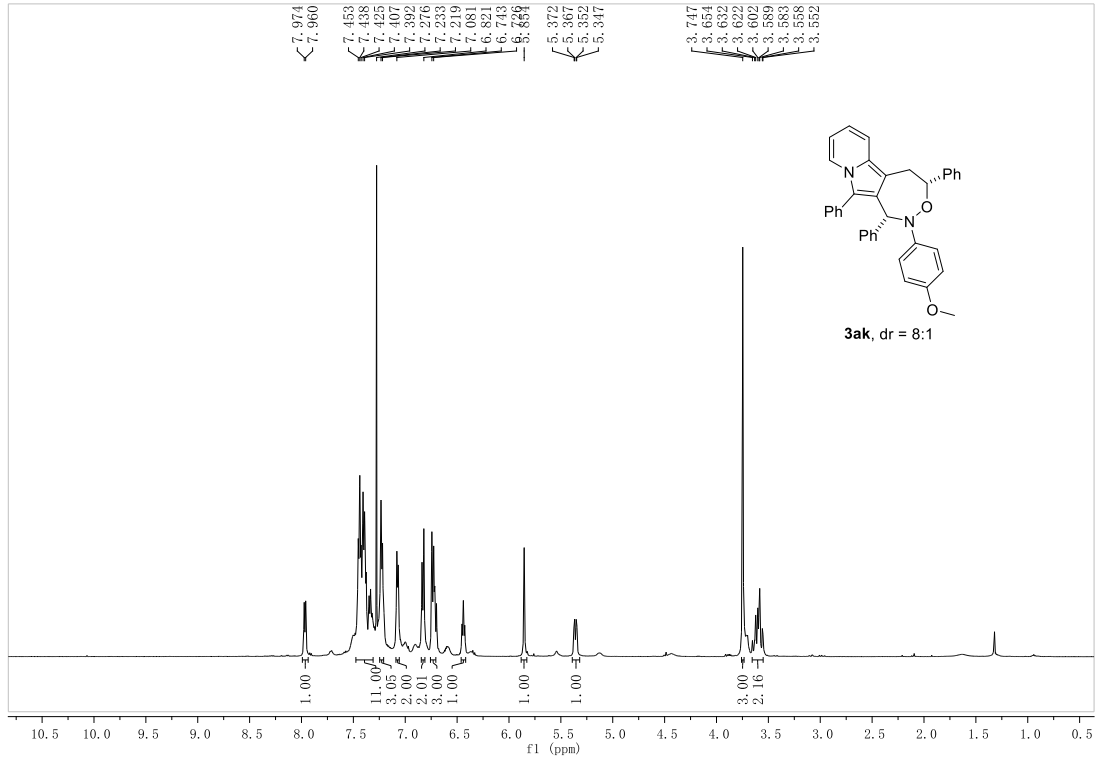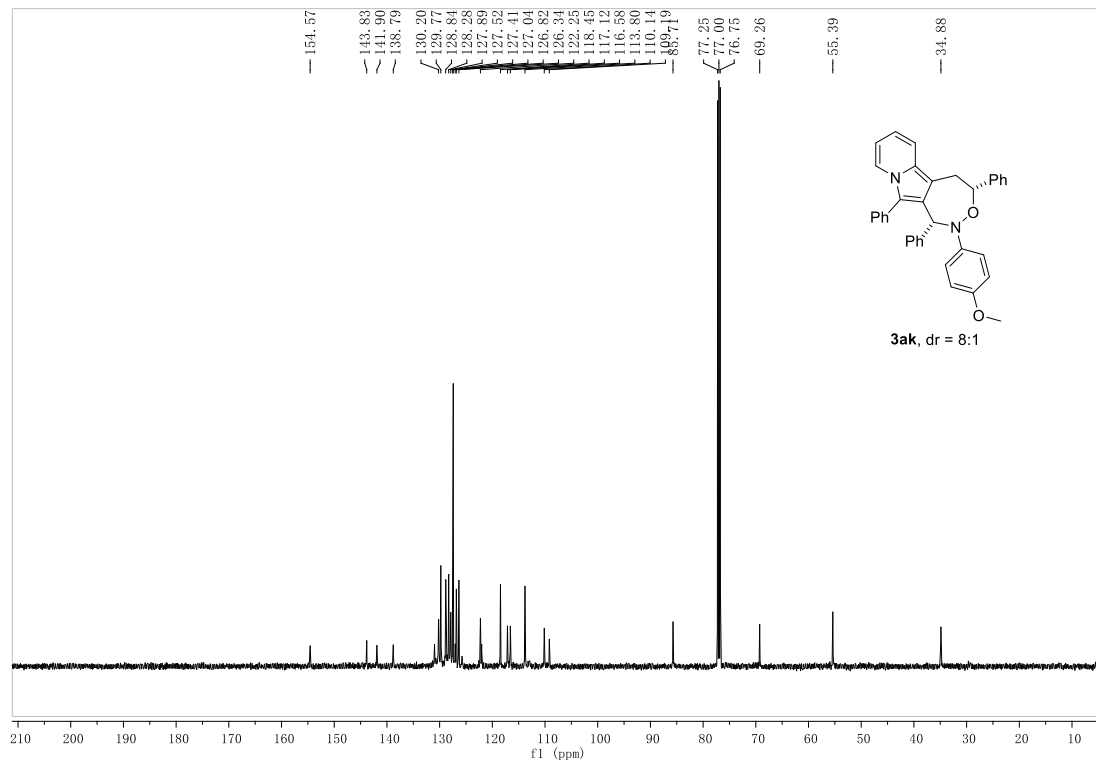

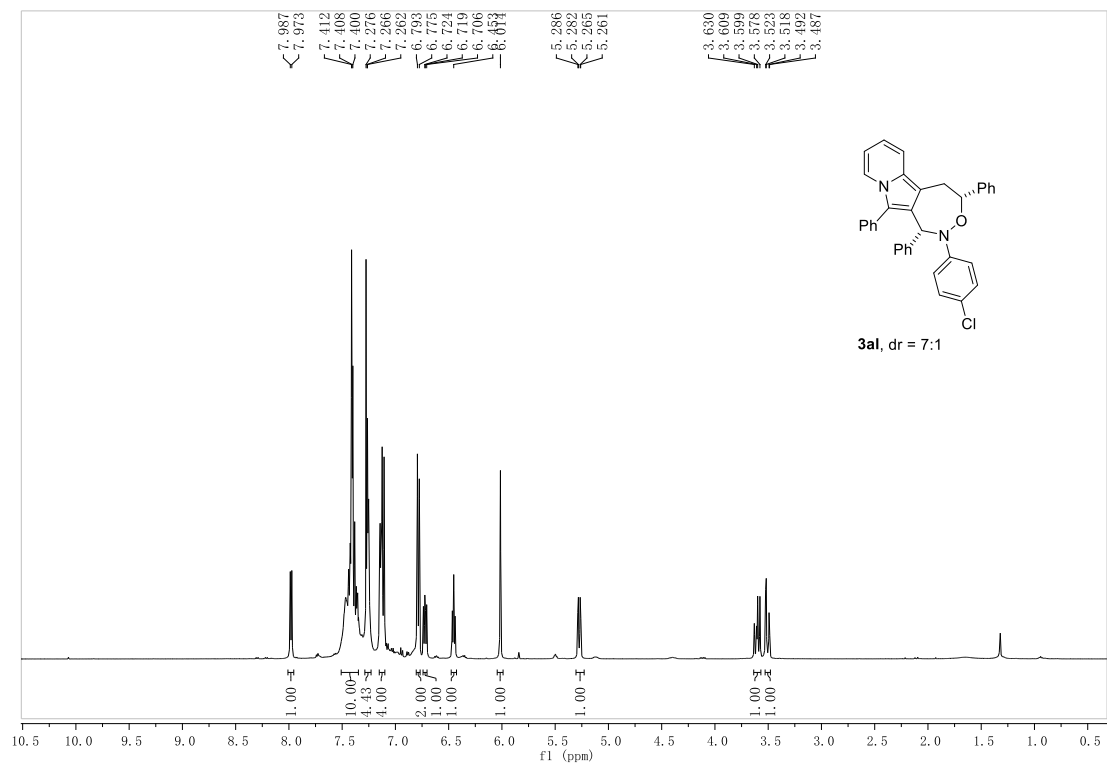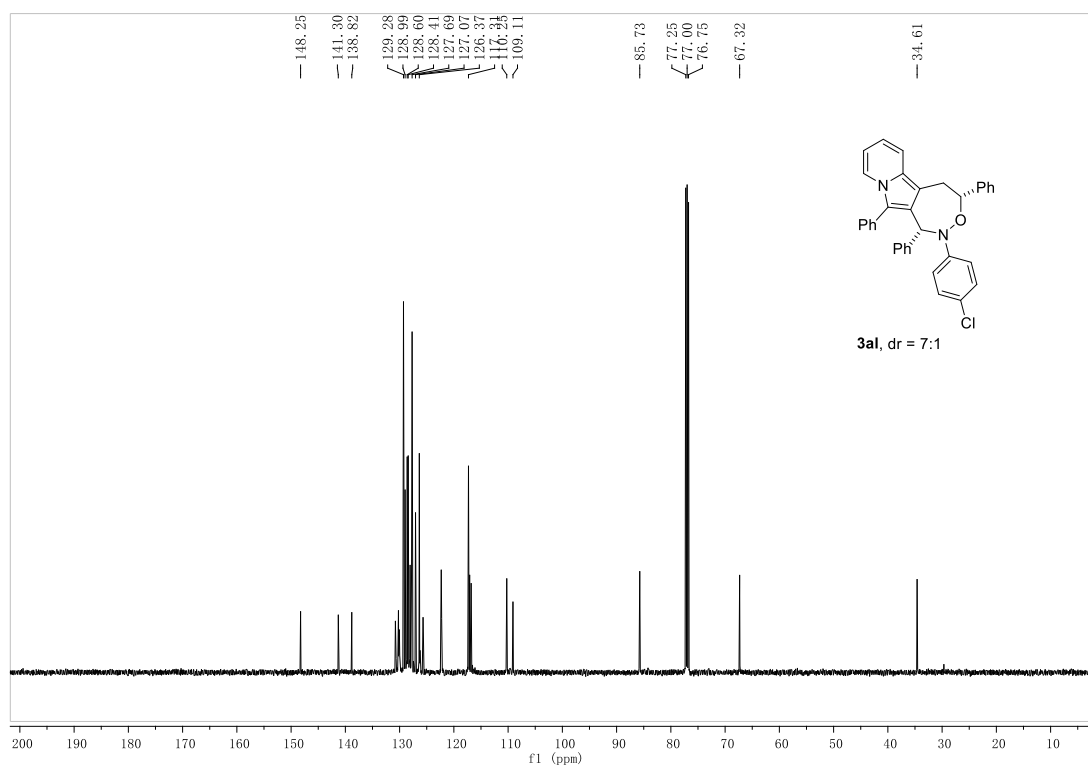

7.61, 7.60, 7.32, 7.20, 7.19, 7.19, 7.09, 7.07, 7.06, 7.05, 7.04, 7.03, 7.02, 7.01, 6.98, 6.97, 6.96, 5.53, 5.06

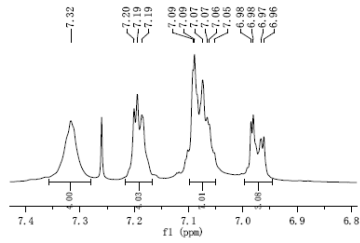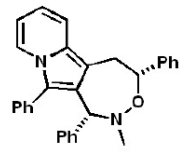

3am d.r.>99:1

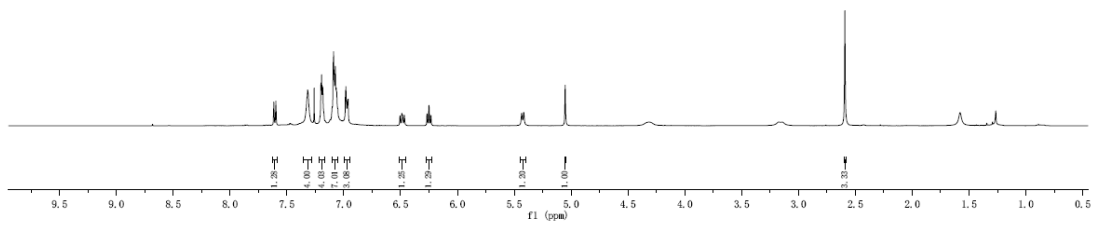

141.79, 128.60, 128.52, 128.52, 127.71, 127.59, 127.59, 127.59, 126.89, 131.68, 130.90, 128.60, 128.52, 127.71, 127.59, 127.59, 126.89, 121.45, 116.96, 115.66, 109.35

82.50, 77.32, 77.09, 76.89

44.28

30.17

129.19, 128.84, 128.82, 128.82, 128.12, 127.83, 127.59, 126.89

131.68, 130.90, 128.60, 128.52, 127.71, 127.59, 127.59, 126.89, 121.45, 116.96, 115.66

82.50, 77.32, 77.09, 76.89

109.35

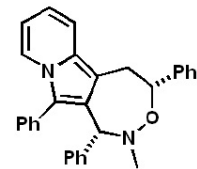

3am d.r.>99:1

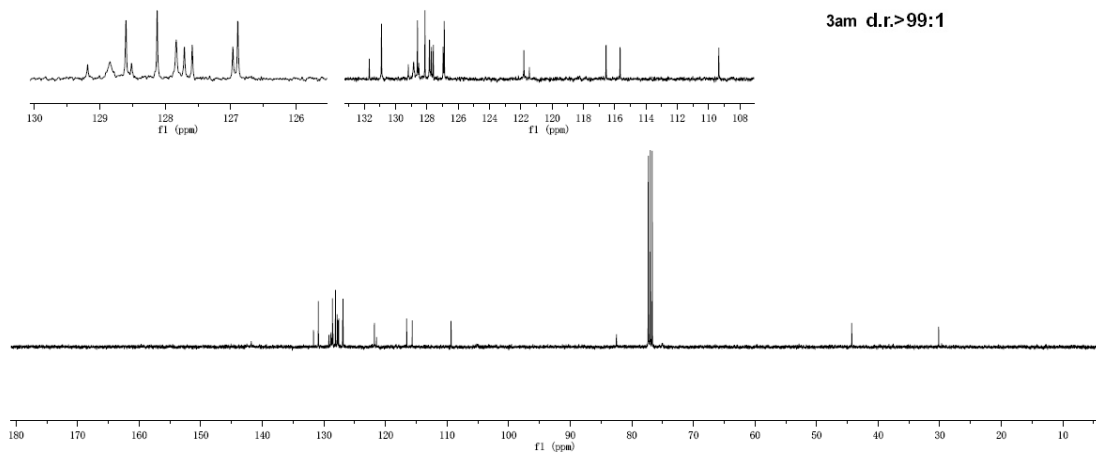

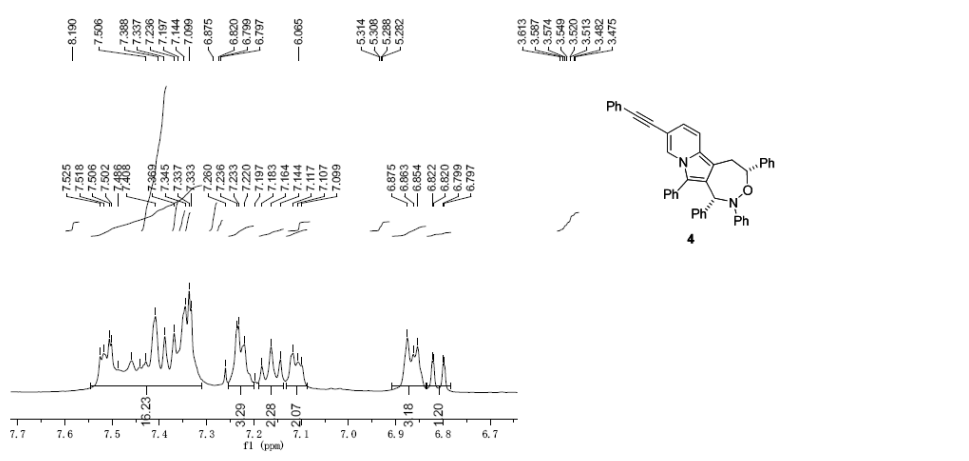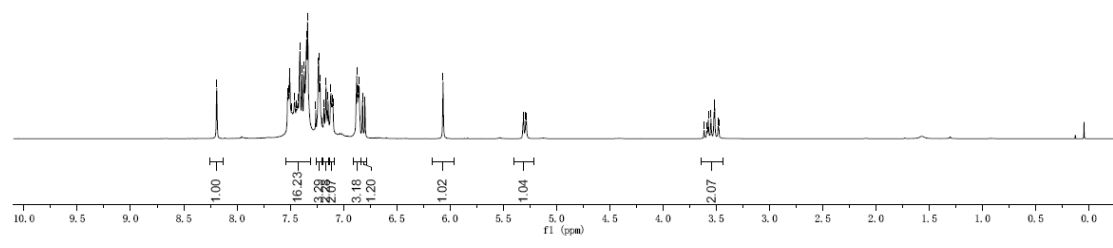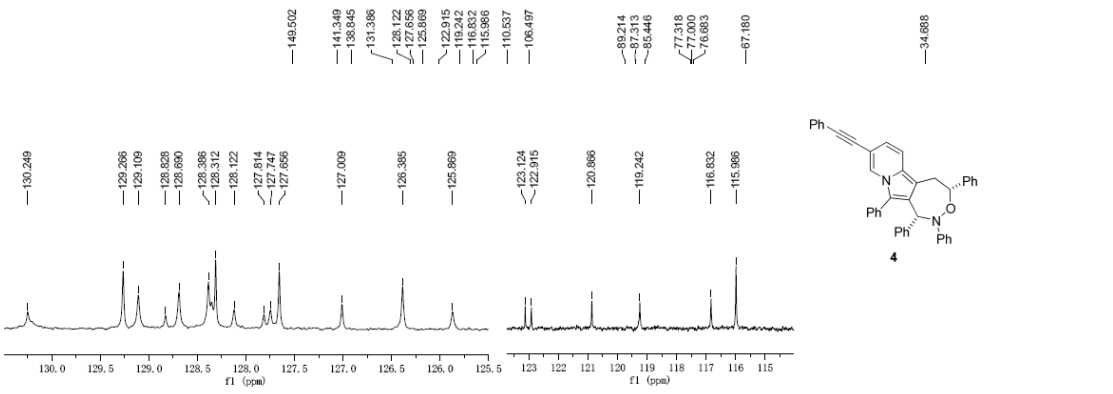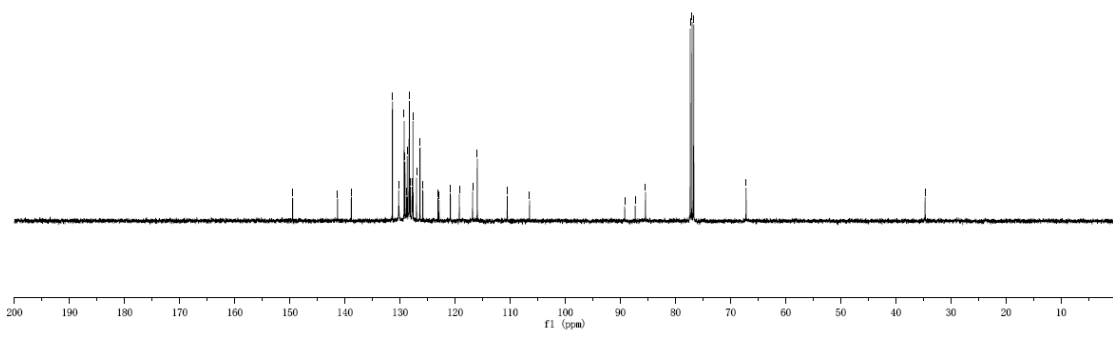

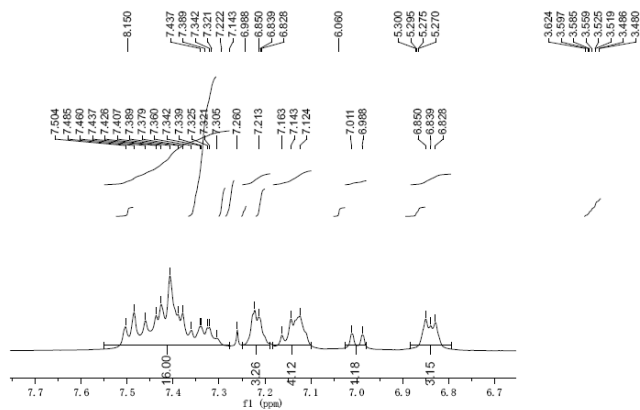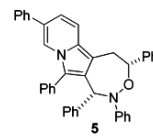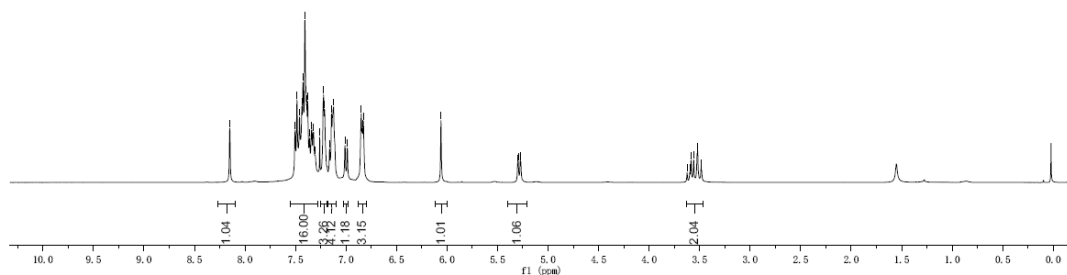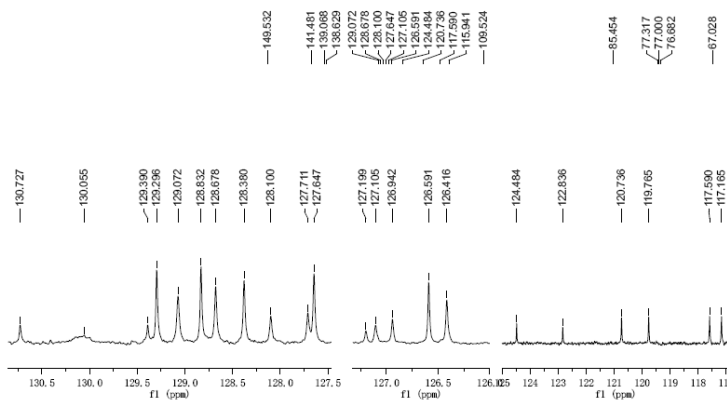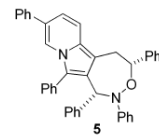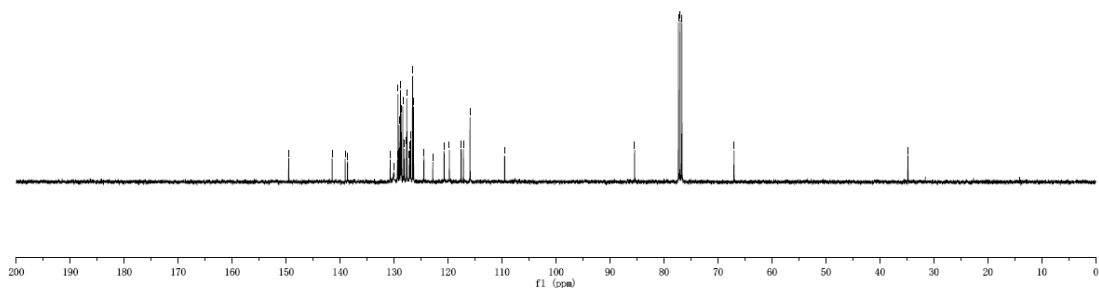

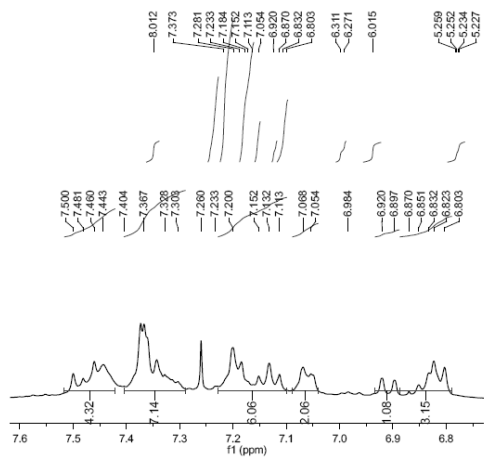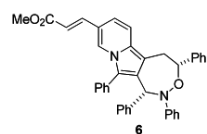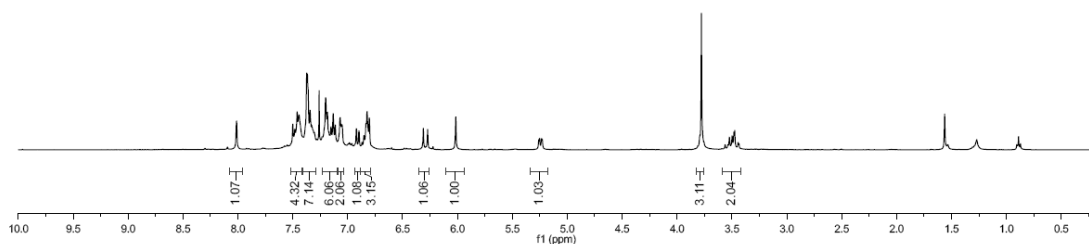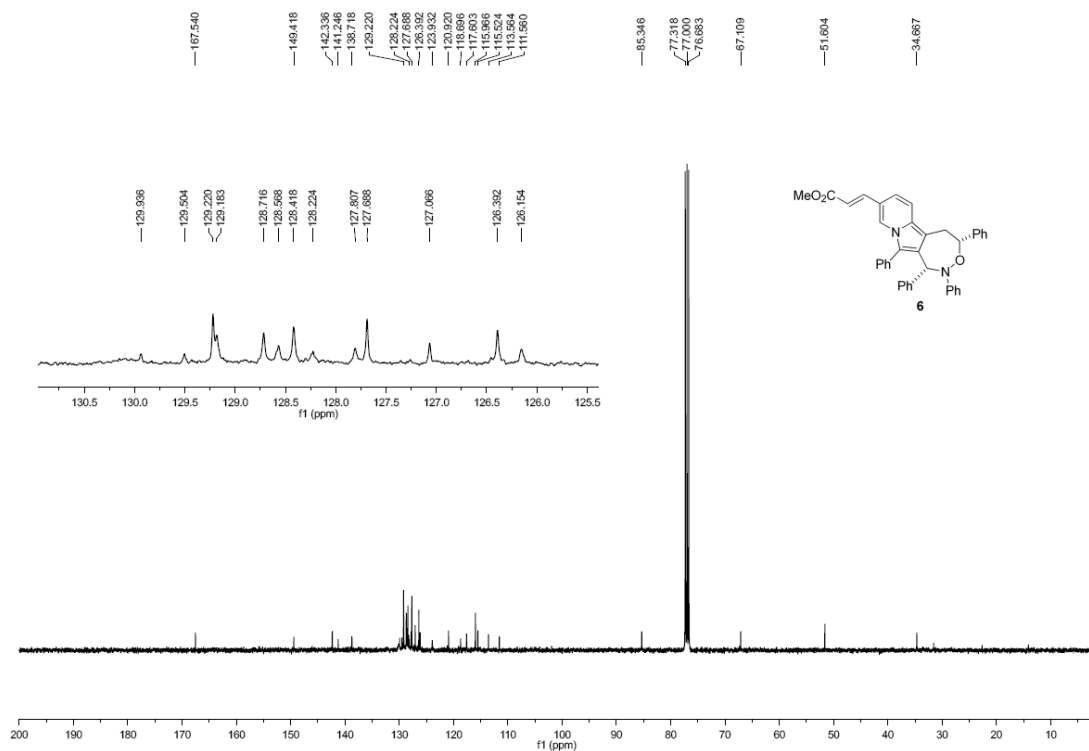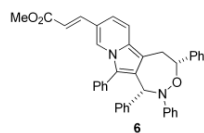

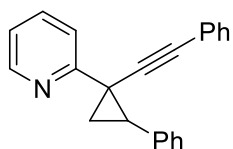

racemic **1a**

数据文件名: YWX-1-26-race-AD9505-254-0.5.lcd  
 样品名: YWX-1-26-race-AD9505-254-0.5

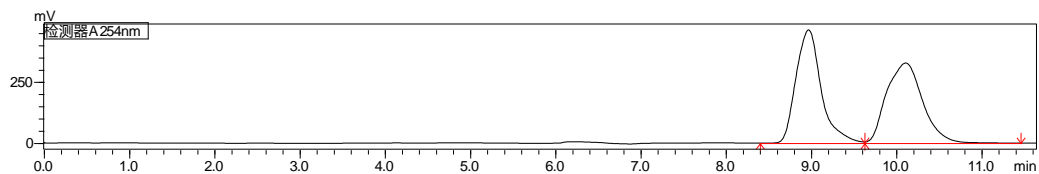

| Peak# | Ret. Time | Height | Area%  |
|-------|-----------|--------|--------|
| 1     | 8.971     | 462555 | 49.775 |
| 2     | 10.110    | 327419 | 50.225 |

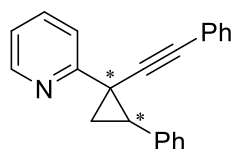

enantioenriched **1a**

ee = 95%

数据文件名: BFC-6-17-gu-AD9505-254-0.5.lcd  
 样品名: BFC-6-17-gu-AD9505-254-0.5

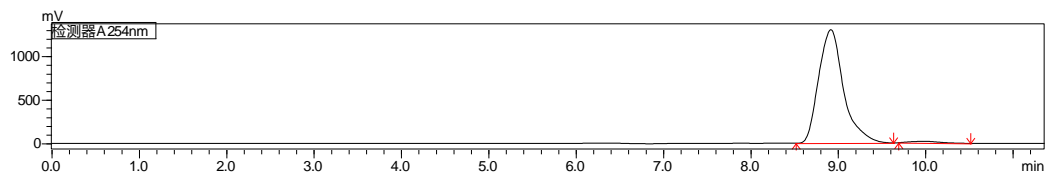

| Peak# | Ret. Time | Height  | Area%  |
|-------|-----------|---------|--------|
| 1     | 8.920     | 1299447 | 98.389 |
| 2     | 9.986     | 18830   | 1.611  |



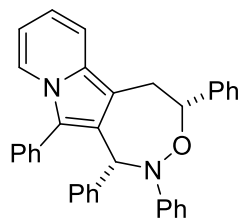

racemic **3aa**

Racemic **3aa**

数据文件名:HZC-1-4-race-IA9802-254-0.5.lcd  
 样品名:HZC-1-4-race-IA9802-254-0.5

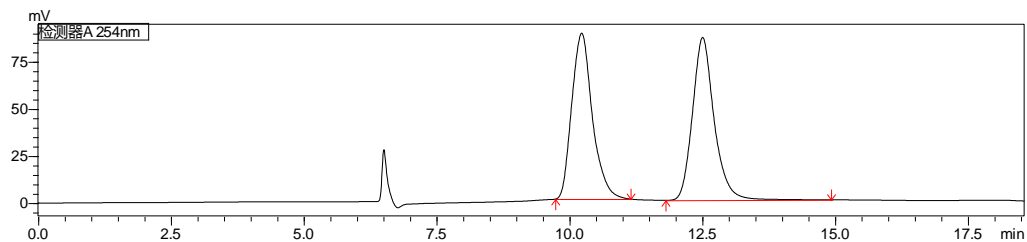

| Peak# | Ret. Time | Height | Area%  |
|-------|-----------|--------|--------|
| 1     | 10.230    | 88013  | 49.204 |
| 2     | 12.506    | 86392  | 50.796 |

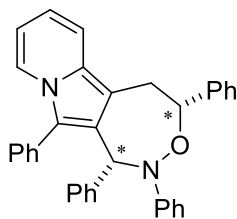

enantioenriched **3aa**

ee = 66%

数据文件名:BFC-6-32-IA9802-254-0.5.lcd  
 样品名:BFC-6-32-IA9802-254-0.5

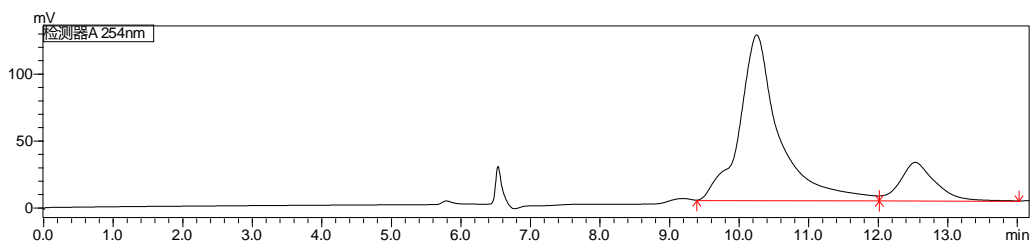

| Peak# | Ret. Time | Height | Area%  |
|-------|-----------|--------|--------|
| 1     | 10.259    | 123512 | 83.204 |
| 2     | 12.539    | 28545  | 16.796 |
